# Supplementary material for: A unique copper-catalyzed cross-coupling reaction by hydrogen (H2) removal for the stereoselective synthesis of 3-phosphoindoles
Source: Royal Society of Chemistry journal article supplement (doi:10.1039/c4cc01815j), 2014-01-01

## Supporting Information

# A Unique Copper-Catalyzed Cross-Hydrogen (H<sub>2</sub>) Removal Coupling to Stereoselective Synthesis of 3-Phosphoindoles

An-Xi Zhou,<sup>a</sup> Liu-Liang Mao,<sup>a</sup> Gang-Wei Wang,<sup>a</sup> Shang-Dong Yang<sup>\*a,b</sup>

<sup>†</sup>State Key Laboratory of Applied Organic Chemistry, Lanzhou University, Lanzhou 730000, P. R. China.

<sup>‡</sup>State Key Laboratory for Oxo Synthesis and Selective Oxidation, Lanzhou Institute of Chemical Physics, Chinese Academy of Sciences, Lanzhou, 730000, P. R. China.

E-mail: yangshd@lzu.edu.cn

### Contents:

|                                                 |     |
|-------------------------------------------------|-----|
| 1. General information.....                     | S2  |
| 2. Screening results and typical procedure..... | S2  |
| 3. Preliminary mechanistic studies.....         | S6  |
| 4. Characterization of new compounds.....       | S12 |
| 5. Charts of products.....                      | S32 |

## 1. General information.

$^1\text{H}$  and  $^{13}\text{C}$  NMR spectra were recorded on a Bruker advance III 400 spectrometer in  $\text{CDCl}_3$  with TMS as internal standard.  $^{31}\text{P}$  NMR spectra and  $^{19}\text{F}$  NMR were recorded on the same instrument. Mass spectra were measured using Bruker microTOF-Q II. The starting materials were purchased from Aldrich, Acros Organics, J&K Chemicals or TCI and used without further purification. Solvents were dried and purified according to the procedure from "Purification of Laboratory Chemicals book". Column chromatography was carried out on silica gel (particle size 200-400 mesh ASTM).

## 2. Screening results and typical procedure.

### 2.1 Reaction Conditions Screening

In an initial study, we chose the *N*-methylindole-2-ethyl formate (**1a**) and  $\text{Ph}_2\text{P}(\text{O})\text{H}$  (**5a**) as model substrates. We extensively screened catalysts, solvents, and temperatures in an argon atmosphere and summarized in Table S1. Gratifyingly, we found that some copper salts such as  $\text{CuCl}$ ,  $\text{CuBr}$ ,  $\text{CuBr} \cdot \text{Me}_2\text{S}$ ,  $\text{CuCl}_2$ ,  $\text{Cu}(\text{acac})_2$ , and  $\text{Cu}(\text{OAc})_2$  serve to helpfully prompt the reaction (Table 1, entries 1-6). Among the  $\text{CuCl}$  gave the best results and the desired product of *N*-methyl-3-phosphoindole (**2a**) was obtained in 64% yield in  $\text{CH}_3\text{CN}$  at  $50^\circ\text{C}$  under the Ar atmosphere (Table 1, entry 1). Encouraged by this result, we further optimized the reaction conditions. Solvents screening showed that the  $\text{CH}_3\text{CN}$  is still the best choice (Table 1, entries 7-10). If the reaction was carried out under the oxygen, the yield of *N*-methyl-3-phosphoindole (**2a**) has not obvious change (Table 1, entry 11). Subsequently, we focused our attention on a variety of nitrogen and phosphine ligands in order to understand their potential in this transformation. Extensive evaluation of ligands leads us to discover that phosphine ligands were effective in this regard (Table 1, entries 12-18). To our delight, the least expensive and most stable  $\text{PPh}_3$  is the best choice. The yield of *N*-methyl-3-phosphoindole was further improved to 97% (Table 1, entry 18). However, when the reaction was carried out under  $\text{O}_2$  or air, the lower yield of *N*-methyl-3-phosphoindole was observed (Table 1, entries 19-20). If the reaction time has been prolonged, the good yield would be afforded under the  $\text{N}_2$  atmosphere. The addition of different bases to this transformation proved unhelpful. Furthermore, the control experiment demonstrated that the use of only  $\text{PPh}_3$  failed to prompt the reaction.

**Table 1.** Reaction Conditions Screening.<sup>a</sup>

CCOC(=O)C1=Cc2ccccc2N1C (1a) + c1ccccc1P(=O)(c1ccccc1)c1ccccc1 (1b)  $\xrightarrow[\text{Solvent, 50 } ^\circ\text{C}]{[\text{Cu}] / \text{Ligand}}$  CCOC(=O)C1=Cc2ccccc2N1COP(=O)(c1ccccc1)c1ccccc1 (2a)

| Entry     | Cu [mol%]                    | Ligand [mol%]                | Solvent                 | Yield [%] <sup>[b]</sup> |
|-----------|------------------------------|------------------------------|-------------------------|--------------------------|
| 1         | CuCl (5.0)                   |                              | CH <sub>3</sub> CN      | 64                       |
| 2         | CuBr (5.0)                   |                              | CH <sub>3</sub> CN      | 42                       |
| 3         | CuBr·Me <sub>2</sub> S (5.0) |                              | CH <sub>3</sub> CN      | 46                       |
| 4         | CuCl <sub>2</sub> (5.0)      |                              | CH <sub>3</sub> CN      | 23                       |
| 5         | Cu(acac) <sub>2</sub> (5.0)  |                              | CH <sub>3</sub> CN      | 22                       |
| 6         | Cu(OAc) <sub>2</sub> (5.0)   |                              | CH <sub>3</sub> CN      | 6                        |
| 7         | CuCl (5.0)                   |                              | DMSO                    | 45                       |
| 8         | CuCl (5.0)                   |                              | DMF                     | 42                       |
| 9         | CuCl (5.0)                   |                              | NMP                     | 38                       |
| 10        | CuCl (5.0)                   |                              | 1,4-dioxane             | 17                       |
| 11        | CuCl (5.0)                   |                              | CH <sub>3</sub> CN      | 62 <sup>[c]</sup>        |
| 12        | CuCl (5.0)                   | dppe (6.0)                   | CH <sub>3</sub> CN      | 84                       |
| 13        | CuCl (5.0)                   | dppp (6.0)                   | CH <sub>3</sub> CN      | 80                       |
| 14        | CuCl (5.0)                   | dppb (6.0)                   | CH <sub>3</sub> CN      | 79                       |
| 15        | CuCl (5.0)                   | dpppe (6.0)                  | CH <sub>3</sub> CN      | 82                       |
| 16        | CuCl (5.0)                   | dppf (6.0)                   | CH <sub>3</sub> CN      | 88                       |
| 17        | CuCl (5.0)                   | binap (6.0)                  | CH <sub>3</sub> CN      | 18                       |
| <b>18</b> | <b>CuCl (5.0)</b>            | <b>PPh<sub>3</sub> (6.0)</b> | <b>CH<sub>3</sub>CN</b> | <b>97</b>                |
| 19        | CuCl (5.0)                   | PPh <sub>3</sub> (6.0)       | CH <sub>3</sub> CN      | 93 <sup>[d]</sup>        |
| 20        | CuCl (5.0)                   | PPh <sub>3</sub> (6.0)       | CH <sub>3</sub> CN      | 51 <sup>[e]</sup>        |
| 21        | -                            | PPh <sub>3</sub> (6.0)       | CH <sub>3</sub> CN      | 0                        |

<sup>a</sup> All reactions were carried out in the presence of 0.3 mmol of HP(O)Ph<sub>2</sub> in 3.0 mL CH<sub>3</sub>CN at 50 °C for 24 h under argon. <sup>b</sup> Isolated yield. <sup>c</sup> Reaction was carried out under the O<sub>2</sub>. <sup>d</sup> Reaction was carried out under the N<sub>2</sub> for 36 h. <sup>e</sup> Reaction was carried out under the air.

## 2.2 General Procedures for CuCl-Catalyzed Direct Dehydrogenative Phosphorylation for Synthesis of 3-Phosphoindoles (2):

In a Schlenk tube, **1** (0.600 mmol), HP(O)Ph<sub>2</sub> (0.300 mmol), CuCl (0.015 mmol), and PPh<sub>3</sub> (0.018 mmol) were added and charged with Ar three times. Then, anhydrous CH<sub>3</sub>CN (3.0 mL) were added. The mixture was allowed to stir at 50 °C for 24 hours (monitored by TLC). After substrate was consumed, the reaction was cooled to room temperature and concentrated in vacuo. the resulting residue diluted with EtOAc (5.0 ml) and washed with water (5.0 ml). The aqueous phase was extracted with EtOAc (2×10.0 mL). The combination of organic phase was dried with anhydrous Na<sub>2</sub>SO<sub>4</sub>

and concentrated in vacuo, and the resulting residue was purified by column chromatography using hexanes/EtOAc (10/1 to 1/1) as the eluent.

### 2.3 General Procedures for CuCl-Catalyzed Direct Dehydrogenative Phosphorylation for Synthesis of 3-Phosphoindoles (4):

In a Schlenk tube, **3** (0.600 mmol), optically pure H-Phosphinate (0.300 mmol), CuCl (0.015 mmol), and PPh<sub>3</sub> (0.018 mmol) were added and charged with Ar three times. Then, anhydrous CH<sub>3</sub>CN (3.0 mL) were added. The mixture was allowed to stir at 80 °C for 24 hours (monitored by TLC). After substrate was consumed, the reaction was cooled to room temperature and concentrated in vacuo. the resulting residue diluted with EtOAc (5.0 ml) and washed with water (5.0 ml). The aqueous phase was extracted with EtOAc (2×10.0 mL). The combination of organic phase was dried with anhydrous Na<sub>2</sub>SO<sub>4</sub> and concentrated in vacuo, and the resulting residue was purified by column chromatography using hexanes/EtOAc (10/1 to 1/1) as the eluent.

### 2.4 Gram-scale synthesis of 2a.

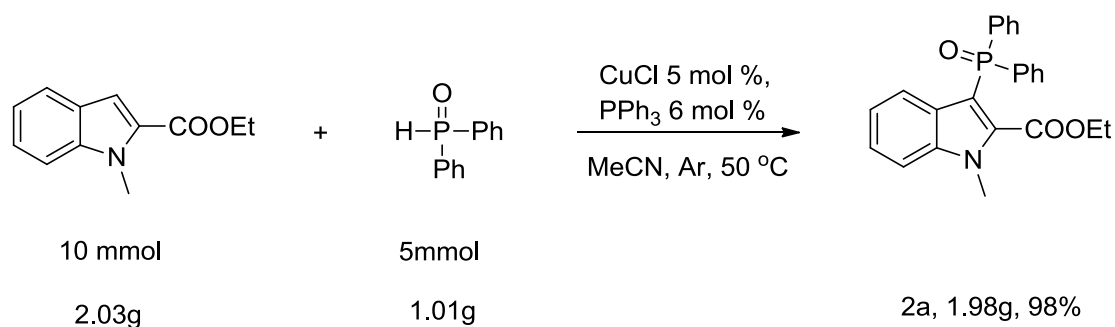

### 2.5 A Typical Procedure for the Preparation of Optically Pure H-Phosphinates:<sup>[S2]</sup>

The mixture of (L)-(-)-menthol (100 g, 641 mmol) and pyridine (51.3 mL, 641 mmol) in Et<sub>2</sub>O (200 mL) was added dropwise with stirring to a PhPCl<sub>2</sub> (87.2 mL, 641 mmol) solution in Et<sub>2</sub>O (400 mL) at 0 °C and then stirred at room temperature overnight. Water (12 mL, 667 mmol) was added, and the reaction mixture was washed with water and extracted with hexane. The hexane layer was dried over magnesium sulfate, filtered, and concentrated. Recrystallization of the mixture in hexane (twice) at -30 °C gave pure H-Phosphinates a white crystal (R<sub>p</sub>/S<sub>p</sub>>99/1).

### 2.6 General Procedures for the determination of the dr values.<sup>[S1]</sup>

In a Schlenk tube, *N*-methylindole-2-ethyl formate (0.600 mmol), the racemic Menthoxy-phenylphosphinate (0.300 mmol), CuCl (0.015 mmol), and PPh<sub>3</sub> (0.018 mmol) were added and charged with Ar three times. Then, anhydrous CH<sub>3</sub>CN (3.0 mL) were added. The mixture was allowed to stir at 80 °C for 24 hours (monitored by TLC). After substrate was consumed, the reaction was cooled to room temperature and concentrated in vacuo. The resulting residue diluted with EtOAc (5.0 ml) and washed with water (5.0 ml). The aqueous phase was extracted with EtOAc (2×10.0 mL). The combination of organic phase was dried with anhydrous Na<sub>2</sub>SO<sub>4</sub> and



concentrated in vacuo. Then the determination of the diastereoselectivity by  $^{31}\text{P}$ NMR, or after by flash column chromatography and determined dr values by  $^{31}\text{P}$ NMR (Figure S1 and Figure S2).

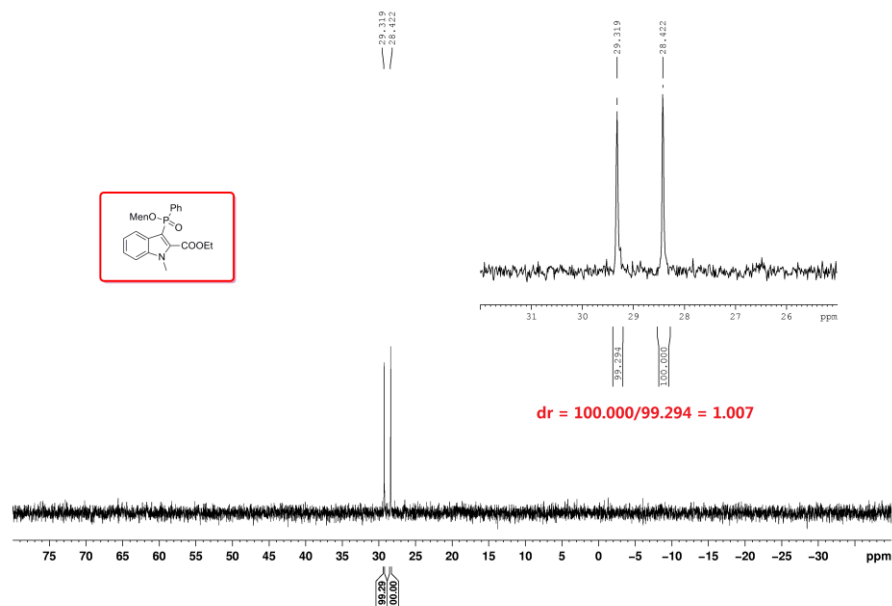

**Figure S1.** The dr value of racemic H-Phosphate according to the  $^{31}\text{P}$ NMR.

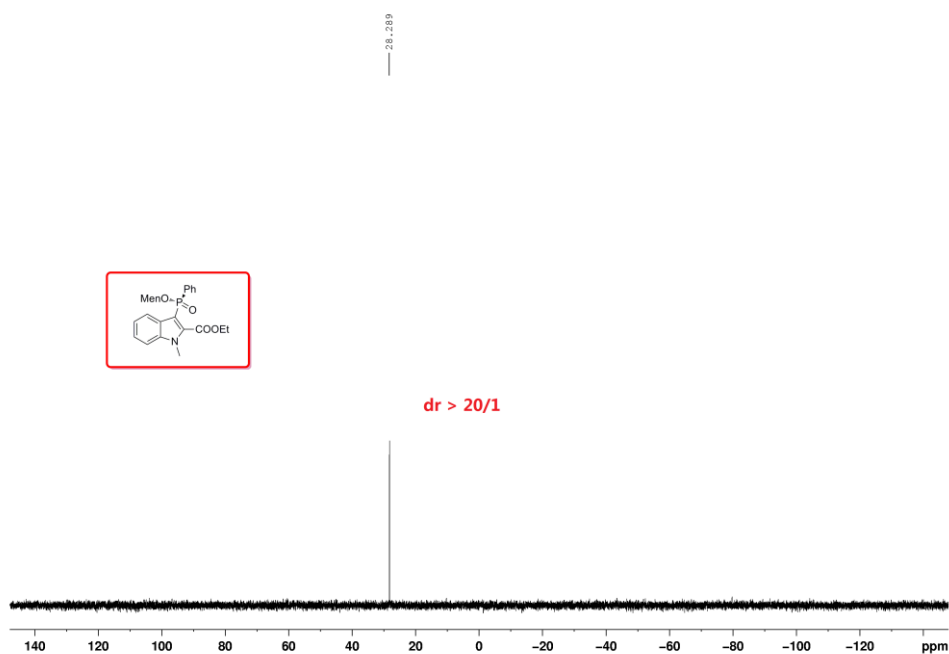

**Figure S2.** The dr value of the optically pure H-Phosphate according to the  $^{31}\text{P}$ NMR.

### 3. Preliminary mechanistic studies.

#### 3.1 Radicals Trapping Experiments:

**a) Procedures for using BHT:** In a Schlenk tube, *N*-methylindole-2-ethyl formate (0.600 mmol), HP(O)Ph<sub>2</sub> (0.300 mmol), CuCl (0.015 mmol), BHT (0.600 mmol) and PPh<sub>3</sub> (0.018 mmol) were added and charged with Ar three times. Then, anhydrous CH<sub>3</sub>CN (3.0 mL) were added. The mixture was allowed to stir at 50 °C for 24 hours (monitored by TLC). After substrate was consumed, the reaction was cooled to room temperature and concentrated in vacuo. the resulting residue diluted with EtOAc (5.0 ml) and washed with water (5.0 ml). The aqueous phase was extracted with EtOAc (2×10.0 mL). The combination of organic phase was dried with anhydrous Na<sub>2</sub>SO<sub>4</sub> and concentrated in vacuo, and the resulting residue was purified by column chromatography to give **2a** in 94% yield.

**b) Procedures for using cyclohexa-1, 4-diene:** In a Schlenk tube, *N*-methylindole-2-ethyl formate (0.600 mmol), HP(O)Ph<sub>2</sub> (0.300 mmol), CuCl (0.015 mmol), cyclohexa-1, 4-diene (0.600 mmol) and PPh<sub>3</sub> (0.018 mmol) were added and charged with Ar three times. Then, anhydrous CH<sub>3</sub>CN (3.0 mL) were added. The mixture was allowed to stir at 50 °C for 24 hours (monitored by TLC). After substrate was consumed, the reaction was cooled to room temperature and concentrated in vacuo. the resulting residue diluted with EtOAc (5.0 ml) and washed with water (5.0 ml). The aqueous phase was extracted with EtOAc (2×10.0 mL). The combination of organic phase was dried with anhydrous Na<sub>2</sub>SO<sub>4</sub> and concentrated in vacuo, and the resulting residue was purified by column chromatography to give **2a** in 89% yield.

**3.2 Competing kinetic isotope effect (KIE) experiment: Intermolecular KIE experiment:** **1a-d<sub>1</sub>** were synthesized deuterium substrates according the literature procedure.<sup>[S3]</sup>

In a Schlenk tube, **1a-d<sub>3</sub>** (0.300 mmol), **1a-d<sub>1</sub>** (0.300 mmol), HP(O)Ph<sub>2</sub> (0.300 mmol), CuCl (0.015 mmol), and PPh<sub>3</sub> (0.018 mmol) were added and charged with Ar three times. Then, anhydrous CH<sub>3</sub>CN (3.0 mL) were added. The mixture was allowed to stir at 50 °C for 10 hours (monitored by TLC). After substrate was consumed, the reaction was cooled to room temperature and concentrated in vacuo. the resulting residue diluted with EtOAc (5.0 ml) and washed with water (5.0 ml). The aqueous phase was extracted with EtOAc (2×10.0 mL). The combination of organic phase was dried with anhydrous Na<sub>2</sub>SO<sub>4</sub> and concentrated in vacuo, and the resulting residue was purified by column chromatography to give **2a-d<sub>3</sub>** and **2a**. The products were under <sup>1</sup>H-NMR analysis. (Figure S3).

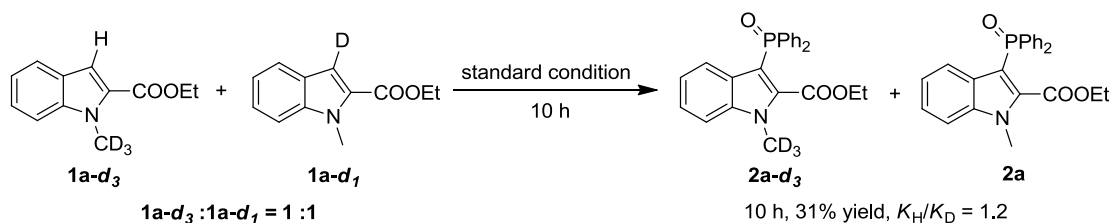

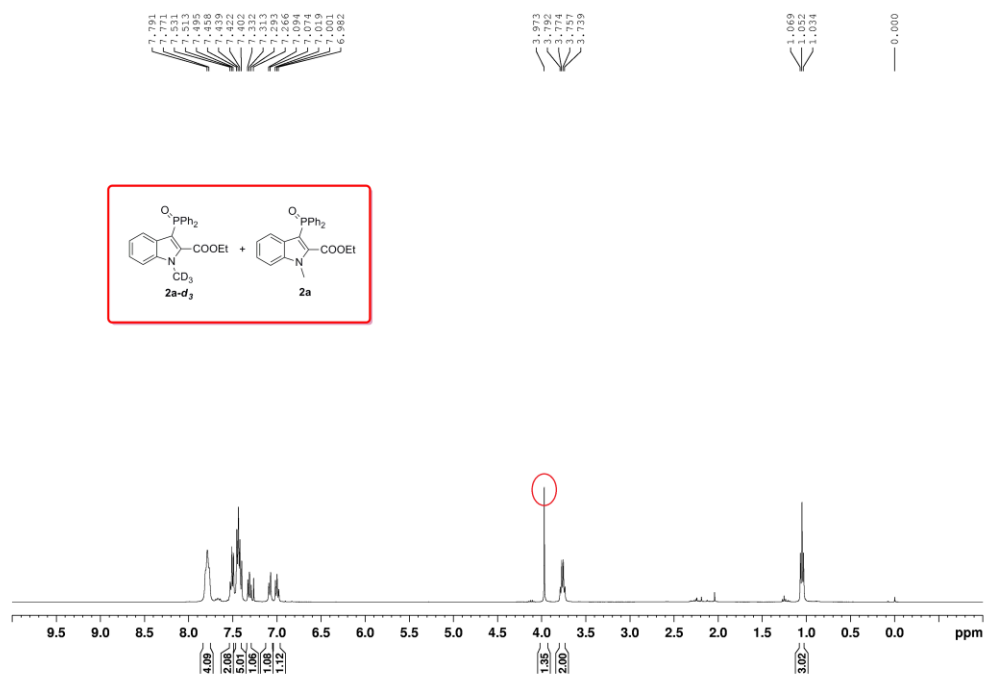

**Figure S3.** <sup>1</sup>H NMR spectra of the mixture of compound **2a** and **2a-d<sub>3</sub>**.

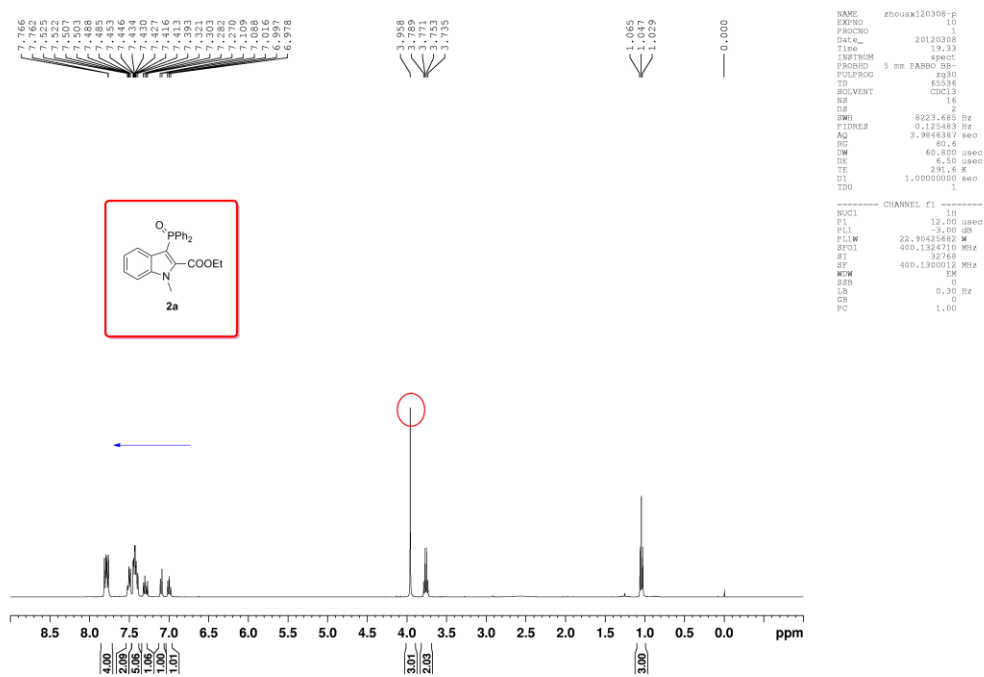

**Figure S4.** <sup>1</sup>H NMR spectra of **2a**.

### 3.3 CuH and Stryker's Reagent-Catalyzed Direct Dehydrogenative Coupling

#### Reaction:

**a) Procedures for using CuH:** In a Schlenk tube, *N*-methylindole-2-ethyl formate (0.600 mmol), HP(O)Ph<sub>2</sub> (0.300 mmol), CuH (0.015 mmol), BHT (0.600 mmol) and PPh<sub>3</sub> (0.018 mmol) were added and charged with Ar three times. Then, anhydrous CH<sub>3</sub>CN (3.0 mL) were added. The mixture was allowed to stir at 50°C for 24 hours (monitored by TLC). After substrate was consumed, the reaction was cooled to room temperature and concentrated in vacuo. the resulting residue diluted with EtOAc (5.0 ml) and washed with water (5.0 ml). The aqueous phase was extracted with EtOAc (2×10.0 mL). The combination of organic phase was dried with anhydrous Na<sub>2</sub>SO<sub>4</sub> and concentrated in vacuo, and the resulting residue was purified by column chromatography to give **2a** in 76 % yield.

**b) Procedures for using Stryker's Reagent:** In a Schlenk tube, *N*-methylindole-2-ethyl formate (0.600 mmol), HP(O)Ph<sub>2</sub> (0.300 mmol), [CuH(PPh<sub>3</sub>)<sub>6</sub>] (0.003 mmol), BHT (0.600 mmol) and PPh<sub>3</sub> (0.018 mmol) were added and charged with Ar three times. Then, anhydrous CH<sub>3</sub>CN (3.0 mL) were added. The mixture was allowed to stir at 50°C for 24 hours (monitored by TLC). After substrate was consumed, the reaction was cooled to room temperature and concentrated in vacuo. the resulting residue diluted with EtOAc (5.0 ml) and washed with water (5.0 ml). The aqueous phase was extracted with EtOAc (2×10.0 mL). The combination of organic phase was dried with anhydrous Na<sub>2</sub>SO<sub>4</sub> and concentrated in vacuo, and the resulting residue was purified by column chromatography to give **2a** in 78 % yield.

#### Reference:

- [S1] Han, L. B. and Zhao, C. Q., *J. Org. Chem.*, **2005**, 70, 10121.  
[S2] (a) Farnham, W. B.; Murray, R. K.; Mislow, K. *J. Am. Chem. Soc.* **1970**, 92, 5809. (b) Reiff, L. P.; Aaron, H. S. *J. Am. Chem. Soc.* **1970**, 92, 5275. (c) Benschop, H. P.; Platenburg, D. H. J. M.; Meppelder, F. H.; Boter, H. *J. Chem. Commun.* **1970**, 33. (d) Bodalski, R.; Koszuk, J. *Phosphorus, Sulfur, Silicon Relat. Elem.* **1989**, 44, 99. (e) Han, L.-B.; Zhao, C.-Q.; Onozawa, S.; Goto, M.; Tanaka, M. *J. Am. Chem. Soc.* **2002**, 124, 3842. (f) Han, L.-B.; Zhao, C.-Q. *J. Org. Chem.* **2005**, 70, 10121. (g) Han, L.-B.; Zhao, C.-Q.; Xu, Q. *J. Am. Chem. Soc.* **2008**, 130, 12648. (h) Storer, R.; Alexandre, F. R.; Dousson, C.; Moussa, A. M.; Bridges, E. *Enantiomerically pure phosphoindoles as HIV inhibitors*. WO PCT Int. Appl. 042240, 2008.  
[S3] Wang, R., Shi, H. F., Zhao, J. F., He, Y. P., Zhang, H. B., Liu, J. P., *Bioorg. Med. Chem. Lett.*, **2013**, 23, 1760.

### 3.4 Hydrogen detection

#### 1. a) Hydrogen detector:

HEWLETT5890 PACKADR SERIES II GAS CHROMATOGRAPH

b) Carrier gas: Ar

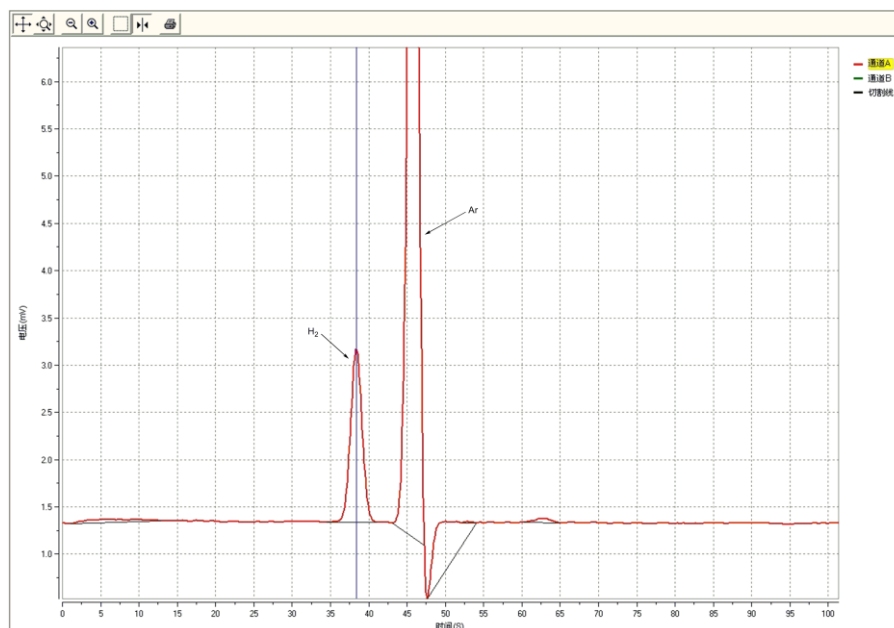

Figure S5. The standard spectrogram of H<sub>2</sub>.

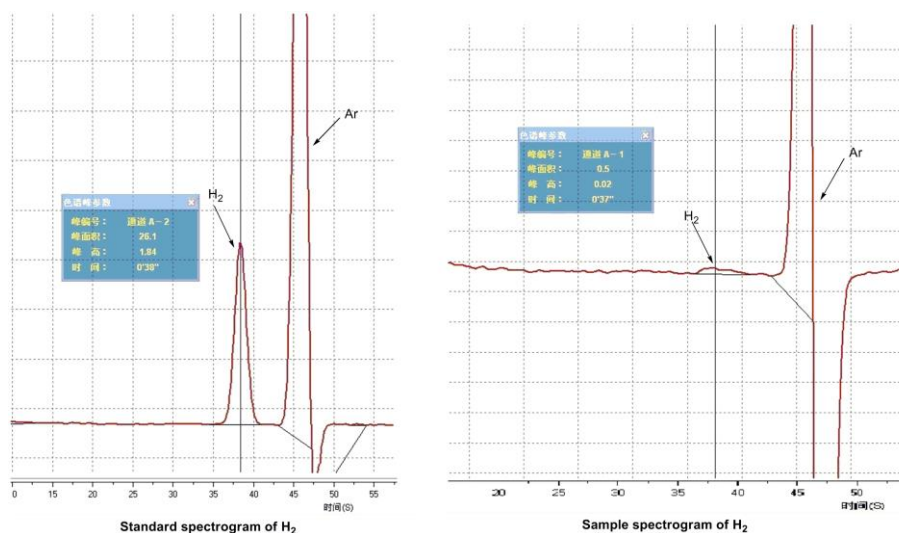

Figure S6. The detected spectrogram of H<sub>2</sub>.

#### a) Procedures for the detected H<sub>2</sub> by Gas Chromatograph:

By using the high purity of Ar as carrier gas, we first injected the pure H<sub>2</sub> into the Hewlett5890 Packadr Series II Gas Chromatograph and detected standard spectrogram of H<sub>2</sub> (Figure S5). Then 15 minutes later, we injected the sample gas of reaction system into the Gas Chromatograph and observed the peak of H<sub>2</sub> (Figure S6). This result showed that the H<sub>2</sub> has been released from the reaction.

## 2. Hydrogen detector: TAYASAF-MG01 portable H<sub>2</sub> Detector

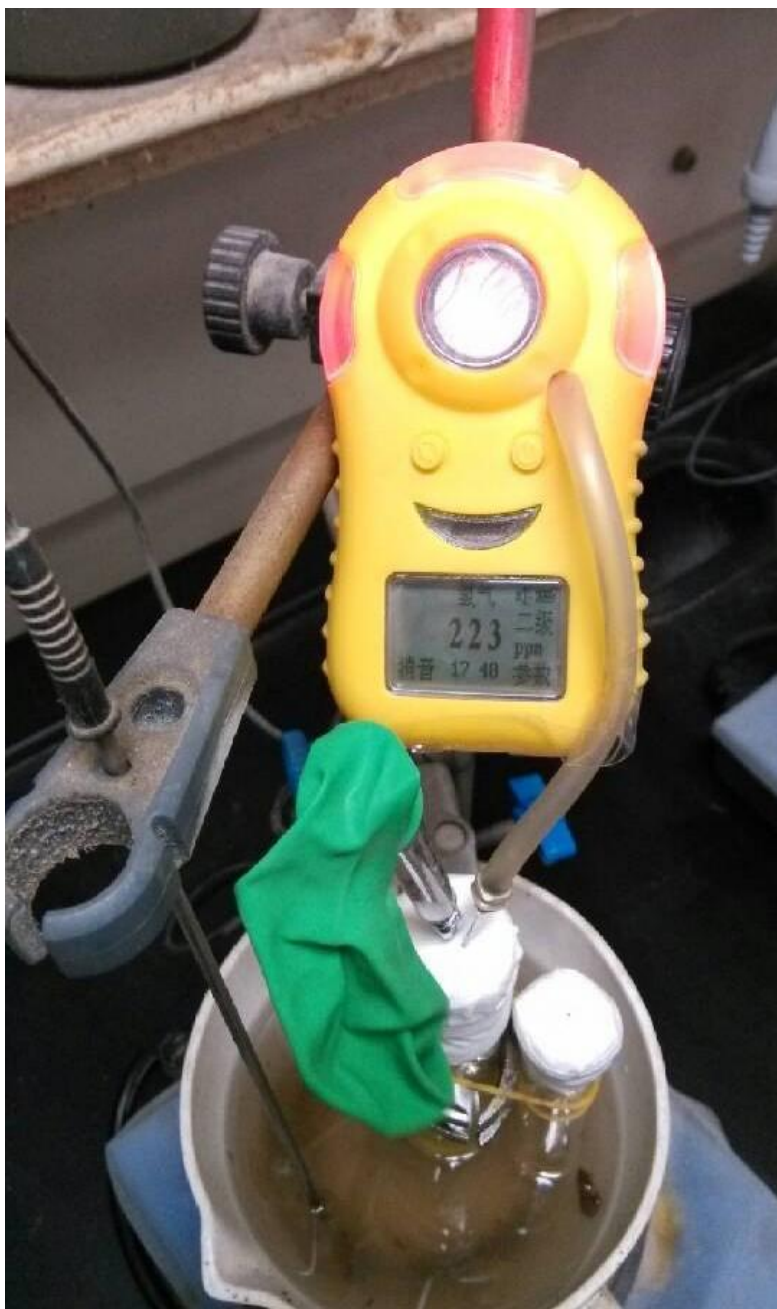

**Figure S7.** The concentration of H<sub>2</sub> (223 ppm).

### **b) Procedures for the detected H<sub>2</sub> by Portable H<sub>2</sub> Detector:**

In a 50 mL round-bottom flask, *N*-methylindole-2-ethyl formate (10.0 mmol), H-Phosphinate (5.0 mmol), CuCl 5.0 mmol%, and 6.0 mmol% were added and charged with Ar three times. Then, anhydrous CH<sub>3</sub>CN (20.0 mL) were added. The mixture was allowed to stir at 50°C for 24 hours and then the reaction was cooled to room temperature. After we injected the syringe needle, which linked with Portable H<sub>2</sub> Detector, into the reaction system and H<sub>2</sub> Detector began to alarm and the instantaneous H<sub>2</sub> concentration was detected with 223 ppm. It worth to note that the highest concentration reached 476 ppm.

### 3. Mixing Stryker's reagent with $\text{HP(O)Ph}_2$

a) Hydrogen detector: TAYASAF-MG01 portable  $\text{H}_2$  Detector

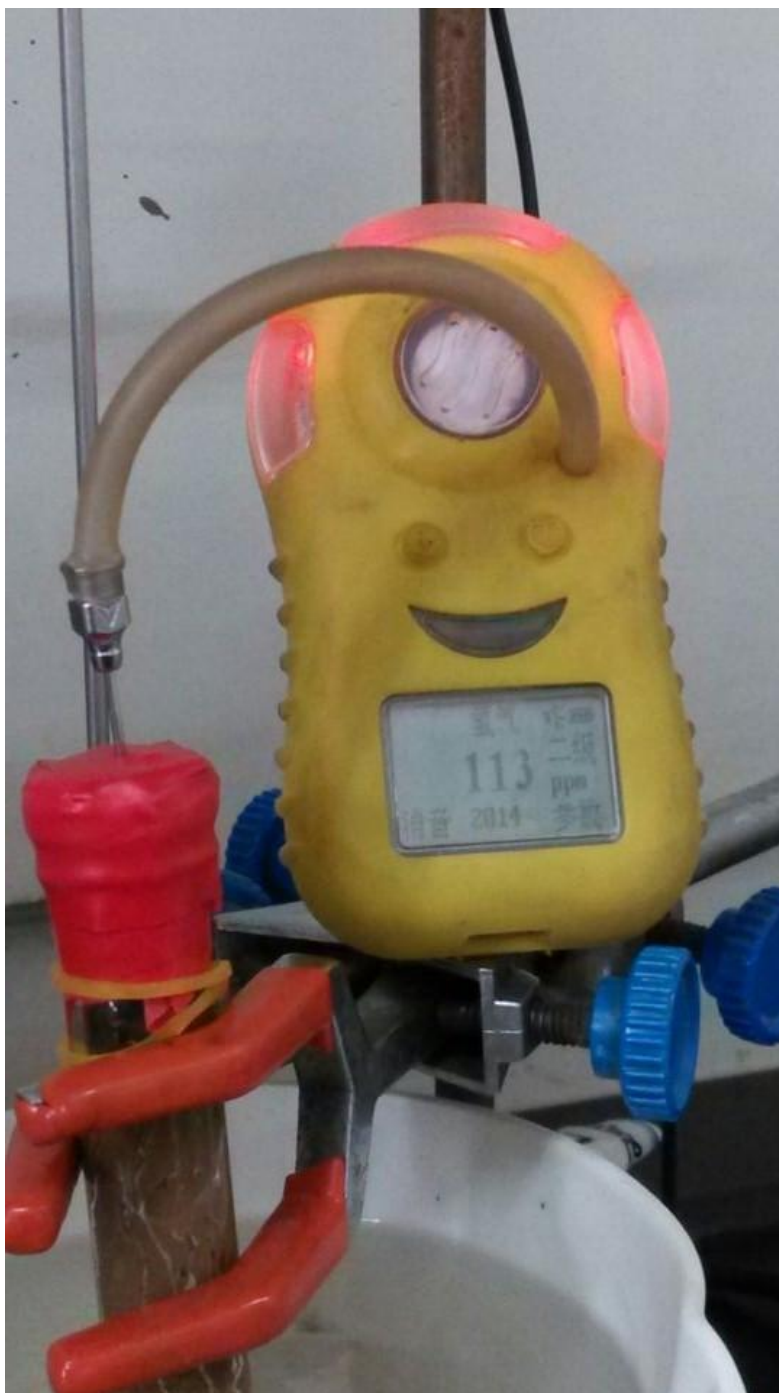

**Figure S8.** the observation of  $\text{H}_2$  evolution

b) Procedures for the detected  $\text{H}_2$  by Portable  $\text{H}_2$  Detector:

In a 10 mL round-bottom flask, H-Phosphinate (0.5 mmol), Stryker's reagent (0.5 mmol) were added and charged with Ar three times. Then, anhydrous  $\text{CH}_3\text{CN}$  (5.0 mL) were added. The mixture was allowed to stir at  $50^\circ\text{C}$  for 12 hours and then the reaction was cooled to room temperature. After we injected the syringe needle, which linked with Portable  $\text{H}_2$  Detector, into the reaction system and  $\text{H}_2$  Detector began to alarm and the instantaneous  $\text{H}_2$  concentration was detected with 113 ppm.



#### 4. Characterization of new compounds.

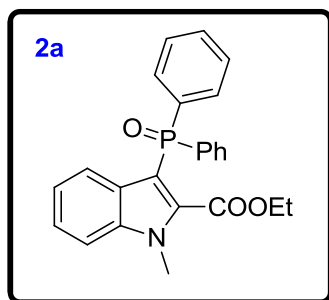

Prepared according to the general procedure. Flash column chromatography on a silica gel (ethyl acetate: petroleum ether, 2: 1) give the product (97% yield) as a white solid. Mp: 148-150 °C.  $R_f$  (ethyl acetate: petroleum ether, 2:1): 0.29.  $^1\text{H NMR}$  (400 MHz,  $\text{CDCl}_3$ ):  $\delta$  7.84 - 7.76 (m, 4H), 7.53 - 7.48 (m, 2H), 7.46 - 7.39 (m, 5H), 7.33 - 7.27 (m, 1H), 7.10 (d,  $J$  = 8.4 Hz, 1H), 7.00 (t,  $J$  = 7.6 Hz, 1H), 3.96 (s, 3H), 3.76 (q,  $J$  = 7.2 Hz, 2H), 1.05 (t,  $J$  = 7.2 Hz, 3H).  $^{13}\text{C NMR}$  (100 MHz,  $\text{CDCl}_3$ ):  $\delta$  161.6, 138.1 (d,  $J_{\text{C-P}}$  = 11.0 Hz), 135.5 (d,  $J_{\text{C-P}}$  = 16.0 Hz), 134.6 (d,  $J_{\text{C-P}}$  = 109.0 Hz), 131.5, 131.4 (d,  $J_{\text{C-P}}$  = 3.0 Hz), 128.5 (d,  $J_{\text{C-P}}$  = 9.0 Hz), 128.3 (d,  $J_{\text{C-P}}$  = 13.0 Hz), 124.6, 122.7, 121.9, 110.3, 107.2 (d,  $J_{\text{C-P}}$  = 120.0 Hz), 61.9, 31.8, 13.4.  $^{31}\text{P NMR}$  (162 MHz,  $\text{CDCl}_3$ ):  $\delta$  21.66. **HRMS** Calcd for  $\text{C}_{24}\text{H}_{22}\text{NaO}_3\text{P}$  [ $\text{M} + \text{Na}$ ] $^+$  426.1230, found 426.1224.

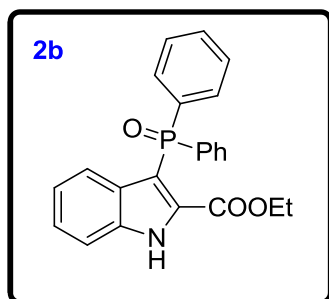

Prepared according to the general procedure. Flash column chromatography on a silica gel (ethyl acetate: petroleum ether, 2: 1) give the product (93% yield) as a white solid. Mp: 226-228 °C.  $R_f$  (ethyl acetate: petroleum ether, 2:1): 0.13.  $^1\text{H NMR}$  (400 MHz,  $\text{d}_6\text{-DMSO}$ ):  $\delta$  12.85 (brs, 1H), 7.72 - 7.66 (m, 4H), 7.59 - 7.56 (m, 3H), 7.51 - 7.49 (m, 4H), 7.31 - 7.26 (m, 2H), 6.98 (t,  $J$  = 7.6 Hz, 1H), 3.81 (q,  $J$  = 6.8 Hz, 2H), 0.89 (t,  $J$  = 6.8 Hz, 3H).  $^{13}\text{C NMR}$  (100 MHz,  $\text{d}_6\text{-DMSO}$ ):  $\delta$  160.2, 136.7 (d,  $J_{\text{C-P}}$  = 12.0 Hz), 135.2 (d,  $J_{\text{C-P}}$  = 108.0 Hz), 132.3 (d,  $J_{\text{C-P}}$  = 15.0 Hz), 131.5, 131.0 (d,  $J_{\text{C-P}}$  = 10.0 Hz), 129.9 (d,  $J_{\text{C-P}}$  = 8.0 Hz), 128.5 (d,  $J_{\text{C-P}}$  = 12.0 Hz), 124.9, 122.5, 121.5, 113.1, 107.4 (d,  $J_{\text{C-P}}$  = 118.0 Hz), 61.1, 13.6.  $^{31}\text{P NMR}$  (162 MHz,  $\text{d}_6\text{-DMSO}$ ):  $\delta$  21.13. **HRMS** Calcd for  $\text{C}_{23}\text{H}_{20}\text{NNaO}_3\text{P}$  [ $\text{M} + \text{Na}$ ] $^+$  412.1073, found 412.1065.



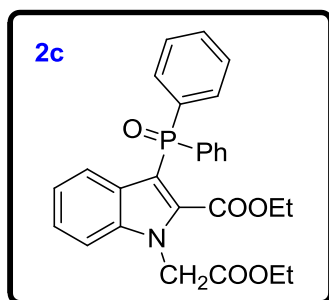

Prepared according to the general procedure. Flash column chromatography on a silica gel (ethyl acetate: petroleum ether, 2: 1) give the product (78% yield) as a white solid. Mp: 155-157 °C. **R<sub>f</sub>** (ethyl acetate: petroleum ether, 2:1): 0.24. **<sup>1</sup>H NMR (400 MHz, CDCl<sub>3</sub>):** δ 7.82 - 7.76 (m, 4H), 7.53 - 7.49 (m, 2H), 7.47 - 7.41 (m, 4H), 7.34 - 7.32 (m, 2H), 7.19 (d, *J* = 8.4 Hz, 1H), 7.04 - 7.00 (m, 1H), 5.24 (s, 2H), 4.21 (q, *J* = 7.2 Hz, 2H), 3.73 (q, *J* = 7.2 Hz, 2H), 1.25 (t, *J* = 7.2 Hz, 3H), 0.97 (t, *J* = 7.2 Hz, 3H). **<sup>13</sup>C NMR (100 MHz, CDCl<sub>3</sub>):** δ 167.8, 161.2, 138.2 (d, *J*<sub>C-P</sub> = 10.0 Hz), 134.8 (d, *J*<sub>C-P</sub> = 110.0 Hz), 134.4, 131.5 (d, *J*<sub>C-P</sub> = 10.0 Hz), 128.9 (d, *J*<sub>C-P</sub> = 8.0 Hz), 128.3 (d, *J*<sub>C-P</sub> = 12.0 Hz), 125.3, 123.4, 122.3, 109.7, 109.6 (d, *J*<sub>C-P</sub> = 118.0 Hz), 61.8, 61.6, 46.5, 14.0, 13.4. **<sup>31</sup>P NMR (162 MHz, CDCl<sub>3</sub>):** δ 22.64. **HRMS** Calcd for C<sub>27</sub>H<sub>26</sub>NNaO<sub>5</sub>P [M + Na]<sup>+</sup> 498.1441, found 498.1450.

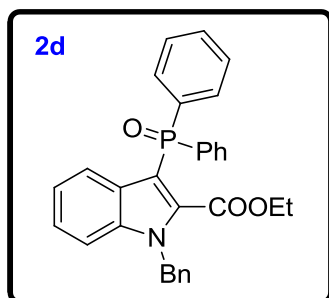

Prepared according to the general procedure. Flash column chromatography on a silica gel (ethyl acetate: petroleum ether, 2: 1) give the product (80% yield) as a yellow oil. **R<sub>f</sub>** (ethyl acetate: petroleum ether, 2:1): 0.42. **<sup>1</sup>H NMR (400 MHz, CDCl<sub>3</sub>):** δ 7.83 - 7.76 (m, 4H), 7.55 - 7.50 (m, 2H), 7.47 - 7.42 (m, 4H), 7.36 (d, *J* = 8.4 Hz, 1H), 7.31 - 7.23 (m, 4H), 7.15 (d, *J* = 8.0 Hz, 1H), 7.08 (d, *J* = 6.8 Hz, 1H), 7.00 (t, *J* = 7.2 Hz, 1H), 5.64 (s, 2H), 3.65 (q, *J* = 7.2 Hz, 2H), 0.93 (t, *J* = 7.2 Hz, 3H). **<sup>13</sup>C NMR (100 MHz, CDCl<sub>3</sub>):** δ 161.7, 137.9 (d, *J*<sub>C-P</sub> = 11.0 Hz), 136.6, 135.7 (d, *J*<sub>C-P</sub> = 16.0 Hz), 134.6 (d, *J*<sub>C-P</sub> = 109.0 Hz), 131.7, 131.5 (d, *J*<sub>C-P</sub> = 4.0 Hz), 128.9, 1128.7 (d, *J*<sub>C-P</sub> = 5.0 Hz), 128.4, 128.3, 127.7, 126.5, 124.9, 123.0, 122.1, 110.9, 108.0 (d, *J*<sub>C-P</sub> = 109.0 Hz), 61.8, 48.5, 13.4. **<sup>31</sup>P NMR (162 MHz, CDCl<sub>3</sub>):** δ 21.44. **HRMS** Calcd for C<sub>30</sub>H<sub>26</sub>NNaO<sub>3</sub>P [M + Na]<sup>+</sup> 502.1546, found 502.1548.

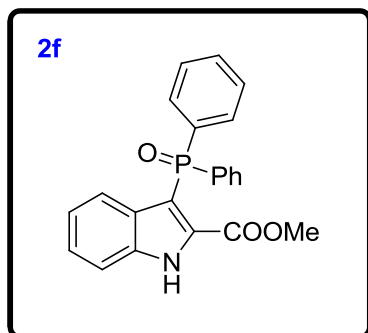

Prepared according to the general procedure. Flash column chromatography on a silica gel (ethyl acetate: petroleum ether, 2: 1) give the product (88% yield) as a white solid. Mp: 215-217 °C. **R<sub>f</sub>** (ethyl acetate: petroleum ether, 2:1): 0.10. **<sup>1</sup>H NMR (400 MHz, CDCl<sub>3</sub>)**: δ 7.70 - 7.64 (m, 4H), 7.53 - 7.46 (m, 3H), 7.45 - 7.40 (m, 4H), 7.22 - 7.17 (m, 1H), 6.93 - 6.84 (m, 2H), 4.77 (s, 3H), 3.36 (s, 3H). **<sup>13</sup>C NMR (100 MHz, CDCl<sub>3</sub>)**: δ 162.0, 138.4 (d, *J*<sub>C-P</sub> = 12.0 Hz), 135.4 (d, *J*<sub>C-P</sub> = 111.0 Hz), 134.4 (d, *J*<sub>C-P</sub> = 16.0 Hz), 133.2.0 (d, *J*<sub>C-P</sub> = 3.0 Hz), 132.7, 132.6, 131.2 (d, *J*<sub>C-P</sub> = 9.0 Hz), 129.9, 129.8, 126.5, 123.4, 123.1, 114.0, 108.0 (d, *J*<sub>C-P</sub> = 123.0 Hz), 52.5. **<sup>31</sup>P NMR (162 MHz, CDCl<sub>3</sub>)**: δ 26.10. **HRMS** Calcd for C<sub>22</sub>H<sub>18</sub>NNaO<sub>3</sub>P [M + Na]<sup>+</sup> 398.0917, found 398.0902.

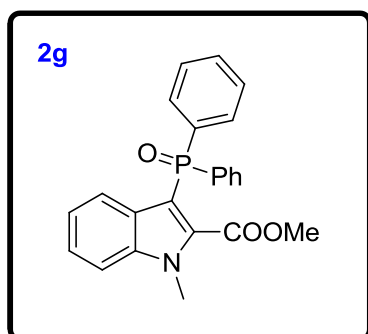

Prepared according to the general procedure. Flash column chromatography on a silica gel (ethyl acetate: petroleum ether, 2: 1) give the product (91% yield) as a white solid. Mp: 171-173 °C. **R<sub>f</sub>** (ethyl acetate: petroleum ether, 2:1): 0.19. **<sup>1</sup>H NMR (400 MHz, CDCl<sub>3</sub>)**: δ 7.83 - 7.75 (m, 4H), 7.52 - 7.47 (m, 2H), 7.44 - 7.39 (m, 5H), 7.31 (t, *J* = 7.2 Hz, 1H), 7.17 (d, *J* = 8.4 Hz, 1H), 7.00 (t, *J* = 7.6 Hz, 1H), 3.96 (s, 3H), 3.27 (s, 3H). **<sup>13</sup>C NMR (100 MHz, CDCl<sub>3</sub>)**: δ 162.0, 138.4 (d, *J*<sub>C-P</sub> = 10.0 Hz), 134.9 134.8 (d, *J*<sub>C-P</sub> = 109.0 Hz), 131.4 (d, *J*<sub>C-P</sub> = 2.0 Hz), 131.3 (d, *J*<sub>C-P</sub> = 10.0 Hz), 128.7 (d, *J*<sub>C-P</sub> = 10.0 Hz), 128.5, 128.4, 124.9, 123.0, 122.0, 110.4, 108.1 (d, *J*<sub>C-P</sub> = 119.0 Hz), 51.8, 31.9. **<sup>31</sup>P NMR (162 MHz, CDCl<sub>3</sub>)**: δ 21.05. **HRMS** Calcd for C<sub>23</sub>H<sub>20</sub>NNaO<sub>3</sub>P [M + Na]<sup>+</sup> 412.1073, found 412.1079.

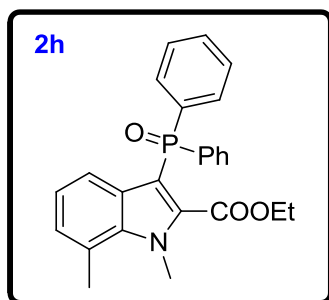

Prepared according to the general procedure. Flash column chromatography on a silica gel (ethyl acetate: petroleum ether, 2: 1) give the product (90% yield) as a yellow oil. **R<sub>f</sub>** (ethyl acetate: petroleum ether, 2:1): 0.35. **<sup>1</sup>H NMR (400 MHz, CDCl<sub>3</sub>):** δ 7.80 - 7.74 (m, 4H), 7.52 - 7.47 (m, 2H), 7.44 - 7.40 (m, 4H), 7.12 (d, *J* = 8.4 Hz, 1H), 6.99 (d, *J* = 7.2 Hz, 1H), 6.87 (t, *J* = 7.6 Hz, 1H), 4.13 (s, 3H), 3.76 (q, *J* = 7.2 Hz, 2H), 2.77 (s, 3H), 1.09 (t, *J* = 7.2 Hz, 3H). **<sup>13</sup>C NMR (100 MHz, CDCl<sub>3</sub>):** δ 162.2, 137.6 (d, *J*<sub>C-P</sub> = 16.0 Hz), 137.0 (d, *J*<sub>C-P</sub> = 11.0 Hz), 134.3 (d, *J*<sub>C-P</sub> = 109.0 Hz), 132.0, 131.9, 131.8, 131.6, 131.5, 131.4 (d, *J*<sub>C-P</sub> = 2.0 Hz), 129.3 (d, *J*<sub>C-P</sub> = 8.0 Hz), 128.5, 128.3 (d, *J*<sub>C-P</sub> = 6.0 Hz), 128.2, 127.3, 121.9, 121.8, 120.7, 106.0 (d, *J*<sub>C-P</sub> = 121.0 Hz), 61.9, 34.9, 20.5, 13.5. **<sup>31</sup>P NMR (162 MHz, CDCl<sub>3</sub>):** δ 21.57. **HRMS** Calcd for C<sub>25</sub>H<sub>24</sub>NNaO<sub>3</sub>P [M + Na]<sup>+</sup> 440.1410, found 440.1398.

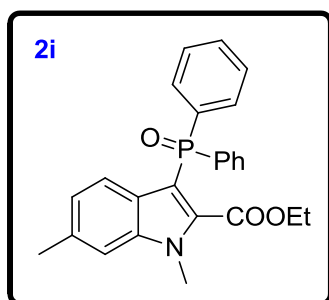

Prepared according to the general procedure. Flash column chromatography on a silica gel (ethyl acetate: petroleum ether, 2: 1) give the product (90% yield) as a white solid. Mp: 163-165 °C. **R<sub>f</sub>** (ethyl acetate: petroleum ether, 2:1): 0.27. **<sup>1</sup>H NMR (400 MHz, CDCl<sub>3</sub>):** δ 7.81 - 7.76 (m, 4H), 7.51 - 7.48 (m, 2H), 7.45 - 7.40 (m, 4H), 7.19 (s, 1H), 6.90 (d, *J* = 8.4 Hz, 1H), 6.82 (t, *J* = 8.4 Hz, 1H), 3.94 (s, 3H), 3.76 (q, *J* = 7.2 Hz, 2H), 2.43 (s, 3H), 1.03 (t, *J* = 7.2 Hz, 3H). **<sup>13</sup>C NMR (100 MHz, CDCl<sub>3</sub>):** δ 161.6, 138.7 (d, *J*<sub>C-P</sub> = 11.0 Hz), 135.1 (d, *J*<sub>C-P</sub> = 109.0 Hz), 134.9, 134.8 (d, *J*<sub>C-P</sub> = 12.0 Hz), 131.4 (d, *J*<sub>C-P</sub> = 10.0 Hz), 131.3 (d, *J*<sub>C-P</sub> = 3.0 Hz), 128.2 (d, *J*<sub>C-P</sub> = 12.0 Hz), 126.5 (d, *J*<sub>C-P</sub> = 9.0 Hz), 123.9, 122.3, 110.0, 107.9 (d, *J*<sub>C-P</sub> = 121.0 Hz), 61.5, 31.7, 21.7, 13.4. **<sup>31</sup>P NMR (162 MHz, CDCl<sub>3</sub>):** δ 21.60. **HRMS** Calcd for C<sub>25</sub>H<sub>24</sub>NNaO<sub>3</sub>P [M + Na]<sup>+</sup> 440.1386, found 440.1382.

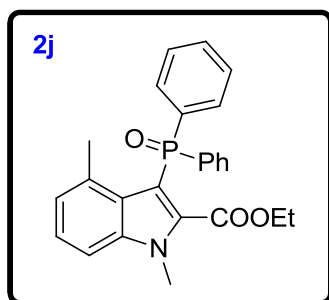

Prepared according to the general procedure. Flash column chromatography on a silica gel (ethyl acetate: petroleum ether, 2: 1) give the product (89% yield) as a yellow oil. **R<sub>f</sub>** (ethyl acetate: petroleum ether, 2:1): 0.32. **<sup>1</sup>H NMR (400 MHz, CDCl<sub>3</sub>)**: δ 7.76 - 7.70 (m, 4H), 7.49 - 7.45 (m, 2H), 7.42 - 7.38 (m, 4H), 7.27 - 7.23 (m, 2H), 6.96 - 6.93 (m, 1H), 3.76 (s, 3H), 3.47 (q, *J* = 7.2 Hz, 2H), 2.73 (s, 3H), 1.11 (t, *J* = 7.2 Hz, 3H). **<sup>13</sup>C NMR (100 MHz, CDCl<sub>3</sub>)**: δ 162.4, 138.2 (d, *J*<sub>C-P</sub> = 10.0 Hz), 138.0, 135.0 (d, *J*<sub>C-P</sub> = 108.0 Hz), 133.7, 132.0 (d, *J*<sub>C-P</sub> = 10.0 Hz), 131.3 (d, *J*<sub>C-P</sub> = 2.0 Hz), 128.1, 128.0 (d, *J*<sub>C-P</sub> = 6.0 Hz), 124.5, 124.3, 107.6, 104.9 (d, *J*<sub>C-P</sub> = 120.0 Hz), 61.9, 31.5, 22.6, 13.6. **<sup>31</sup>P NMR (162 MHz, CDCl<sub>3</sub>)**: δ 22.36. **HRMS** Calcd for C<sub>25</sub>H<sub>24</sub>NNaO<sub>3</sub>P [M + Na]<sup>+</sup> 440.1386, found 440.1398.

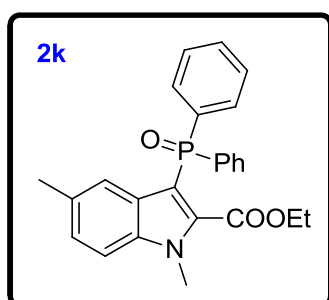

Prepared according to the general procedure. Flash column chromatography on a silica gel (ethyl acetate: petroleum ether, 2: 1) give the product (91% yield) as a white solid. Mp: 77-79 °C. **R<sub>f</sub>** (ethyl acetate: petroleum ether, 2:1): 0.33. **<sup>1</sup>H NMR (400 MHz, CDCl<sub>3</sub>)**: δ 7.79 - 7.76 (m, 4H), 7.52 - 7.48 (m, 2H), 7.45 - 7.40 (m, 4H), 7.30 - 7.27 (m, 1H), 7.15 - 7.11 (m, , 1H), 6.97 (s, 1H), 3.93 (s, 3H), 3.72 (q, *J* = 7.2 Hz, 2H), 2.22 (s, 3H), 1.01 (t, *J* = 7.2 Hz, 3H). **<sup>13</sup>C NMR (100 MHz, CDCl<sub>3</sub>)**: δ 161.5, 136.7 (d, *J*<sub>C-P</sub> = 11.0 Hz), 135.0 (d, *J*<sub>C-P</sub> = 17.0 Hz), 134.8 (d, *J*<sub>C-P</sub> = 109.0 Hz), 131.5 (d, *J*<sub>C-P</sub> = 10.0 Hz), 131.3 (d, *J*<sub>C-P</sub> = 3.0 Hz), 129.0 (d, *J*<sub>C-P</sub> = 9.0 Hz), 128.2 (d, *J*<sub>C-P</sub> = 12.0 Hz), 128.1, 126.5, 109.9, 106.7 (d, *J*<sub>C-P</sub> = 120.0 Hz), 61.5, 31.9, 21.3, 13.4. **<sup>31</sup>P NMR (162 MHz, CDCl<sub>3</sub>)**: δ 22.48. **HRMS** Calcd for C<sub>25</sub>H<sub>24</sub>NNaO<sub>3</sub>P [M + Na]<sup>+</sup> 440.1386, found 440.1398.

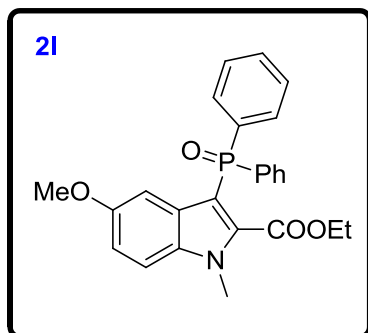

Prepared according to the general procedure. Flash column chromatography on a silica gel (ethyl acetate: petroleum ether, 2: 1) give the product (96% yield) as a white solid. Mp: 145-147 °C.  $R_f$  (ethyl acetate: petroleum ether, 2:1): 0.26.  **$^1\text{H}$  NMR (400 MHz,  $\text{CDCl}_3$ ):**  $\delta$  7.84 - 7.78 (m, 4H), 7.51 - 7.42 (m, 6H), 7.28 (d,  $J$  = 9.6 Hz, 1H), 6.93 (dd,  $J$  = 9.2 Hz, 2.4Hz, 1H), 6.38 (d,  $J$  = 2.0 Hz, 1H), 3.95 (s, 3H), 3.76 (q,  $J$  = 7.2 Hz, 2H), 3.42 (s, 3H), 1.02 (t,  $J$  = 7.2 Hz, 3H).  **$^{13}\text{C}$  NMR (100 MHz,  $\text{CDCl}_3$ ):**  $\delta$  161.3, 155.2, 135.1 (d,  $J_{\text{C-P}}$  = 108.0 Hz), 134.9 (d,  $J_{\text{C-P}}$  = 16.0 Hz), 133.5 (d,  $J_{\text{C-P}}$  = 11.0 Hz), 131.5, 131.4, 131.2 (d,  $J_{\text{C-P}}$  = 3.0 Hz), 129.1 (d,  $J_{\text{C-P}}$  = 9.0 Hz), 128.3, 128.2, 116.4, 111.1, 106.7 (d,  $J_{\text{C-P}}$  = 120.0 Hz), 102.5, 61.4, 55.1, 32.0, 13.3.  **$^{31}\text{P}$  NMR (162 MHz,  $\text{CDCl}_3$ ):**  $\delta$  21.25. **HRMS** Calcd for  $\text{C}_{25}\text{H}_{24}\text{NNaO}_4\text{P}$   $[\text{M} + \text{Na}]^+$  456.1335, found 456.1338.

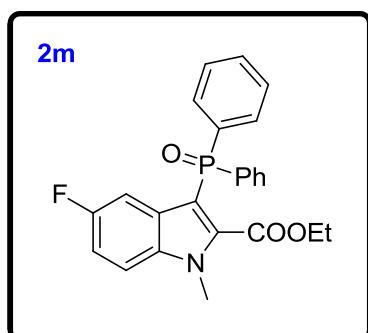

Prepared according to the general procedure. Flash column chromatography on a silica gel (ethyl acetate: petroleum ether, 2: 1) give the product (87% yield) as a white solid. Mp: 152-154 °C.  $R_f$  (ethyl acetate: petroleum ether, 2:1): 0.25.  **$^1\text{H}$  NMR (400 MHz,  $\text{CDCl}_3$ ):**  $\delta$  7.81 - 7.76 (m, 4H), 7.57 - 7.52 (m, 2H), 7.49 - 7.43 (m, 4H), 7.37 - 7.33 (m, 1H), 7.07 (td,  $J$  = 8.8 Hz, 2.4Hz, 1H), 6.70 (dd,  $J$  = 10.0 Hz, 6.4 Hz, 1H), 3.97 (s, 3H), 3.78 (q,  $J$  = 7.2 Hz, 2H), 1.03 (t,  $J$  = 7.2 Hz, 3H).  **$^{13}\text{C}$  NMR (100 MHz,  $\text{CDCl}_3$ ):**  $\delta$  161.2, 158.6 (d,  $J_{\text{C-P}}$  = 237.0 Hz), 136.6 (d,  $J_{\text{C-P}}$  = 16.0 Hz), 134.8 (d,  $J_{\text{C-P}}$  = 11.0 Hz), 133.9 (d,  $J_{\text{C-P}}$  = 109.0 Hz), 131.8 (d,  $J_{\text{C-P}}$  = 3.0 Hz), 131.6, 131.5, 129.1 (d,  $J_{\text{C-P}}$  = 11.0 Hz), 129.0, 128.5, 128.4, 113.8 (d,  $J_{\text{C-P}}$  = 27.0 Hz), 111.4 (d,  $J_{\text{C-P}}$  = 10.0 Hz), 107.6 (d,  $J_{\text{C-P}}$  = 25.0 Hz), 106.8 (d,  $J_{\text{C-P}}$  = 122.0 Hz), 61.9, 32.2, 13.5.  **$^{31}\text{P}$  NMR (162 MHz,  $\text{CDCl}_3$ ):**  $\delta$  22.78.  **$^{19}\text{F}$  NMR (376 MHz,  $\text{CDCl}_3$ ):**  $\delta$  -119.88. **HRMS** Calcd for  $\text{C}_{24}\text{H}_{21}\text{FNNaO}_3\text{P}$   $[\text{M} + \text{Na}]^+$  444.1135, found 444.1128.

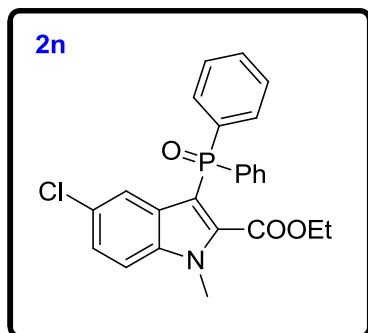

Prepared according to the general procedure. Flash column chromatography on a silica gel (ethyl acetate: petroleum ether, 2: 1) give the product (90% yield) as a white solid. Mp: 149-151 °C. **R<sub>f</sub>** (ethyl acetate: petroleum ether, 2:1): 0.25. **<sup>1</sup>H NMR (400 MHz, CDCl<sub>3</sub>):** δ 7.81 - 7.75 (m, 4H), 7.55 - 7.51 (m, 2H), 7.47 - 7.43 (m, 4H), 7.33 - 7.22 (m, 2H), 7.19 (s, 1H), 3.94 (s, 3H), 3.75 (q, *J* = 7.2 Hz, 2H), 1.03 (t, *J* = 7.2 Hz, 3H). **<sup>13</sup>C NMR (100 MHz, CDCl<sub>3</sub>):** δ 161.4, 136.8 (d, *J*<sub>C-P</sub> = 11.0 Hz), 136.5 (d, *J*<sub>C-P</sub> = 16.0 Hz), 134.5 (d, *J*<sub>C-P</sub> = 110.0 Hz), 131.9 (d, *J*<sub>C-P</sub> = 2.0 Hz), 131.8 (d, *J*<sub>C-P</sub> = 10.0 Hz), 129.9 (d, *J*<sub>C-P</sub> = 9.0 Hz), 128.7, 128.6, 128.1, 125.5, 122.6, 111.7, 107.5 (d, *J*<sub>C-P</sub> = 119.0 Hz), 62.2, 32.4, 13.7. **<sup>31</sup>P NMR (162 MHz, CDCl<sub>3</sub>):** δ 22.03. **HRMS** Calcd for C<sub>24</sub>H<sub>21</sub>ClNNaO<sub>3</sub>P [M + Na]<sup>+</sup> 460.0840, found 460.0828.

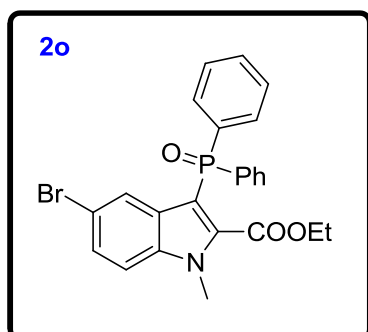

Prepared according to the general procedure. Flash column chromatography on a silica gel (ethyl acetate: petroleum ether, 2: 1) give the product (81% yield) as a white solid. Mp: 162-164 °C. **R<sub>f</sub>** (ethyl acetate: petroleum ether, 2:1): 0.22. **<sup>1</sup>H NMR (400 MHz, CDCl<sub>3</sub>):** δ 7.78 - 7.74 (m, 4H), 7.56 - 7.52 (m, 2H), 7.48 - 7.43 (m, 4H), 7.40 - 7.36 (m, 1H), 7.31 - 7.25 (m, 2H), 3.94 (s, 3H), 3.76 (q, *J* = 7.2 Hz, 2H), 1.03 (t, *J* = 7.2 Hz, 3H). **<sup>13</sup>C NMR (100 MHz, CDCl<sub>3</sub>):** δ 161.1, 136.8 (d, *J*<sub>C-P</sub> = 10.0 Hz), 136.1 (d, *J*<sub>C-P</sub> = 6.0 Hz), 134.2 (d, *J*<sub>C-P</sub> = 109.0 Hz), 131.7 (d, *J*<sub>C-P</sub> = 2.0 Hz), 131.6, 131.5, 130.2 (d, *J*<sub>C-P</sub> = 8.0 Hz), 128.4, 128.3, 127.8, 125.5, 115.5, 111.7, 107.3 (d, *J*<sub>C-P</sub> = 119.0 Hz), 61.9, 32.1, 13.4. **<sup>31</sup>P NMR (162 MHz, CDCl<sub>3</sub>):** δ 21.99. **HRMS** Calcd for C<sub>24</sub>H<sub>21</sub>BrNNaO<sub>3</sub>P [M + Na]<sup>+</sup> 504.0335, found 504.0325.

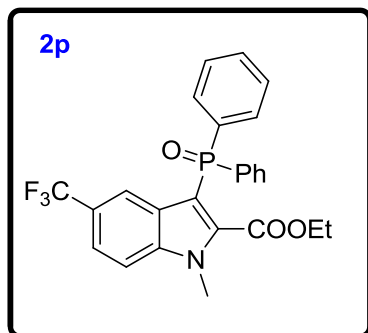

Prepared according to the general procedure. Flash column chromatography on a silica gel (ethyl acetate: petroleum ether, 2: 1) give the product (81% yield) as a white solid. Mp: 158-160 °C. **R<sub>f</sub>** (ethyl acetate: petroleum ether, 2:1): 0.35. **<sup>1</sup>H NMR (400 MHz, CDCl<sub>3</sub>):** δ 7.81 - 7.75 (m, 4H), 7.57 - 7.53 (m, 2H), 7.51 - 7.44 (m, 7H), 7.31 - 7.27 (m, 1H), 4.01 (s, 3H), 3.82 (q, *J* = 7.2 Hz, 2H), 1.04 (t, *J* = 7.2 Hz, 3H). **<sup>13</sup>C NMR (100 MHz, CDCl<sub>3</sub>):** δ 161.1, 139.4 (d, *J*<sub>C-P</sub> = 10.0 Hz), 137.1 (d, *J*<sub>C-P</sub> = 15.0 Hz), 134.2 (d, *J*<sub>C-P</sub> = 110.0 Hz), 132.0, 131.8 (d, *J*<sub>C-P</sub> = 3.0 Hz), 131.6, 131.5, 131.4, 131.3, 128.6, 128.5 (d, *J*<sub>C-P</sub> = 5.0 Hz), 128.4, 127.9 (d, *J*<sub>C-P</sub> = 9.0 Hz), 124.4 (d, *J*<sub>C-P</sub> = 270.0 Hz), 124.3 (q, *J*<sub>C-P</sub> = 32.0 Hz), 121.2 (d, *J*<sub>C-P</sub> = 4.0 Hz), 110.9, 109.2 (d, *J*<sub>C-P</sub> = 118.0 Hz), 62.1, 32.2, 13.4. **<sup>31</sup>P NMR (162 MHz, CDCl<sub>3</sub>):** δ 21.35. **HRMS** Calcd for C<sub>25</sub>H<sub>21</sub>F<sub>3</sub>NNaO<sub>3</sub>P [M + Na]<sup>+</sup> 494.1103, found 494.1104.

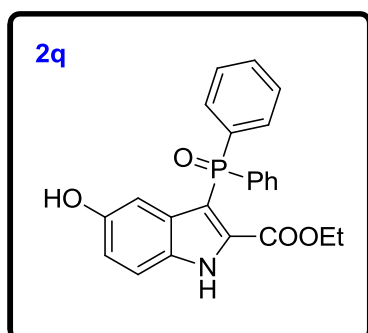

Prepared according to the general procedure. Flash column chromatography on a silica gel (ethyl acetate: petroleum ether, 2: 1) give the product (61% yield) as a yellow oil. **R<sub>f</sub>** (ethyl acetate: petroleum ether, 2:1): 0.18. **<sup>1</sup>H NMR (400 MHz, DMSO):** δ 12.55 (brs, 1H), 9.03 (brs, 1H), 7.70 - 7.64 (m, 4H), 7.61 - 7.47 (m, 6H), 7.38 (d, *J* = 7.2 Hz, 1H), 7.03 (d, *J* = 2.0 Hz, 1H), 6.85 (dd, *J* = 8.8 Hz, 2.4 Hz, 1H), 3.77 (q, *J* = 7.2 Hz, 2H), 0.88 (t, *J* = 7.2 Hz, 3H). **<sup>13</sup>C NMR (100 MHz, DMSO):** δ 160.1, 152.2, 135.9, 134.8, 134.8, 131.5, 131.3, 131.2, 131.1, 130.9, 130.8, 128.3, 128.2, 116.4, 113.4, 105.8, 60.7, 13.5. **<sup>31</sup>P NMR (162 MHz, DMSO):** δ 22.06. **HRMS** Calcd for C<sub>23</sub>H<sub>20</sub>NNaO<sub>4</sub>P [M + Na]<sup>+</sup> 428.1022, found 428.1020.

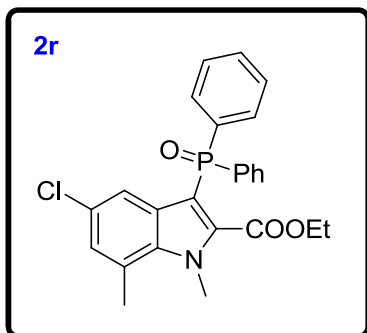

Prepared according to the general procedure. Flash column chromatography on a silica gel (ethyl acetate: petroleum ether, 2: 1) give the product (89% yield) as a white solid. Mp: 187-189 °C. **R<sub>f</sub>** (ethyl acetate: petroleum ether, 2:1): 0.34. **<sup>1</sup>H NMR (400 MHz, CDCl<sub>3</sub>):** δ 7.78 - 7.73 (m, 4H), 7.54 - 7.49 (m, 2H), 7.46 - 7.43 (m, 4H), 7.23 (s, 1H), 6.94 (s, 1H), 4.08 (s, 3H), 3.72 (q, *J* = 7.2 Hz, 2H), 2.71 (s, 3H), 1.06 (t, *J* = 7.2 Hz, 3H). **<sup>13</sup>C NMR (100 MHz, CDCl<sub>3</sub>):** δ 161.7, 138.1 (d, *J*<sub>C-P</sub> = 16.0 Hz), 135.4 (d, *J*<sub>C-P</sub> = 10.0 Hz), 133.8 (d, *J*<sub>C-P</sub> = 109.0 Hz), 131.6, 131.5, 130.4 (d, *J*<sub>C-P</sub> = 8.0 Hz), 128.3, 128.2, 127.4, 127.2, 123.5, 119.9, 107.5 (d, *J*<sub>C-P</sub> = 119.0 Hz), 62.0, 34.9, 20.1, 13.7. **<sup>31</sup>P NMR (162 MHz, CDCl<sub>3</sub>):** δ 21.98. **HRMS** Calcd for C<sub>25</sub>H<sub>23</sub>ClINNaO<sub>3</sub>P [M + Na]<sup>+</sup> 474.0996, found 474.0988.

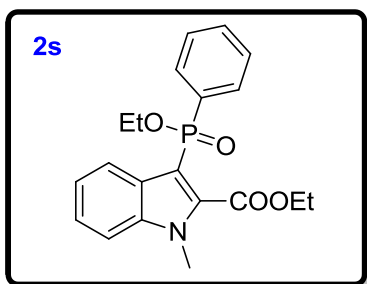

Prepared according to the general procedure. Flash column chromatography on a silica gel (ethyl acetate: petroleum ether, 2: 1) give the product (69% yield) as a yellow oil. **R<sub>f</sub>** (ethyl acetate: petroleum ether, 2:1): 0.33. **<sup>1</sup>H NMR (400 MHz, CDCl<sub>3</sub>):** δ 8.25 (d, *J* = 8.0 Hz, 1H), 7.88 - 7.82 (m, 2H), 7.48 - 7.36 (m, 5H), 7.30 - 7.25 (m, 1H), 4.30 - 4.22 (m, 1H), 4.19 - 4.05 (m, 1H), 3.94 (s, 3H), 1.37 (t, *J* = 7.2 Hz, 3H), 1.21 (t, *J* = 7.2 Hz, 3H). **<sup>13</sup>C NMR (100 MHz, CDCl<sub>3</sub>):** δ 161.7, 138.0 (d, *J*<sub>C-P</sub> = 12.0 Hz), 135.6 (d, *J*<sub>C-P</sub> = 20.0 Hz), 133.9 (d, *J*<sub>C-P</sub> = 146.0 Hz), 131.4 (d, *J*<sub>C-P</sub> = 2.0 Hz), 130.7, 130.6, 128.3, 128.2, 127.9, 124.7, 123.1, 122.3, 110.3, 106.6 (d, *J*<sub>C-P</sub> = 157.0 Hz), 61.8, 60.5 (d, *J*<sub>C-P</sub> = 6.0 Hz), 16.4 (d, *J*<sub>C-P</sub> = 6.0 Hz), 13.6. **<sup>31</sup>P NMR (162 MHz, CDCl<sub>3</sub>):** δ 29.06. **HRMS** Calcd for C<sub>20</sub>H<sub>22</sub>NNaO<sub>4</sub>P [M + Na]<sup>+</sup> 394.1179, found 394.1180.



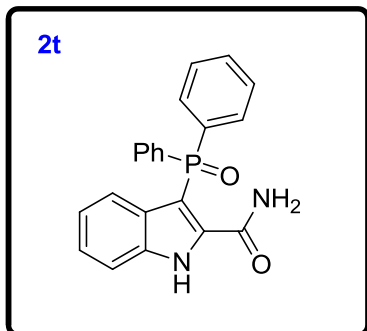

Prepared according to the general procedure. Flash column chromatography on a silica gel (ethyl acetate: petroleum ether, 2: 1) give the product (22% yield) as a yellow oil. **R<sub>f</sub>** (ethyl acetate: petroleum ether, 4:1): 0.35. **<sup>1</sup>H NMR (400 MHz, DMSO):** δ 12.62 (brs, 1H), 10.56 (brs, 1H), 7.82 (brs, 1H), 7.69 - 7.64 (m, 2H), 7.61 - 7.53 (m, 9H), 7.21 - 7.17 (m, 1H), 6.87 - 6.82 (m, 1H), 6.37 (d, *J* = 8.4 Hz, 1H). **<sup>13</sup>C NMR (100 MHz, DMSO):** δ 161.6, 139.6 (d, *J*<sub>C-P</sub> = 16.0 Hz), 135.9 (d, *J*<sub>C-P</sub> = 12.0 Hz), 133.9, 133.0 (d, *J*<sub>C-P</sub> = 2.0 Hz), 132.8, 131.8, 131.7, 129.5, 129.4, 129.3, 129.2, 124.4, 121.9, 121.3, 113.8, 101.7 (d, *J*<sub>C-P</sub> = 119.0 Hz). **<sup>31</sup>P NMR (162 MHz, DMSO):** δ 26.10. **HRMS** Calcd for C<sub>21</sub>H<sub>18</sub>N<sub>2</sub>O<sub>2</sub>P [M + H]<sup>+</sup> 361.1100, found 361.1105.

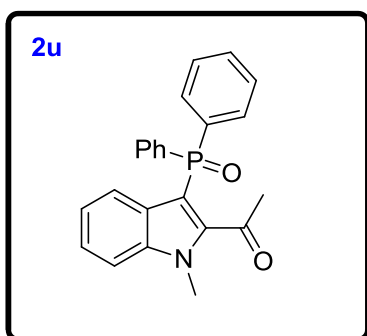

Prepared according to the general procedure. Flash column chromatography on a silica gel (ethyl acetate: petroleum ether, 2: 1) give the product (95% yield) as a white solid. Mp: 191-193 °C. **R<sub>f</sub>** (ethyl acetate: petroleum ether, 2:1): 0.35. **<sup>1</sup>H NMR (400 MHz, CDCl<sub>3</sub>):** δ 7.78 - 7.72 (m, 4H), 7.51 - 7.48 (m, 2H), 7.43 - 7.36 (m, 5H), 7.28 - 7.24 (m, 1H), 6.96 (t, *J* = 7.6 Hz, 1H), 6.79 (t, *J* = 8.4 Hz, 1H), 3.75 (s, 3H), 2.61 (s, 3H). **<sup>13</sup>C NMR (100 MHz, CDCl<sub>3</sub>):** δ 198.1, 145.3 (d, *J*<sub>C-P</sub> = 17.0 Hz), 137.5 (d, *J*<sub>C-P</sub> = 11.0 Hz), 133.9 (d, *J*<sub>C-P</sub> = 109.0 Hz), 131.7 (d, *J*<sub>C-P</sub> = 2.0 Hz), 131.6 (d, *J*<sub>C-P</sub> = 11.0 Hz), 128.4 (d, *J*<sub>C-P</sub> = 13.0 Hz), 127.6 (d, *J*<sub>C-P</sub> = 10.0 Hz), 123.9, 121.8, 110.4, 104.2 (d, *J*<sub>C-P</sub> = 120.0 Hz), 33.5, 31.3. **<sup>31</sup>P NMR (162 MHz, CDCl<sub>3</sub>):** δ 21.36. **HRMS** Calcd for C<sub>23</sub>H<sub>20</sub>NNaO<sub>2</sub>P [M + Na]<sup>+</sup> 396.1124, found 396.1123.

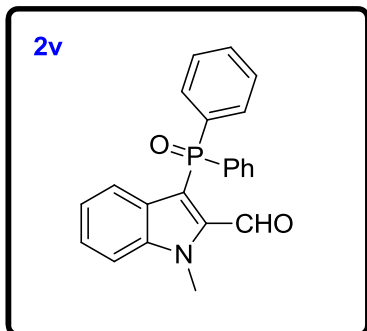

Prepared according to the general procedure. Flash column chromatography on a silica gel (ethyl acetate: petroleum ether, 2: 1) give the product (96% yield) as a yellow oil. **R<sub>f</sub>** (ethyl acetate: petroleum ether, 2:1): 0.28. **<sup>1</sup>H NMR (400 MHz, CDCl<sub>3</sub>)**: δ 10.83 (brs, 1H), 7.77 - 7.71 (m, 4H), 7.60 - 7.55 (m, 2H), 7.50 - 7.45 (m, 5H), 7.42 - 7.37 (m, 1H), 7.03 - 6.98 (m, 1H), 6.80 (d, *J* = 8.4 Hz, 1H), 4.19 (s, 3H). **<sup>13</sup>C NMR (100 MHz, CDCl<sub>3</sub>)**: δ 186.8, 140.0 (d, *J*<sub>C-P</sub> = 15.0 Hz), 139.4 (d, *J*<sub>C-P</sub> = 12.0 Hz), 133.8 (d, *J*<sub>C-P</sub> = 108.0 Hz), 132.2 (d, *J*<sub>C-P</sub> = 3.0 Hz), 132.1, 132.0, 131.8, 131.7, 129.0, 128.8, 128.7, 127.9, 127.8, 126.6, 122.8, 122.4, 114.8 (d, *J*<sub>C-P</sub> = 115.0 Hz), 111.0, 32.8. **<sup>31</sup>P NMR (162 MHz, CDCl<sub>3</sub>)**: δ 23.19. **HRMS** Calcd for C<sub>22</sub>H<sub>18</sub>NNaO<sub>2</sub>P [M + Na]<sup>+</sup> 382.0967, found 382.0957.

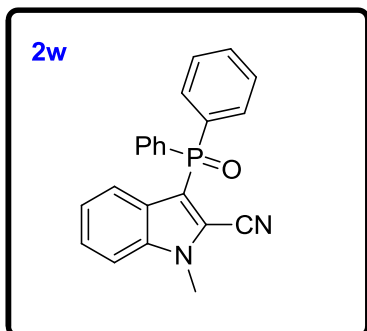

Prepared according to the general procedure. Flash column chromatography on a silica gel (ethyl acetate: petroleum ether, 2: 1) give the product (93% yield) as a white solid. Mp: 201-203 °C. **R<sub>f</sub>** (ethyl acetate: petroleum ether, 2:1): 0.35. **<sup>1</sup>H NMR (400 MHz, CDCl<sub>3</sub>)**: δ 7.85 - 7.74 (m, 4H), 7.68 - 7.61 (m, 1H), 7.58 - 7.54 (m, 2H), 7.50 - 7.44 (m, 4H), 7.41 - 7.38 (m, 2H), 7.18 - 7.12 (m, 1H), 3.88 (d, *J* = 6.0 Hz, 3H). **<sup>13</sup>C NMR (100 MHz, CDCl<sub>3</sub>)**: δ 138.2 (d, *J*<sub>C-P</sub> = 11.0 Hz), 132.6, 132.3 (d, *J*<sub>C-P</sub> = 3.0 Hz), 128.5 (d, *J*<sub>C-P</sub> = 12.0 Hz), 126.4, 122.9, 122.8, 110.9 (d, *J*<sub>C-P</sub> = 1.0 Hz), 110.4, 76.7 (d, *J*<sub>C-P</sub> = 3.0 Hz), 31.8. **<sup>31</sup>P NMR (162 MHz, CDCl<sub>3</sub>)**: δ 19.71. **HRMS** Calcd for C<sub>22</sub>H<sub>17</sub>N<sub>2</sub>NaOP [M + Na]<sup>+</sup> 379.0971, found 379.0958.

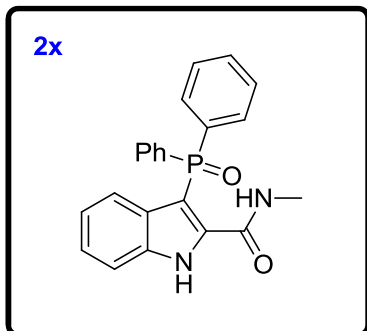

Prepared according to the general procedure. Flash column chromatography on a silica gel (ethyl acetate: petroleum ether, 2: 1) give the product (86% yield) as a yeollow oil.  $R_f$  (ethyl acetate: petroleum ether, 4:1): 0.38.  $^1\text{H}$  NMR (400 MHz,  $\text{CDCl}_3$ ):  $\delta$  11.43 (brs, 1H), 11.29 (brs, 1H), 7.73 - 7.67 (m, 4H), 7.62 - 7.55 (m, 3H), 7.48 - 7.44 (m, 4H), 7.26 - 7.21 (m, 1H), 6.92 - 6.87 (m, 1H), 6.57 (d,  $J$  = 8.0 Hz, 1H), 3.07 (d,  $J$  = 4.0 Hz, 3H).  $^{13}\text{C}$  NMR (100 MHz,  $\text{CDCl}_3$ ):  $\delta$  160.0, 139.2 (d,  $J_{\text{C-P}}$  = 15.0 Hz), 133.3, 132.3 (d,  $J_{\text{C-P}}$  = 3.0 Hz), 132.1, 132.0, 131.9, 131.8, 129.5 (d,  $J_{\text{C-P}}$  = 12.0 Hz), 128.8, 128.7, 124.3, 121.7, 121.6, 112.8, 101.1 (d,  $J_{\text{C-P}}$  = 121.0 Hz), 26.9.  $^{31}\text{P}$  NMR (162 MHz,  $\text{CDCl}_3$ ):  $\delta$  28.39. HRMS Calcd for  $\text{C}_{22}\text{H}_{20}\text{N}_2\text{O}_2\text{P}$   $[\text{M} + \text{H}]^+$  375.1257, found 375.1263.

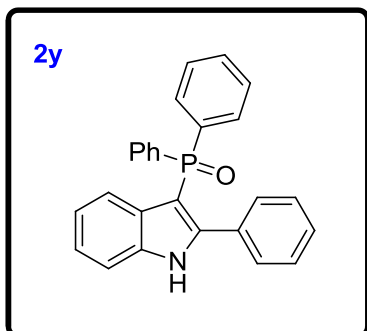

Prepared according to the general procedure. Flash column chromatography on a silica gel (ethyl acetate: petroleum ether, 2: 1) give the product (78% yield) as a white solid. Mp: 173-175 °C.  $R_f$  (ethyl acetate: petroleum ether, 2:1): 0.50.  $^1\text{H}$  NMR (400 MHz,  $\text{d}_6\text{-DMSO}$ ):  $\delta$  12.31 (brs, 1H), 8.33 (s, 1H), 7.65 - 7.59 (m, 4H), 7.54 - 7.48 (m, 3H), 7.43 - 7.38 (m, 2H), 7.34 - 7.30 (m, 4H), 7.20 - 7.10 (m, 4H), 6.82 (t,  $J$  = 7.6 Hz, 1H), 6.52 (d,  $J$  = 8.4 Hz, 1H).  $^{13}\text{C}$  NMR (100 MHz,  $\text{d}_6\text{-DMSO}$ ):  $\delta$  147.1 (d,  $J_{\text{C-P}}$  = 18.0 Hz), 137.0 (d,  $J_{\text{C-P}}$  = 12.0 Hz), 135.5 (d,  $J_{\text{C-P}}$  = 106.0 Hz), 132.0, 131.9, 131, 131.5, 130.2, 130.0 (d,  $J_{\text{C-P}}$  = 5.0 Hz), 128.8, 128.6 (d,  $J_{\text{C-P}}$  = 12.0 Hz), 128.0, 122.5, 120.7 (d,  $J_{\text{C-P}}$  = 3.0 Hz), 101.0 (d,  $J_{\text{C-P}}$  = 124.0 Hz), 79.6.  $^{31}\text{P}$  NMR (162 MHz,  $\text{d}_6\text{-DMSO}$ ):  $\delta$  16.87. HRMS Calcd for  $\text{C}_{26}\text{H}_{21}\text{NOP}$   $[\text{M} + \text{H}]^+$  394.1355, found 394.1362.

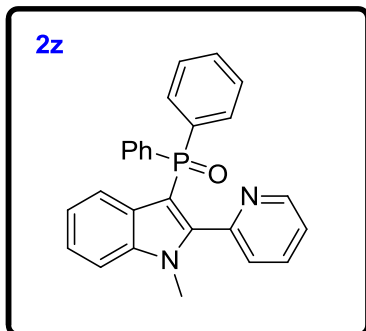

Prepared according to the general procedure. Flash column chromatography on a silica gel (ethyl acetate: petroleum ether, 2: 1) give the product (73% yield) as a yellow oil. **R<sub>f</sub>** (ethyl acetate: petroleum ether, 2:1): 0.39. **<sup>1</sup>H NMR (400 MHz, CDCl<sub>3</sub>)**: δ 8.50 (d, *J* = 4.4 Hz, 1H), 7.71 - 7.65 (m, 4H), 7.52 (d, *J* = 7.6 Hz, 1H), 7.42 (d, *J* = 8.4 Hz, 1H), 7.38 - 7.31 (m, 3H), 7.30 - 7.22 (m, 5H), 7.05 - 7.01 (m, 1H), 6.99 - 6.97 (m, 2H), 3.70 (s, 3H). **<sup>13</sup>C NMR (100 MHz, CDCl<sub>3</sub>)**: δ 149.8, 148.8, 145.8 (d, *J*<sub>C-P</sub> = 18.0 Hz), 137.9 (d, *J*<sub>C-P</sub> = 11.0 Hz), 135.7, 134.5 (d, *J*<sub>C-P</sub> = 107.0 Hz), 131.7, 131.6, 131.0 (d, *J*<sub>C-P</sub> = 3.0 Hz), 129.0 (d, *J*<sub>C-P</sub> = 9.0 Hz), 128.2 (d, *J*<sub>C-P</sub> = 2.0 Hz), 128.1, 123.1, 121.9, 110.0, 103.4 (d, *J*<sub>C-P</sub> = 125.0 Hz), 31.3. **<sup>31</sup>P NMR (162 MHz, CDCl<sub>3</sub>)**: δ 18.72. **HRMS** Calcd for C<sub>26</sub>H<sub>22</sub>N<sub>2</sub>OP [M + H]<sup>+</sup> 409.1464, found 409.1471.

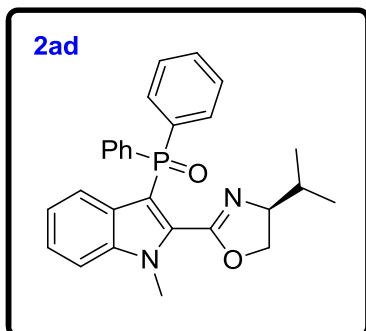

Prepared according to the general procedure. Flash column chromatography on a silica gel (ethyl acetate: petroleum ether, 2: 1) give the product (77% yield) as a yellow oil. **R<sub>f</sub>** (ethyl acetate: petroleum ether, 2:1): 0.45. **<sup>1</sup>H NMR (400 MHz, CDCl<sub>3</sub>)**: δ 7.88 - 7.82 (m, 4H), 7.51 - 7.39 (m, 7H), 7.36 - 7.26 (m, 2H), 7.03 (t, *J* = 8.0 Hz, 1H), 3.97 (s, 3H), 3.58 - 3.42 (m, 3H), 1.61 - 1.48 (m, 1H), 0.95 (d, *J* = 4.0 Hz, 1H), 0.82 (t, *J* = 8.0 Hz, 3H). **<sup>13</sup>C NMR (100 MHz, CDCl<sub>3</sub>)**: δ 156.5, 138.3 (d, *J*<sub>C-P</sub> = 11.0 Hz), 134.7 (d, *J*<sub>C-P</sub> = 108.0 Hz), 132.8 (d, *J*<sub>C-P</sub> = 16.0 Hz), 131.7, 131.6 (d, *J*<sub>C-P</sub> = 3.0 Hz), 131.5, 131.2 (d, *J*<sub>C-P</sub> = 3.0 Hz), 131.2 (d, *J*<sub>C-P</sub> = 2.0 Hz), 129.1 (d, *J*<sub>C-P</sub> = 9.0 Hz), 128.3 (d, *J*<sub>C-P</sub> = 5.0 Hz), 128.2 (d, *J*<sub>C-P</sub> = 5.0 Hz), 124.2, 122.8, 121.7, 110.2, 106.7 (d, *J*<sub>C-P</sub> = 122.0 Hz), 73.3, 69.9, 32.7, 31.7, 19.1, 18.7. **<sup>31</sup>P NMR (162 MHz, CDCl<sub>3</sub>)**: δ 20.32.

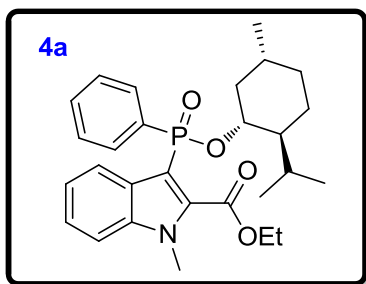

Prepared according to the general procedure. Flash column chromatography on a silica gel (ethyl acetate: petroleum ether, 1: 2) give the product (88% yield) as a white solid. Mp: 65-67 °C.  $R_f$  (ethyl acetate: petroleum ether, 1:2): 0.37.  $[\alpha]_D^{16} = +13.0$  (c 1.00,  $\text{CHCl}_3$ ).  $^1\text{H NMR}$  (400 MHz,  $\text{CDCl}_3$ ):  $\delta$  8.35 (d,  $J = 8.4$  Hz, 1H), 7.84 - 7.78 (m, 2H), 7.46 - 7.35 (m, 5H), 7.28 - 7.23 (m, 1H), 4.44 - 4.40 (m, 1H), 4.25 - 4.09 (m, 2H), 3.96 (s, 3H), 2.13 - 2.08 (m, 1H), 1.92 (d,  $J = 12$  Hz, 1H), 1.66 - 1.61 (m, 2H), 1.49 - 1.42 (t,  $J = 11.2$  Hz, 1H), 1.37 - 1.31 (m, 1H), 1.24 - 1.14 (m, 4H), 1.00 - 0.83 (m, 2H), 0.81 (d,  $J = 6.8$  Hz, 3H), 0.79 (d,  $J = 6.8$  Hz, 3H), 0.51 (d,  $J = 6.8$  Hz, 3H).  $^{13}\text{C NMR}$  (100 MHz,  $\text{CDCl}_3$ ):  $\delta$  161.6, 138.1 (d,  $J_{\text{C-P}} = 12.0$  Hz), 135.8 (d,  $J_{\text{C-P}} = 143.0$  Hz), 134.6 (d,  $J_{\text{C-P}} = 20.0$  Hz), 131.1 (d,  $J_{\text{C-P}} = 3.0$  Hz), 130.6 (d,  $J_{\text{C-P}} = 11.0$  Hz), 128.6 (d,  $J_{\text{C-P}} = 8.0$  Hz), 127.9 (d,  $J_{\text{C-P}} = 13.0$  Hz), 124.7, 123.8, 122.0, 110.1, 108.0 (d,  $J_{\text{C-P}} = 159.0$  Hz), 76.3 (d,  $J_{\text{C-P}} = 7.0$  Hz), 61.5, 49.0 (d,  $J_{\text{C-P}} = 5.0$  Hz), 43.4, 34.1, 31.8, 31.5, 25.2, 22.7, 22.0, 21.1, 15.3, 13.7.  $^{31}\text{P NMR}$  (162 MHz,  $\text{CDCl}_3$ ):  $\delta$  28.14. HRMS Calcd for  $\text{C}_{28}\text{H}_{37}\text{NO}_4\text{P}$   $[\text{M} + \text{H}]^+$  482.2455, found 482.2458.

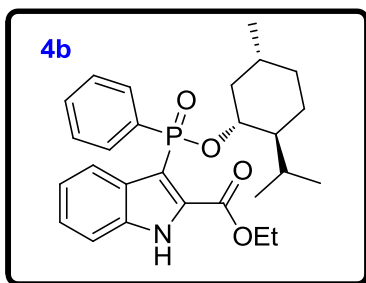

Prepared according to the general procedure. Flash column chromatography on a silica gel (ethyl acetate: petroleum ether, 1: 2) give the product (65% yield) as a white solid. Mp: 232-234 °C.  $R_f$  (ethyl acetate: petroleum ether, 1:2): 0.25.  $[\alpha]_D^{16} = +2.0$  (c 1.00,  $\text{CHCl}_3$ ).  $^1\text{H NMR}$  (400 MHz,  $\text{CDCl}_3$ ):  $\delta$  10.61 (brs, 1H), 8.58 (d,  $J = 8.0$  Hz, 1H), 7.83 - 7.77 (m, 2H), 7.44 - 7.40 (m, 1H), 7.35 - 7.30 (m, 3H), 7.27 - 7.23 (m, 1H), 4.49 - 4.40 (m, 1H), 4.07 - 4.03 (m, 2H), 2.18 - 2.12 (m, 1H), 1.92 (d,  $J = 10.4$  Hz, 1H), 1.63 - 1.61 (m, 2H), 1.51 (t,  $J = 11.2$  Hz, 1H), 1.31 - 1.16 (m, 2H), 1.04 - 0.77 (m, 11H), 0.51 (d,  $J = 6.8$  Hz, 3H).  $^{13}\text{C NMR}$  (100 MHz,  $\text{CDCl}_3$ ):  $\delta$  160.5, 136.7 (d,  $J_{\text{C-P}} = 145.0$  Hz), 133.6 (d,  $J_{\text{C-P}} = 12.0$  Hz), 134.6, 131.4, 131.2 (d,  $J_{\text{C-P}} = 3.0$  Hz), 130.8, 130.7, 130.6, 130.5, 127.9, 127.8, 125.7, 124.6, 122.3, 111.8, 109.6 (d,  $J_{\text{C-P}} = 156.0$  Hz), 76.4 (d,  $J_{\text{C-P}} = 7.0$  Hz), 61.6, 49.0 (d,  $J_{\text{C-P}} = 5.0$  Hz), 43.6, 34.1, 31.5, 25.4, 22.7, 22.0, 21.1, 15.3, 13.9.  $^{31}\text{P NMR}$  (162 MHz,  $\text{CDCl}_3$ ):  $\delta$  29.26. HRMS Calcd for  $\text{C}_{27}\text{H}_{35}\text{NO}_4\text{P}$   $[\text{M} + \text{H}]^+$  468.2298, found 468.2291.

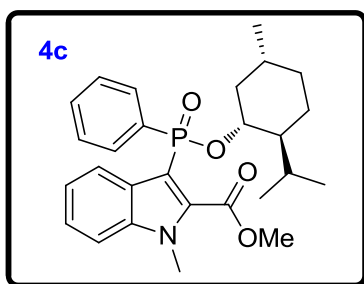

Prepared according to the general procedure. Flash column chromatography on a silica gel (ethyl acetate: petroleum ether, 1: 2) give the product (86% yield) as a white solid. Mp: 60-62 °C.  $R_f$  (ethyl acetate: petroleum ether, 1:2): 0.22.  $[\alpha]_D^{16} = +85.0$  ( $c$  1.00,  $\text{CHCl}_3$ ).  $^1\text{H NMR}$  (400 MHz,  $\text{CDCl}_3$ ):  $\delta$  7.89 - 7.78 (m, 3H), 7.49 - 7.44 (m, 1H), 7.48 - 7.37 (m, 3H), 7.34 - 7.26 (m, 1H), 4.34 - 4.25 (m, 1H), 3.73 (s, 3H), 2.80 (s, 3H), 2.06 - 1.98 (m, 2H), 1.63 - 1.60 (m, 2H), 1.42 (t,  $J = 11.2$  Hz, 1H), 1.35 - 1.30 (m, 1H), 1.26 - 1.20 (m, 1H), 0.99 - 0.82 (m, 2H), 0.81 - 0.77 (m, 3H), 0.73 (d,  $J = 7.2$  Hz, 3H), 0.46 (d,  $J = 6.8$  Hz, 3H).  $^{13}\text{C NMR}$  (100 MHz,  $\text{CDCl}_3$ ):  $\delta$  161.8, 138.1 (d,  $J_{\text{C-P}} = 13.0$  Hz), 135.6 (d,  $J_{\text{C-P}} = 143.0$  Hz), 134.0 (d,  $J_{\text{C-P}} = 21.0$  Hz), 132.3, 131.1 (d,  $J_{\text{C-P}} = 3.0$  Hz), 130.8, 130.5, 130.4, 128.7, 128.3, 127.9, 127.8, 124.8, 123.7, 122.1, 110.2, 108.8 (d,  $J_{\text{C-P}} = 159.0$  Hz), 76.2 (d,  $J_{\text{C-P}} = 7.0$  Hz), 68.0, 49.0 (d,  $J_{\text{C-P}} = 6.0$  Hz), 43.3, 34.0, 31.7, 31.4, 25.2, 22.9, 21.9, 21.0, 15.3.  $^{31}\text{P NMR}$  (162 MHz,  $\text{CDCl}_3$ ):  $\delta$  28.01. **HRMS** Calcd for  $\text{C}_{27}\text{H}_{35}\text{NO}_4\text{P}$   $[\text{M} + \text{H}]^+$  468.2298, found 468.2292.

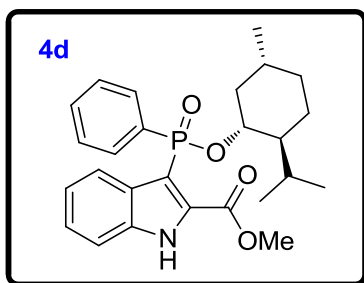

Prepared according to the general procedure. Flash column chromatography on a silica gel (ethyl acetate: petroleum ether, 1: 2) give the product (67% yield) as a white solid. Mp: 227-229 °C.  $R_f$  (ethyl acetate: petroleum ether, 1:2): 0.19.  $[\alpha]_D^{16} = -110.0$  ( $c$  1.00,  $\text{CHCl}_3$ ).  $^1\text{H NMR}$  (400 MHz,  $\text{CDCl}_3$ ):  $\delta$  10.49 (brs, 1H), 8.56 - 8.53 (m, 1H), 7.85 - 7.79 (m, 2H), 7.51 - 7.40 (m, 1H), 7.36 - 7.31 (m, 3H), 7.28 - 7.23 (m, 1H), 4.44 - 4.41 (m, 1H), 3.54 (s, 3H), 2.23 - 2.10 (m, 1H), 1.87 - 1.84 (m, 1H), 1.67 - 1.51 (m, 3H), 1.26 - 1.17 (m, 2H), 1.02 - 0.87 (m, 2H), 0.82 (d,  $J = 6.8$  Hz, 3H), 0.76 (d,  $J = 6.4$  Hz, 3H), 0.57 (d,  $J = 6.4$  Hz, 3H).  $^{13}\text{C NMR}$  (100 MHz,  $\text{CDCl}_3$ ):  $\delta$  160.8, 136.2, 136.0, 134.7, 131.6, 131.4, 130.8, 130.6, 130.4, 130.3, 127.8, 127.7, 125.4, 124.2, 122.1, 112.3, 109.1 (d,  $J_{\text{C-P}} = 156.0$  Hz), 76.4 (d,  $J_{\text{C-P}} = 6.0$  Hz), 61.5, 48.9 (d,  $J_{\text{C-P}} = 5.0$  Hz), 43.5, 34.0, 31.4, 25.3, 22.6, 21.9, 21.0, 15.2.  $^{31}\text{P NMR}$  (162 MHz,  $\text{CDCl}_3$ ):  $\delta$  28.54. **HRMS** Calcd for  $\text{C}_{27}\text{H}_{35}\text{NO}_4\text{P}$   $[\text{M} + \text{H}]^+$  468.2298, found 468.2291. **HRMS** Calcd for  $\text{C}_{26}\text{H}_{33}\text{NO}_4\text{P}$   $[\text{M} + \text{H}]^+$  454.2142, found 454.2147.

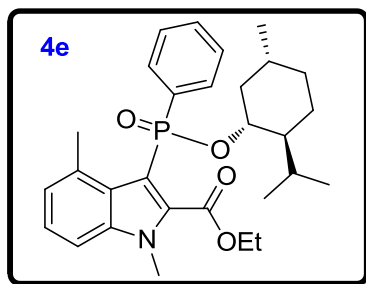

Prepared according to the general procedure. Flash column chromatography on a silica gel (ethyl acetate: petroleum ether, 1: 2) give the product (80% yield) as a yellow oil.  $R_f$  (ethyl acetate: petroleum ether, 1:2): 0.39.  $[\alpha]_D^{16} = -8.0$  (c 1.00,  $\text{CHCl}_3$ ).  $^1\text{H NMR}$  (400 MHz,  $\text{CDCl}_3$ ):  $\delta$  7.92 - 7.86 (m, 2H), 7.47 - 7.35 (m, 3H), 7.19 - 7.14 (m, 2H), 7.40 - 7.37 (m, 2H), 7.34 (s, 2H), 4.49 - 4.39 (m, 1H), 4.24 - 4.07 (m, 2H), 3.96 (s, 3H), 2.14 - 2.07 (m, 1H), 1.85 (d,  $J = 12$  Hz, 1H), 1.68 - 1.61 (m, 2H), 1.51 - 1.45 (t,  $J = 11.2$  Hz, 1H), 1.37 - 1.32 (m, 1H), 1.21 - 1.11 (m, 4H), 1.01 - 0.84 (m, 2H), 0.80 (d,  $J = 6.4$  Hz, 3H), 0.71 (d,  $J = 7.2$  Hz, 3H), 0.51 (d,  $J = 6.8$  Hz, 3H).  $^{13}\text{C NMR}$  (100 MHz,  $\text{CDCl}_3$ ):  $\delta$  163.9, 140.2 (d,  $J_{\text{C-P}} = 16.0$  Hz), 137.8 (d,  $J_{\text{C-P}} = 12.0$  Hz), 135.3 (d,  $J_{\text{C-P}} = 138.0$  Hz), 132.9, 131.5 (d,  $J_{\text{C-P}} = 11.0$  Hz), 131.4 (d,  $J_{\text{C-P}} = 3.0$  Hz), 128.1, 128.0, 126.8 (d,  $J_{\text{C-P}} = 11.0$  Hz), 123.8, 123.6, 107.5, 103.5 (d,  $J_{\text{C-P}} = 158.0$  Hz), 76.1 (d,  $J_{\text{C-P}} = 7.0$  Hz), 62.3, 48.8 (d,  $J_{\text{C-P}} = 5.0$  Hz), 43.2, 34.2, 31.5, 31.2, 25.0, 22.6, 22.0, 21.7, 21.0, 15.0, 14.0.  $^{31}\text{P NMR}$  (162 MHz,  $\text{CDCl}_3$ ):  $\delta$  27.48. **HRMS** Calcd for  $\text{C}_{29}\text{H}_{39}\text{NO}_4\text{P}$   $[\text{M} + \text{H}]^+$  496.2611, found 496.2615.

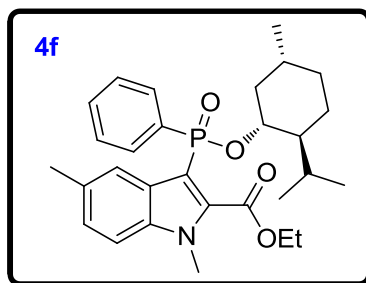

Prepared according to the general procedure. Flash column chromatography on a silica gel (ethyl acetate: petroleum ether, 1: 2) give the product (85% yield) as a yellow oil.  $R_f$  (ethyl acetate: petroleum ether, 1:2): 0.45.  $[\alpha]_D^{16} = +10.0$  (c 1.00,  $\text{CHCl}_3$ ).  $^1\text{H NMR}$  (400 MHz,  $\text{CDCl}_3$ ):  $\delta$  8.20 (s, 1H), 7.83 - 7.77 (m, 2H), 7.45 - 7.37 (m, 3H), 7.30 - 7.27 (m, 1H), 7.20 (d,  $J = 8.4$  Hz, 1H), 4.48 - 4.39 (m, 1H), 4.22 - 4.03 (m, 2H), 3.93 (s, 3H), 2.48 (s, 3H), 2.17 - 2.10 (m, 1H), 1.95 (d,  $J = 12.0$  Hz, 1H), 1.64 (d,  $J = 10.8$  Hz, 1H), 1.49 - 1.36 (m, 2H), 1.26 - 1.16 (m, 1H), 1.21 - 1.11 (m, 4H), 1.05 - 0.85 (m, 2H), 0.83 (d,  $J = 7.2$  Hz, 3H), 0.81 (d,  $J = 6.4$  Hz, 3H), 0.55 (d,  $J = 7.2$  Hz, 3H).  $^{13}\text{C NMR}$  (100 MHz,  $\text{CDCl}_3$ ):  $\delta$  161.5, 136.6, 136.6 (d,  $J_{\text{C-P}} = 12.0$  Hz), 136.0 (d,  $J_{\text{C-P}} = 144.0$  Hz), 134.1 (d,  $J_{\text{C-P}} = 21.0$  Hz), 131.5, 131.0 (d,  $J_{\text{C-P}} = 3.0$  Hz), 130.4 (d,  $J_{\text{C-P}} = 11.0$  Hz), 128.9 (d,  $J_{\text{C-P}} = 9.0$  Hz), 127.9, 127.7, 126.7, 123.1, 109.7, 107.4 (d,  $J_{\text{C-P}} = 159.0$  Hz), 76.2 (d,  $J_{\text{C-P}} = 6.0$  Hz), 61.3, 48.9 (d,  $J_{\text{C-P}} = 6.0$  Hz), 43.4, 34.0, 31.8, 31.4, 25.2, 22.6, 22.0, 21.6, 21.0, 15.2, 13.7.  $^{31}\text{P NMR}$

**4g**

CC1=CN2C(=C1)C(=C(C=C2)OC)C(=C3C=CC=CC=C3)C(=O)OCC3C(=O)OCC3C4=CC=CC=C4C5C(C)CCCC5

**4h**

CCOC(=O)C1=C(C2=CC=CC=C2P(=O)(OC3C(C(C)C)CCC3)OC4=CC=CC=C4)N(C)C5=CC=C(C=C5)F

S28



$J_{C-P}$  = 143.0 Hz), 134.8 (d,  $J_{C-P}$  = 11.0 Hz), 131.3 (d,  $J_{C-P}$  = 3.0 Hz), 130.6 (d,  $J_{C-P}$  = 11.0 Hz), 129.1, 128.9 (d,  $J_{C-P}$  = 8.0 Hz), 128.1, 127.9, 114.4 (d,  $J_{C-P}$  = 27.0 Hz), 111.1 (d,  $J_{C-P}$  = 10.0 Hz), 108.2 (d,  $J_{C-P}$  = 164.0 Hz), 108.5 (d,  $J_{C-P}$  = 26.0 Hz), 76.5 (d,  $J_{C-P}$  = 7.0 Hz), 61.7, 49.0 (d,  $J_{C-P}$  = 5.0 Hz), 43.4, 34.1, 32.2, 31.5, 25.3, 22.7, 22.0, 21.0, 15.3, 13.7.  **$^{31}\text{P}$  NMR (162 MHz,  $\text{CDCl}_3$ ):**  $\delta$  27.98.  **$^{19}\text{F}$  NMR (376 MHz,  $\text{CDCl}_3$ ):**  $\delta$  -120.53. **HRMS** Calcd for  $\text{C}_{28}\text{H}_{36}\text{FNO}_4\text{P}$   $[\text{M} + \text{H}]^+$  500.2360, found 500.2367.

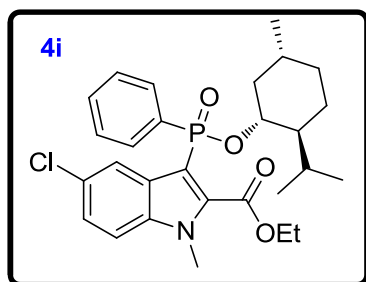

Prepared according to the general procedure. Flash column chromatography on a silica gel (ethyl acetate: petroleum ether, 1: 2) give the product (78% yield) as a yellow solid. Mp: 89-91 °C.  **$R_f$**  (ethyl acetate: petroleum ether, 1:2): 0.33.  **$[\alpha]_D^{16}$**  = +17.0 (*c* 1.00,  $\text{CHCl}_3$ ).  **$^1\text{H}$  NMR (400 MHz,  $\text{CDCl}_3$ ):**  $\delta$  8.39 (s, 1H), 7.82 - 7.76 (m, 2H), 7.48 - 7.40 (m, 1H), 7.40 - 7.37 (m, 2H), 7.34 (s, 2H), 4.49 - 4.39 (m, 1H), 4.24 - 4.07 (m, 2H), 3.96 (s, 3H), 2.14 - 2.07 (m, 1H), 1.85 (d,  $J$  = 12 Hz, 1H), 1.68 - 1.61 (m, 2H), 1.51 - 1.45 (t,  $J$  = 11.2 Hz, 1H), 1.37 - 1.32 (m, 1H), 1.21 - 1.11 (m, 4H), 1.05 - 0.85 (m, 2H), 0.83 (d,  $J$  = 7.2 Hz, 3H), 0.81 (d,  $J$  = 6.4 Hz, 3H), 0.55 (d,  $J$  = 7.2 Hz, 3H).  **$^{13}\text{C}$  NMR (100 MHz,  $\text{CDCl}_3$ ):**  $\delta$  161.2, 136.6, 136.5, 135.6 (d,  $J_{C-P}$  = 144.0 Hz), 135.4 (d,  $J_{C-P}$  = 21.0 Hz), 134.9, 131.3 (d,  $J_{C-P}$  = 2.0 Hz), 130.6 (d,  $J_{C-P}$  = 11.0 Hz), 129.4 (d,  $J_{C-P}$  = 8.0 Hz), 128.1 (d,  $J_{C-P}$  = 14.0 Hz), 128.0, 125.4, 123.2, 111.3, 108.1 (d,  $J_{C-P}$  = 159.0 Hz), 76.6 (d,  $J_{C-P}$  = 7.0 Hz), 61.7, 49.0 (d,  $J_{C-P}$  = 5.0 Hz), 43.4, 34.1, 33.2, 31.5, 25.4, 22.7, 22.0, 21.1, 15.4, 13.8.  **$^{31}\text{P}$  NMR (162 MHz,  $\text{CDCl}_3$ ):**  $\delta$  27.75. **HRMS** Calcd for  $\text{C}_{28}\text{H}_{36}\text{ClNO}_4\text{P}$   $[\text{M} + \text{H}]^+$  516.2065, found 516.2072.

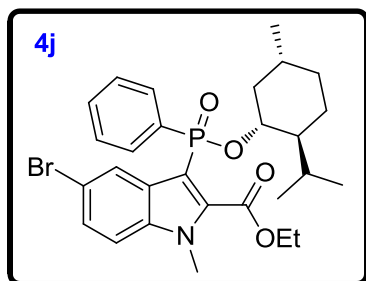

Prepared according to the general procedure. Flash column chromatography on a silica gel (ethyl acetate: petroleum ether, 1: 2) give the product (83% yield) as a white solid. Mp: 62-64 °C.  **$R_f$**  (ethyl acetate: petroleum ether, 1:2): 0.31.  **$[\alpha]_D^{16}$**  = +37.0 (*c* 1.00,  $\text{CHCl}_3$ ).  **$^1\text{H}$  NMR (400 MHz,  $\text{CDCl}_3$ ):**  $\delta$  8.57 (d,  $J$  = 1.6 Hz, 1H), 7.82 - 7.76 (m, 2H), 7.48 - 7.37 (m, 4H), 7.29 - 7.26 (m, 1H), 4.46 - 4.42 (m, 1H), 4.22 - 4.09 (m,

2H), 3.94 (s, 3H), 2.14 - 2.09 (m, 1H), 1.86 (d,  $J = 12.0$  Hz, 1H), 1.69 - 1.61 (m, 2H), 1.52 - 1.32 (m, 2H), 1.21 - 1.12 (m, 4H), 1.01 - 0.88 (m, 2H), 0.85 (d,  $J = 7.2$  Hz, 3H), 0.81 (d,  $J = 6.8$  Hz, 3H), 0.56 (d,  $J = 6.8$  Hz, 3H).  **$^{13}\text{C}$  NMR (100 MHz,  $\text{CDCl}_3$ ):**  $\delta$  161.1, 136.7 (d,  $J_{\text{C-P}} = 12.0$  Hz), 135.5 (d,  $J_{\text{C-P}} = 144.0$  Hz), 135.2 (d,  $J_{\text{C-P}} = 11.0$  Hz), 131.3 (d,  $J_{\text{C-P}} = 2.0$  Hz), 130.5 (d,  $J_{\text{C-P}} = 11.0$  Hz), 129.9 (d,  $J_{\text{C-P}} = 8.0$  Hz), 128.0, 127.9, 127.8, 126.2, 115.6, 108.0 (d,  $J_{\text{C-P}} = 158.0$  Hz), 76.5 (d,  $J_{\text{C-P}} = 6.0$  Hz), 61.7, 48.9 (d,  $J_{\text{C-P}} = 6.0$  Hz), 43.4, 34.0, 32.1, 31.5, 25.4, 22.7, 21.9, 21.0, 15.3, 13.7.  **$^{31}\text{P}$  NMR (162 MHz,  $\text{CDCl}_3$ ):**  $\delta$  27.75. **HRMS** Calcd for  $\text{C}_{28}\text{H}_{36}\text{BrNO}_4\text{P}$   $[\text{M} + \text{H}]^+$  560.1560, found 560.1567.

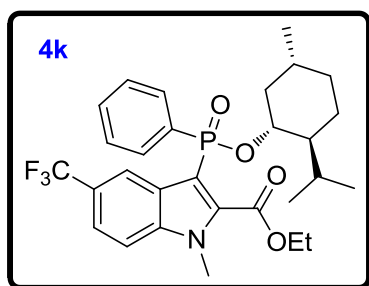

Prepared according to the general procedure. Flash column chromatography on a silica gel (ethyl acetate: petroleum ether, 1: 2) give the product (79% yield) as a yellow solid. Mp: 101-103 °C.  **$R_f$**  (ethyl acetate: petroleum ether, 1:2): 0.43.  **$[\alpha]_D^{16}$**  = +34.0 ( $c$  1.00,  $\text{CHCl}_3$ ).  **$^1\text{H}$  NMR (400 MHz,  $\text{CDCl}_3$ ):**  $\delta$  8.73 (s, 1H), 7.83 - 7.77 (m, 2H), 7.60 (d,  $J = 8.8$  Hz, 1H), 7.52 - 7.45 (m, 2H), 7.43 - 7.38 (m, 2H), 4.48 - 4.44 (m, 1H), 4.25 - 4.16 (m, 2H), 4.00 (s, 3H), 2.13-2.08 (m, 1H), 1.80 (d,  $J = 12.0$  Hz, 1H), 1.69 - 1.61 (m, 2H), 1.50 - 1.46 (m, 1H), 1.35 - 1.27 (m, 2H), 1.18 (t, (d,  $J = 7.2$  Hz, 4H), 1.01 - 0.85 (m, 2H), 0.81 (d,  $J = 7.2$  Hz, 3H), 0.80 (d,  $J = 6.4$  Hz, 3H), 0.58 (d,  $J = 6.8$  Hz, 3H).  **$^{13}\text{C}$  NMR (100 MHz,  $\text{CDCl}_3$ ):**  $\delta$  161.0, 139.2 (d,  $J_{\text{C-P}} = 11.0$  Hz), 136.2 (d,  $J_{\text{C-P}} = 20.0$  Hz), 135.2 (d,  $J_{\text{C-P}} = 144.0$  Hz), 131.4 (d,  $J_{\text{C-P}} = 3.0$  Hz), 130.5 (d,  $J_{\text{C-P}} = 11.0$  Hz), 128.1, 127.9, 127.5 (d,  $J_{\text{C-P}} = 8.0$  Hz), 124.8 (d,  $J_{\text{C-P}} = 270.0$  Hz), 124.4 (q,  $J_{\text{C-P}} = 32.0$  Hz), 121.7 (d,  $J_{\text{C-P}} = 5.0$  Hz), 121.3 (d,  $J_{\text{C-P}} = 3.0$  Hz), 110.8, 109.6 (d,  $J_{\text{C-P}} = 158.0$  Hz), 76.6 (d,  $J_{\text{C-P}} = 7.0$  Hz), 61.8, 48.9 (d,  $J_{\text{C-P}} = 5.0$  Hz), 43.3, 34.0, 32.2, 31.5, 25.3, 22.6, 21.9, 20.8, 15.3, 13.7.  **$^{31}\text{P}$  NMR (162 MHz,  $\text{CDCl}_3$ ):**  $\delta$  27.52.  **$^{19}\text{F}$  NMR (376 MHz,  $\text{CDCl}_3$ ):**  $\delta$  -60.76. **HRMS** Calcd for  $\text{C}_{29}\text{H}_{36}\text{F}_3\text{NO}_4\text{P}$   $[\text{M} + \text{H}]^+$  550.2329, found 550.2336..

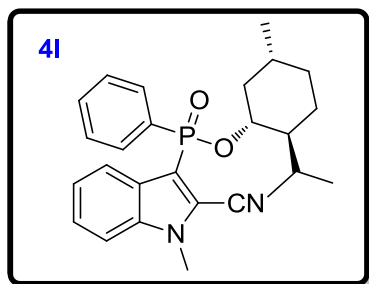

Prepared according to the general procedure. Flash column chromatography on a silica gel (ethyl acetate: petroleum ether, 1: 2) give the product (79% yield) as a white

solid. Mp: 119-121 °C. **R<sub>f</sub>** (ethyl acetate: petroleum ether, 1:2): 0.45. **[α]<sub>D</sub><sup>16</sup>** = +22.0 (c 1.00, CHCl<sub>3</sub>). **<sup>1</sup>H NMR (400 MHz, CDCl<sub>3</sub>)**: δ 8.03 (d, *J* = 8 Hz, 1H), 7.97 - 7.91 (m, 2H), 7.53 - 7.48 (m, 1H), 7.46 - 7.40 (m, 3H), 7.37 - 7.34 (m, 1H), 7.25 - 7.22 (m, 1H), 4.46 - 4.37 (m, 1H), 3.95 (s, 3H), 2.30 - 2.20 (m, 1H), 1.97 - 1.93 (m, 1H), 1.70 - 1.53 (m, 3H), 1.35 - 1.27 (m, 2H), 1.04 - 0.94 (m, 2H), 0.88 (d, *J* = 7.2 Hz, 3H), 0.82 (d, *J* = 5.6 Hz, 3H), 0.64 (d, *J* = 6.8 Hz, 3H). **<sup>13</sup>C NMR (100 MHz, CDCl<sub>3</sub>)**: δ 139.0 (d, *J*<sub>C-P</sub> = 1.0 Hz), 133.2 (d, *J*<sub>C-P</sub> = 142.0 Hz), 132.1, 132.0, 131.4 (d, *J*<sub>C-P</sub> = 10.0 Hz), 128.0 (d, *J*<sub>C-P</sub> = 13.0 Hz), 127.4 (d, *J*<sub>C-P</sub> = 10.0 Hz), 126.3, 122.9 (d, *J*<sub>C-P</sub> = 13.0 Hz), 115.5 (d, *J*<sub>C-P</sub> = 154.0 Hz), 114.6, 114.5, 112.2, 110.2, 77.7 (d, *J*<sub>C-P</sub> = 7.0 Hz), 48.5 (d, *J*<sub>C-P</sub> = 5.0 Hz), 43.2, 33.9, 31.9, 31.6, 25.5, 22.7, 21.9, 21.0, 15.4. **<sup>31</sup>P NMR (162 MHz, CDCl<sub>3</sub>)**: δ 21.75. **HRMS** Calcd for C<sub>26</sub>H<sub>32</sub>N<sub>2</sub>O<sub>2</sub>P [M + H]<sup>+</sup> 435.2196, found 435.2190.

Prepared according to the general procedure. Flash column chromatography on a silica gel (ethyl acetate: petroleum ether, 1: 2) give the product (52% yield) as a yellow oil. **R<sub>f</sub>** (ethyl acetate: petroleum ether, 1:2): 0.28. **[α]<sub>D</sub><sup>16</sup>** = +13.0 (*c* 1.00, CHCl<sub>3</sub>). **<sup>1</sup>H NMR (400 MHz, CDCl<sub>3</sub>):** δ 11.55 (br, 1H), 11.36 (br, 1H), 7.81 - 7.75 (m, 2H), 7.62 - 7.59 (m, 1H), 7.50 - 7.37 (m, 4H), 7.29 - 7.24 (m, 1H), 7.05 (t, *J* = 7.6 Hz, 1H), 4.29 - 4.24 (m, 1H), 3.15 (d, *J* = 4.0 Hz, 3H), 2.28 (s, 1H), 1.90 - 1.86 (m, 1H), 1.65 - 1.59 (m, 3H), 1.50 - 1.40 (m, 2H), 0.91 (d, *J* = 5.6 Hz, 3H), 0.68 (d, *J* = 6.8 Hz, 3H), 0.24 (d, *J* = 6.8 Hz, 3H). **<sup>13</sup>C NMR (100 MHz, CDCl<sub>3</sub>):** δ 161.2, 137.6 (d, *J*<sub>C-P</sub> = 21.0 Hz), 135.1 (d, *J*<sub>C-P</sub> = 10.0 Hz), 133.9 (d, *J*<sub>C-P</sub> = 148.0 Hz), 131.9 (d, *J*<sub>C-P</sub> = 3.0 Hz), 130.6, 130.5, 129.4, 129.2, 128.5, 128.4, 124.4, 122.1, 121.6, 112.5, 101.6 (d, *J*<sub>C-P</sub> = 153.0 Hz), 78.3 (d, *J*<sub>C-P</sub> = 8.0 Hz), 48.7 (d, *J*<sub>C-P</sub> = 6.0 Hz), 43.8, 33.9, 31.6, 29.7, 26.8, 25.3, 22.6, 22.0, 20.9, 14.9. **<sup>31</sup>P NMR (162 MHz, CDCl<sub>3</sub>):** δ 31.16. **HRMS** Calcd for C<sub>27</sub>H<sub>36</sub>N<sub>2</sub>O<sub>3</sub>P [M + H]<sup>+</sup> 453.2302, found 453.2297.

Prepared according to the general procedure. Flash column chromatography on a silica gel (ethyl acetate: petroleum ether, 1: 2) give the product (73% yield) as a

yellow oil.  $R_f$  (ethyl acetate: petroleum ether, 1:1): 0.25.  $[\alpha]_D^{16} = -61.0$  ( $c$  1.00,  $\text{CHCl}_3$ ).  $^1\text{H NMR}$  (400 MHz,  $\text{CDCl}_3$ ):  $\delta$  14.32 (br, 1H), 11.23 (br, 1H), 7.80 (dd,  $J = 13.6$  Hz, 7.2 Hz, 2H), 7.62 (d,  $J = 8.4$  Hz, 1H), 7.52 - 7.47 (m, 1H), 7.44 - 7.37 (m, 3H), 7.30 - 7.25 (m, 1H), 7.05 (t,  $J = 7.6$  Hz, 1H), 4.30 - 4.21 (m, 1H), 3.98 (s, 3H), 2.35-2.31 (m, 1H), 1.88 - 1.80 (m, 1H), 1.65 - 1.59 (m, 2H), 1.50 - 1.41 (m, 3H), 0.92 - 0.86 (m, 5H), 0.68 (d,  $J = 6.8$  Hz, 3H), 0.19 (d,  $J = 6.8$  Hz, 3H).  $^{13}\text{C NMR}$  (100 MHz,  $\text{CDCl}_3$ ):  $\delta$  158.3, 135.5 (d,  $J_{\text{C-P}} = 12.0$  Hz), 135.1, 134.9, 133.2 (d,  $J_{\text{C-P}} = 150.0$  Hz), 132.2 (d,  $J_{\text{C-P}} = 2.0$  Hz), 130.7 (d,  $J_{\text{C-P}} = 11.0$  Hz), 129.0 (d,  $J_{\text{C-P}} = 10.0$  Hz), 128.5 (d,  $J_{\text{C-P}} = 13.0$  Hz), 124.8, 121.9 (d,  $J_{\text{C-P}} = 10.0$  Hz), 112.6, 101.7 (d,  $J_{\text{C-P}} = 151.0$  Hz), 78.7 (d,  $J_{\text{C-P}} = 6.0$  Hz), 64.1 (d,  $J_{\text{C-P}} = 5.0$  Hz), 48.7 (d,  $J_{\text{C-P}} = 7.0$  Hz), 43.8, 33.9, 31.7, 25.2, 22.6, 22.0, 20.9, 14.8.  $^{31}\text{P NMR}$  (162 MHz,  $\text{CDCl}_3$ ):  $\delta$  30.67. HRMS Calcd for  $\text{C}_{27}\text{H}_{36}\text{N}_2\text{O}_3\text{P}$   $[\text{M} + \text{H}]^+$  453.2302, found 453.2297.

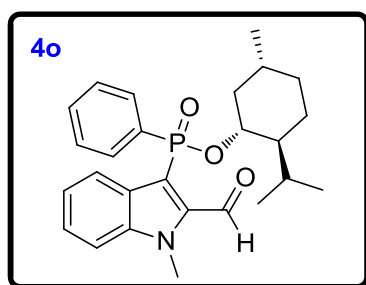

Prepared according to the general procedure. Flash column chromatography on a silica gel (ethyl acetate: petroleum ether, 1: 2) give the product (82% yield) as a yellow solid. Mp: 173-175 oC.  $R_f$  (ethyl acetate: petroleum ether, 1:2): 0.59.  $[\alpha]_D^{16} = -58.0$  ( $c$  1.00,  $\text{CHCl}_3$ ).  $^1\text{H NMR}$  (400 MHz,  $\text{CDCl}_3$ ):  $\delta$  10.86 (s, 1H), 7.68 (d,  $J = 8.4$  Hz, 1H), 7.88 - 7.82 (m, 2H), 7.49 - 7.38 (m, 5H), 7.24 - 7.20 (m, 1H), 4.47 - 4.37 (m, 1H), 4.14 (s, 3H), 2.10 - 1.97 (m, 2H), 1.64 (d,  $J = 10.8$  Hz, 2H), 1.53 - 1.47 (m, 1H), 1.36 - 1.25 (m, 2H), 1.02 - 0.92 (m, 2H), 0.90 (d,  $J = 6.4$  Hz, 3H), 0.85 (d,  $J = 6.0$  Hz, 3H), 0.76 (d,  $J = 7.2$  Hz, 3H).  $^{13}\text{C NMR}$  (100 MHz,  $\text{CDCl}_3$ ):  $\delta$  186.6 (d,  $J_{\text{C-P}} = 18.0$  Hz), 139.4 (d,  $J_{\text{C-P}} = 12.0$  Hz), 138.2 (d,  $J_{\text{C-P}} = 22.0$  Hz), 134.9 (d,  $J_{\text{C-P}} = 142.0$  Hz), 131.9, 130.7 (d,  $J_{\text{C-P}} = 11.0$  Hz), 128.4 (d,  $J_{\text{C-P}} = 13.0$  Hz), 127.6 (d,  $J_{\text{C-P}} = 9.0$  Hz), 126.9, 123.6, 122.4, 115.6 (d,  $J_{\text{C-P}} = 153.0$  Hz), 110.6, 77.5, 49.0 (d,  $J_{\text{C-P}} = 5.0$  Hz), 43.6, 34.0, 32.5, 31.6, 25.5, 22.7, 22.0, 21.0, 15.2.  $^{31}\text{P NMR}$  (162 MHz,  $\text{CDCl}_3$ ):  $\delta$  25.95. HRMS Calcd for  $\text{C}_{26}\text{H}_{33}\text{NO}_3\text{P}$   $[\text{M} + \text{H}]^+$  438.2193, found 438.2199.

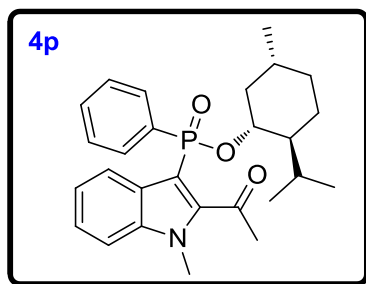

Prepared according to the general procedure. Flash column chromatography on a silica gel (ethyl acetate: petroleum ether, 1: 2) give the product (82% yield) as a yellow oil.  $R_f$  (ethyl acetate: petroleum ether, 1:2): 0.55.  $[\alpha]_{D16} = +20.0$  (c 1.00,  $\text{CHCl}_3$ ).  $^1\text{H}$  NMR (400 MHz,  $\text{CDCl}_3$ ):  $\delta$  7.89 - 7.83 (m, 2H), 7.80 (d,  $J = 8$  Hz, 1H), 7.49 - 7.44 (m, 1H), 7.43 - 7.29 (m, 4H), 7.20 - 7.15 (m, 1H), 4.34 - 4.24 (m, 1H), 3.74 (s, 3H), 2.80 (s, 3H), 2.05 - 1.97 (m, 2H), 1.61 (d,  $J = 10$  Hz, 2H), 1.45 - 1.39 (m, 1H), 1.35 - 1.20 (m, 2H), 0.99 - 0.82 (m, 2H), 0.80 (d,  $J = 2.8$  Hz, 3H), 0.74 (d,  $J = 7.2$  Hz, 3H), 0.45 (d,  $J = 6.8$  Hz, 3H).  $^{13}\text{C}$  NMR (100 MHz,  $\text{CDCl}_3$ ):  $\delta$  198.4, 144.5 (d,  $J_{\text{C-P}} = 22.0$  Hz), 137.5 (d,  $J_{\text{C-P}} = 11.0$  Hz), 134.6 (d,  $J_{\text{C-P}} = 141.0$  Hz), 131.6 (d,  $J_{\text{C-P}} = 3.0$  Hz), 131.0 (d,  $J_{\text{C-P}} = 11.0$  Hz), 128.2 (d,  $J_{\text{C-P}} = 13.0$  Hz), 127.5 (d,  $J_{\text{C-P}} = 10.0$  Hz), 124.1, 122.4, 121.9, 110.2, 104.3 (d,  $J_{\text{C-P}} = 159.0$  Hz), 77.0, 49.0 (d,  $J_{\text{C-P}} = 6.0$  Hz), 43.4, 34.0, 33.4, 31.5, 31.3, 25.5, 22.7, 22.0, 21.0, 15.1.  $^{31}\text{P}$  NMR (162 MHz,  $\text{CDCl}_3$ ):  $\delta$  26.08. HRMS Calcd for  $\text{C}_{27}\text{H}_{35}\text{NO}_3\text{P}$   $[\text{M} + \text{H}]^+$  452.2349, found 452.2354.

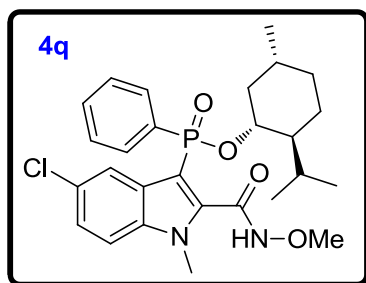

Prepared according to the general procedure. Flash column chromatography on a silica gel (ethyl acetate: petroleum ether, 1: 2) give the product (68% yield) as a yellow oil.  $R_f$  (ethyl acetate: petroleum ether, 1:1): 0.27.  $[\alpha]_{D16} = -42.0$  (c 1.00,  $\text{CHCl}_3$ ).  $^1\text{H}$  NMR (400 MHz,  $\text{CDCl}_3$ ):  $\delta$  14.24 (br, 1H), 11.15 (br, 1H), 7.81 - 7.74 (m, 2H), 7.56 - 7.51 (m, 2H), 7.48 - 7.41 (m, 3H), 7.25 - 7.24 (m, 1H), 4.31 - 4.22 (m, 1H), 3.97 (s, 3H), 2.30 - 2.26 (m, 1H), 1.92 - 1.83 (m, 1H), 1.66 - 1.62 (m, 2H), 1.54 - 1.51 (m, 1H), 1.49 - 1.37 (m, 2H), 0.98-0.85 (m, 5H), 0.75 (d,  $J = 6.8$  Hz, 3H), 0.28 (d,  $J = 6.8$  Hz, 3H).  $^{13}\text{C}$  NMR (100 MHz,  $\text{CDCl}_3$ ):  $\delta$  157.9, 136.0 (d,  $J_{\text{C-P}} = 20.0$  Hz), 133.8 (d,  $J_{\text{C-P}} = 12.0$  Hz), 132.9 (d,  $J_{\text{C-P}} = 150.0$  Hz), 132.5 (d,  $J_{\text{C-P}} = 3.0$  Hz), 130.6 (d,  $J_{\text{C-P}} = 12.0$  Hz), 129.9 (d,  $J_{\text{C-P}} = 11.0$  Hz), 128.7 (d,  $J_{\text{C-P}} = 13.0$  Hz), 127.8, 125.5, 121.3, 113.8, 102.0 (d,  $J_{\text{C-P}} = 152.0$  Hz), 79.2 (d,  $J_{\text{C-P}} = 7.0$  Hz), 64.2, 48.7 (d,  $J_{\text{C-P}} = 7.0$  Hz), 43.7, 33.9, 31.7, 25.5, 22.7, 22.0, 20.9, 14.9.  $^{31}\text{P}$  NMR (162 MHz,  $\text{CDCl}_3$ ):  $\delta$  29.95. HRMS Calcd for  $\text{C}_{27}\text{H}_{35}\text{ClN}_2\text{O}_4\text{P}$   $[\text{M} + \text{H}]^+$  503.1861, found 503.1855.

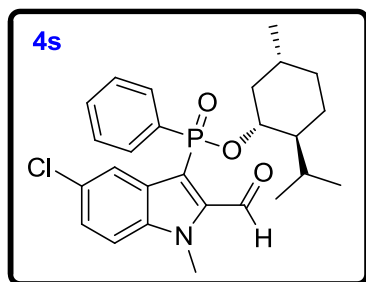

Prepared according to the general procedure. Flash column chromatography on a silica gel (ethyl acetate: petroleum ether, 1: 2) give the product (76% yield) as a yellow solid. Mp: 177-179 °C.  $R_f$  (ethyl acetate: petroleum ether, 1:2): 0.51.  $[\alpha]_D^{16} = +17.0$  ( $c$  1.00,  $\text{CHCl}_3$ ).  $^1\text{H NMR}$  (400 MHz,  $\text{CDCl}_3$ ):  $\delta$  10.78 (s, 1H), 8.03 (d,  $J = 1.2$  Hz, 1H), 7.88 - 7.80 (m, 2H), 7.52 - 7.47 (m, 1H), 7.45 - 7.34 (m, 4H), 4.50 - 4.41 (m, 1H), 4.11 (s, 3H), 2.10 - 2.00 (m, 2H), 1.70 - 1.65 (m, 2H), 1.57 - 1.50 (m, 1H), 1.42 - 1.23 (m, 2H), 1.05 - 0.87 (m, 2H), 0.86 - 0.80 (m, 6H), 0.85 (d,  $J = 6.0$  Hz, 3H), 0.76 (d,  $J = 7.2$  Hz, 3H).  $^{13}\text{C NMR}$  (100 MHz,  $\text{CDCl}_3$ ):  $\delta$  186.2, 138.7 (d,  $J_{\text{C-P}} = 21.0$  Hz), 137.8 (d,  $J_{\text{C-P}} = 12.0$  Hz), 134.6 (d,  $J_{\text{C-P}} = 142.0$  Hz), 132.1 (d,  $J_{\text{C-P}} = 2.0$  Hz), 130.7 (d,  $J_{\text{C-P}} = 11.0$  Hz), 128.7, 128.5, 128.4, 127.5, 122.8, 115.2 (d,  $J_{\text{C-P}} = 153.0$  Hz), 111.9, 78.0 (d,  $J_{\text{C-P}} = 7.0$  Hz), 49.0 (d,  $J_{\text{C-P}} = 6.0$  Hz), 43.6, 34.0, 32.8, 31.6, 25.7, 22.8, 21.9, 21.0, 15.3.  $^{31}\text{P NMR}$  (162 MHz,  $\text{CDCl}_3$ ):  $\delta$  25.44. HRMS Calcd for  $\text{C}_{26}\text{H}_{32}\text{ClNO}_3\text{P}$   $[\text{M} + \text{H}]^+$  472.1803, found 472.1796.

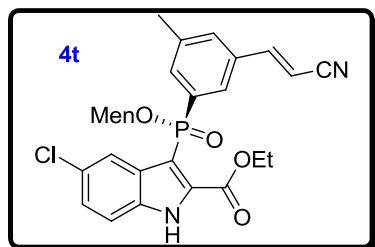

Prepared according to the general procedure. Flash column chromatography on a silica gel (ethyl acetate: petroleum ether, 1: 2) give the product (56% yield) as a yellow oil.  $R_f$  (ethyl acetate: petroleum ether, 1:2): 0.20.  $[\alpha]_D^{16} = +25.0$  ( $c$  1.00,  $\text{CHCl}_3$ ).  $^1\text{H NMR}$  (400 MHz,  $\text{CDCl}_3$ ):  $\delta$  9.78, (s, 1H), 8.58 (d,  $J = 1.6$  Hz, 1H), 7.72 (d,  $J = 13.6$  Hz, 1H), 7.63 (d,  $J = 13.6$  Hz, 1H), 7.45 - 7.34 (m, 4H), 5.91 (d,  $J = 16.8$  Hz, 1H), 4.52 - 4.42 (m, 1H), 4.21 - 4.11 (m, 2H), 2.37 (s, 3H), 2.37 (s, 3H), 2.14 - 2.07 (m, 1H), 1.85 (d,  $J = 11.6$  Hz, 1H), 1.70 - 1.52 (m, 3H), 1.41 - 1.17 (m, 2H), 1.14 (t,  $J = 11.6$  Hz, 3H), 1.05 - 0.81 (m, 8H), 0.53 (d,  $J = 6.8$  Hz, 3H).  $^{13}\text{C NMR}$  (100 MHz,  $\text{CDCl}_3$ ):  $\delta$  159.9, 149.7, 138.8 (d,  $J_{\text{C-P}} = 14.0$  Hz), 135.9, 134.5, 134.2 (d,  $J_{\text{C-P}} = 11.0$  Hz), 133.3, 133.1 (d,  $J_{\text{C-P}} = 10.0$  Hz), 132.9, 130.7 (d,  $J_{\text{C-P}} = 7.0$  Hz), 129.7, 128.4, 127.5 (d,  $J_{\text{C-P}} = 11.0$  Hz), 126.4, 123.5, 117.8, 113.3, 97.3, 77.6 (d,  $J_{\text{C-P}} = 6.0$  Hz), 61.9, 49.1 (d,  $J_{\text{C-P}} = 7.0$  Hz), 43.7, 33.9, 31.9, 31.5, 25.6, 22.7, 21.9, 21.2, 21.1, 15.1, 13.8.  $^{31}\text{P NMR}$  (162 MHz,  $\text{CDCl}_3$ ):  $\delta$  27.02. HRMS Calcd for  $\text{C}_{27}\text{H}_{35}\text{NO}_3\text{P}$   $[\text{M} + \text{H}]^+$  567.2174, found 567.2179.

## 5. Charts of products.

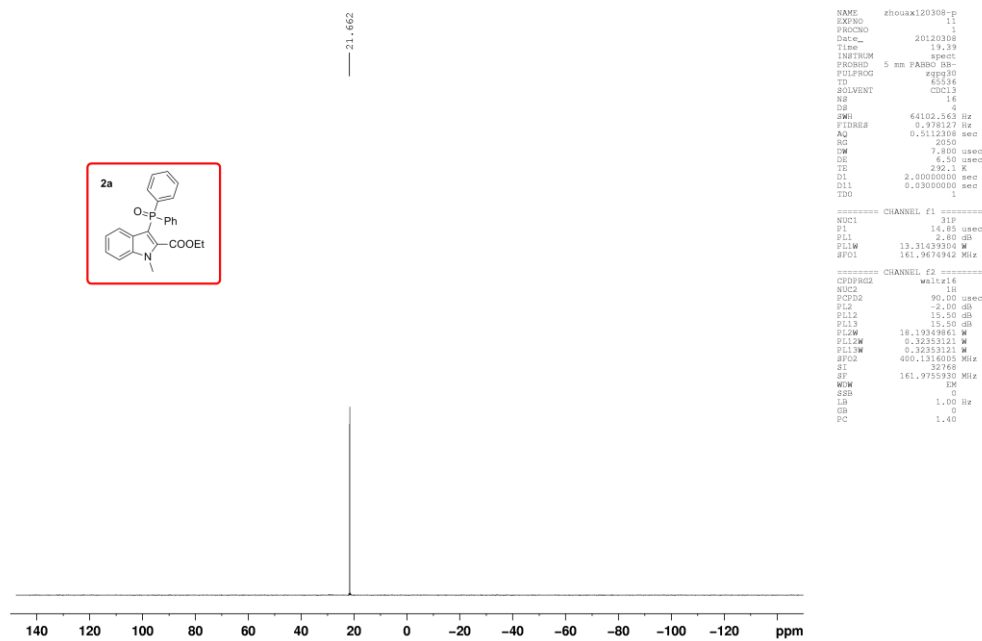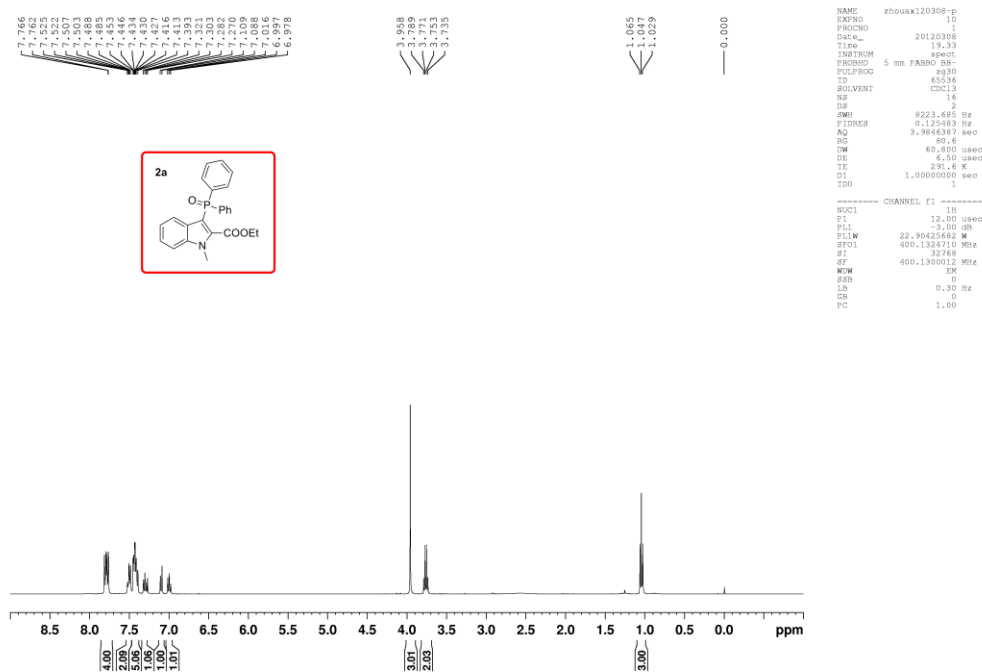





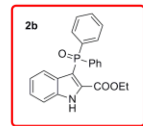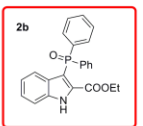

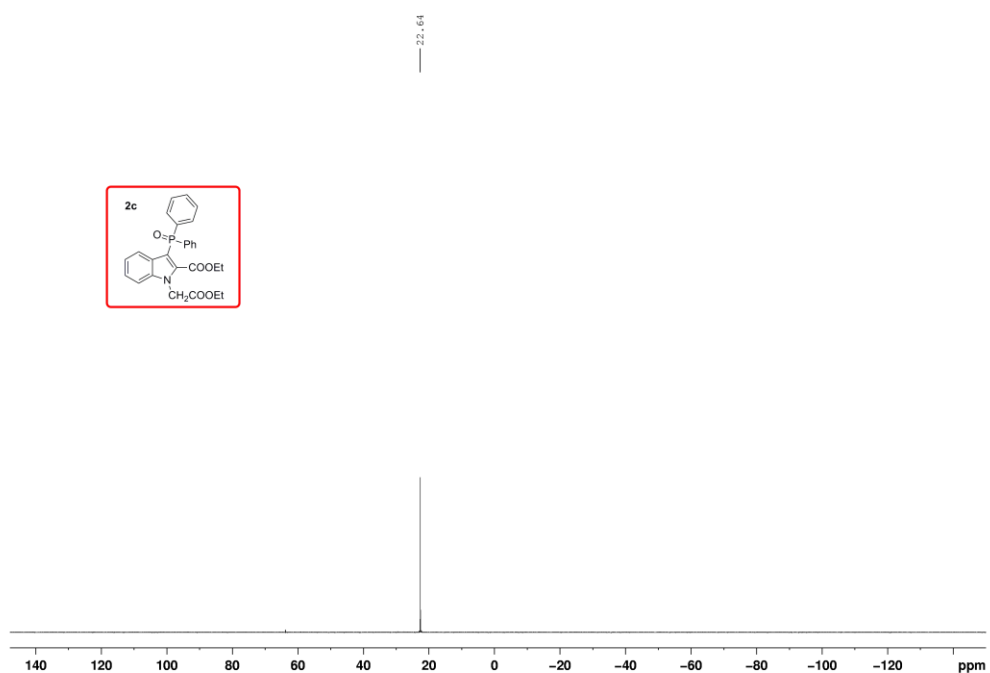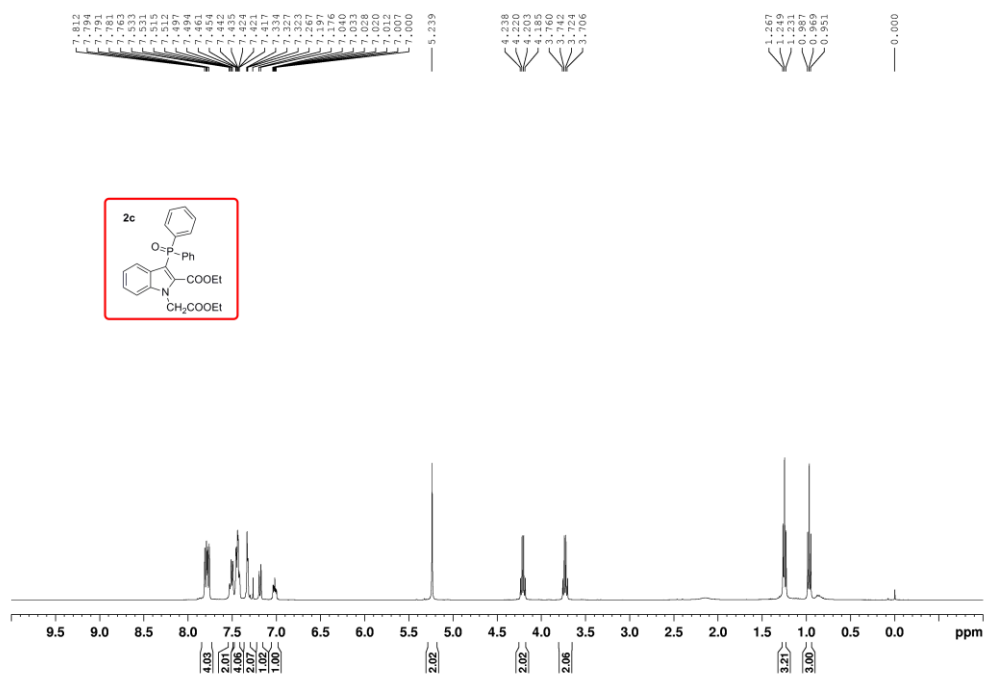

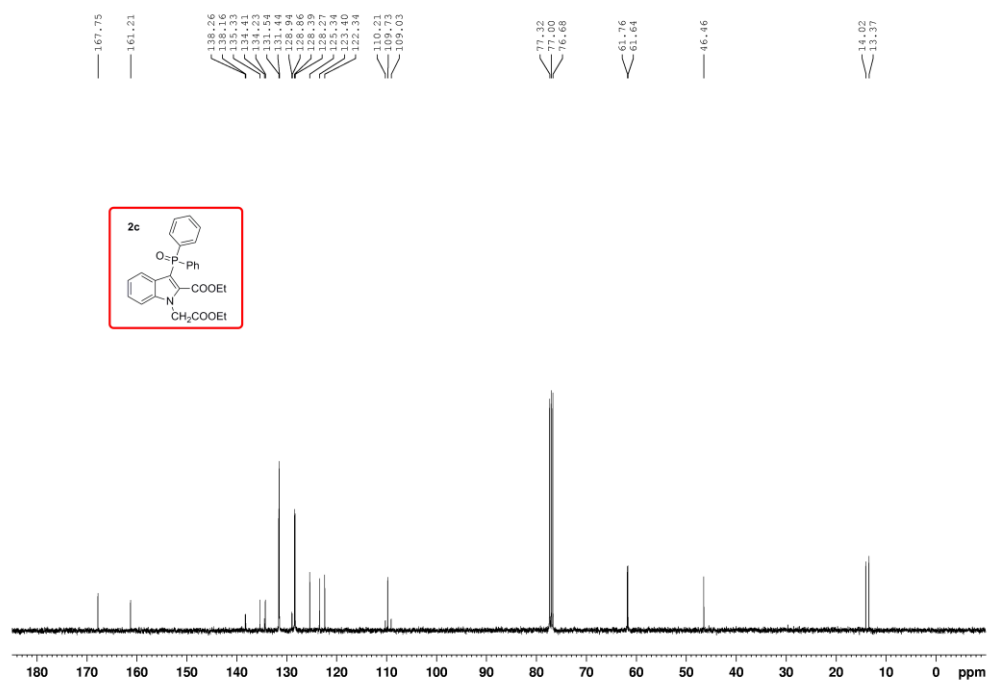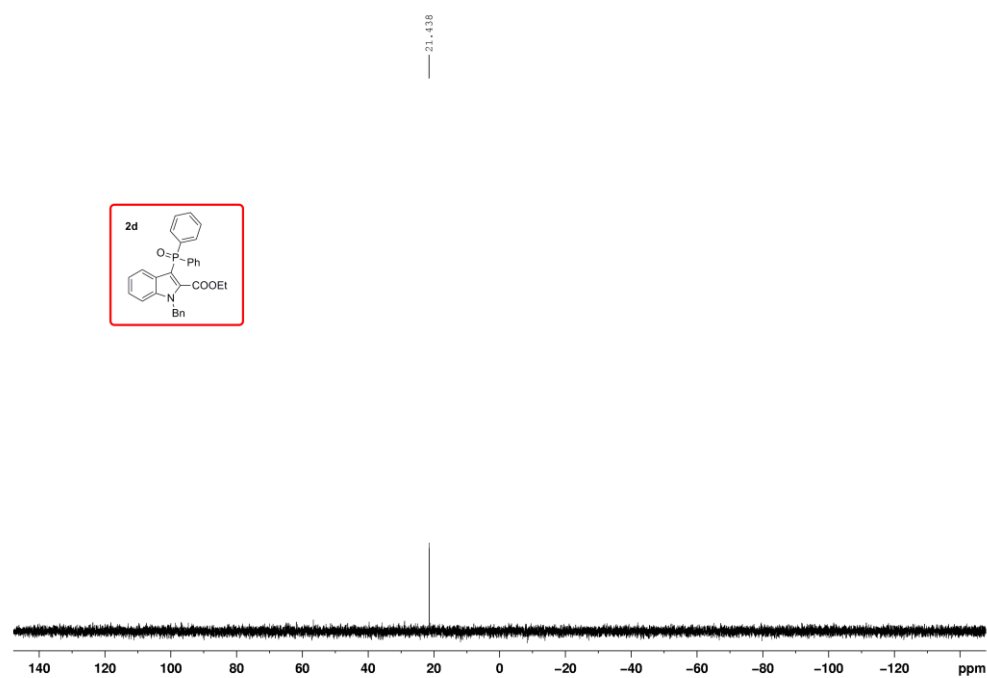

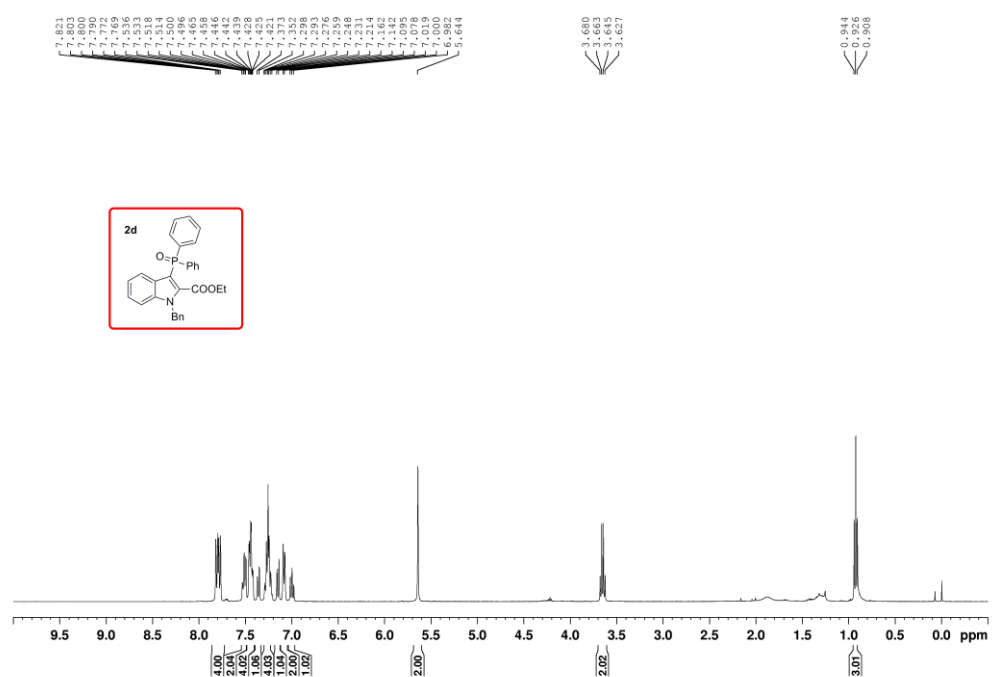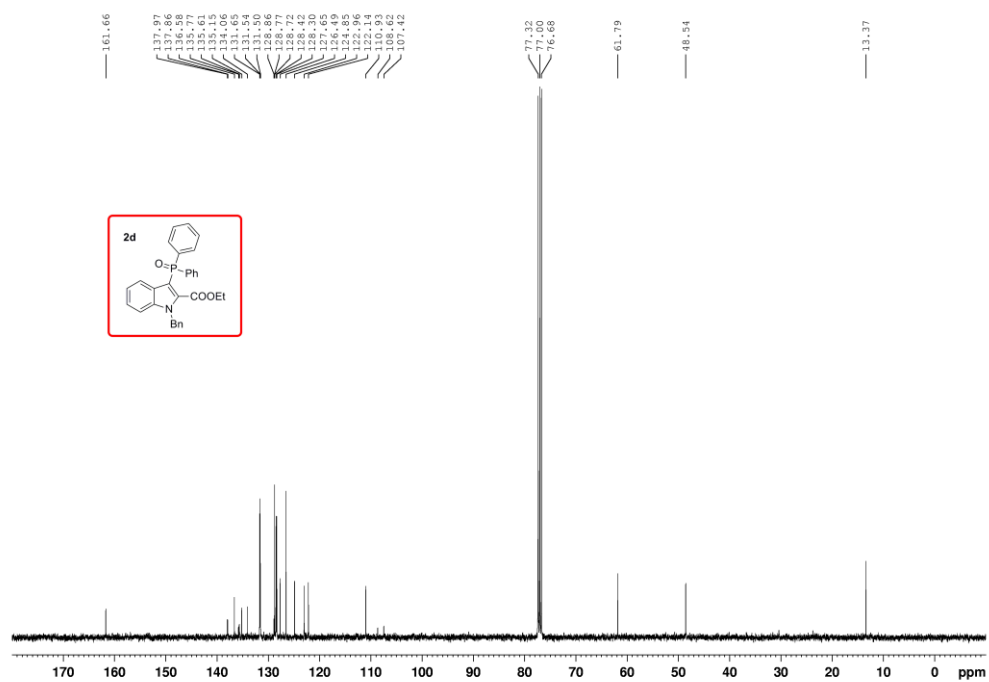



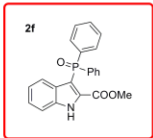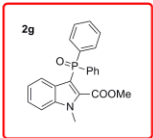

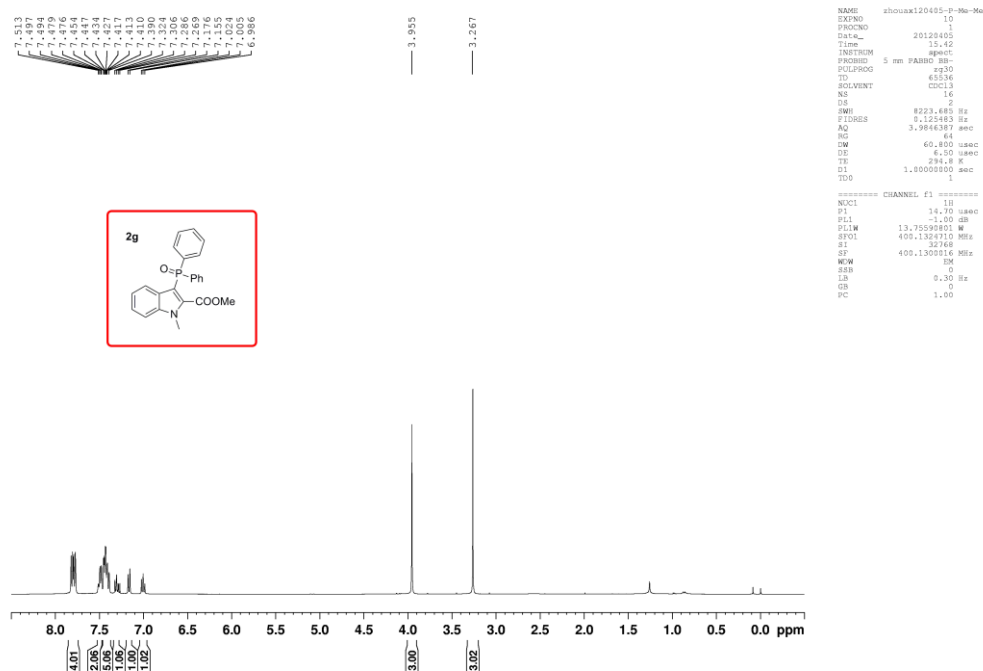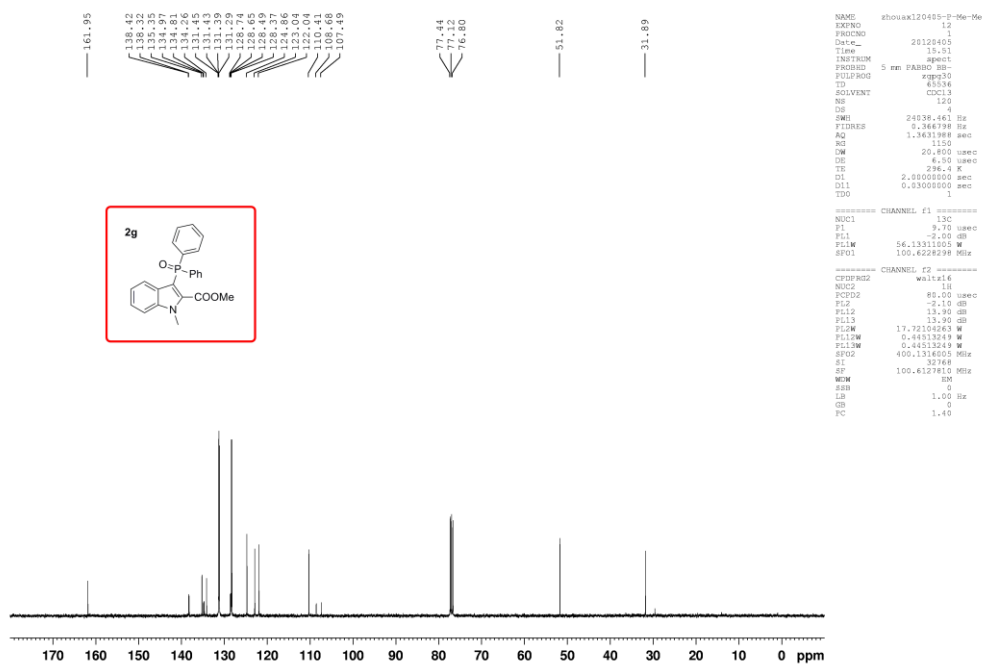

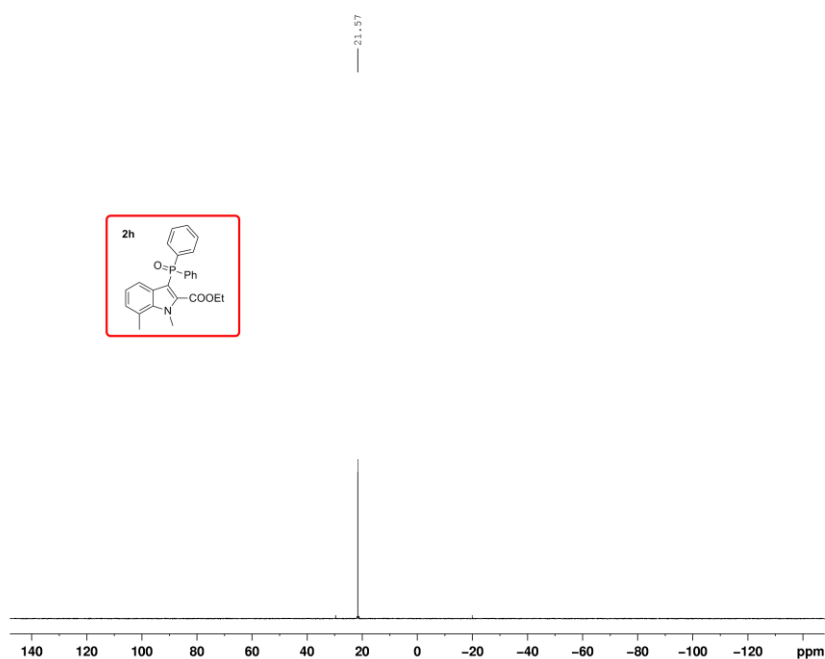

```

NAME      zhousx120823-7-Me
EXPNO     1
PROCNO    1
Date_     20120823
Time      22.45
INSTRUM   spect
PROBHD    5 mm F400
PULPROG   zgpg30
TD         65536
SOLVENT   CDCl3
NS         32
DS         4
SWH        64102.563 Hz
FIDRES     0.378127 Hz
AQ         0.5112308 sec
RG         2550
DW         7.800 usec
DE         4.50 usec
TE         300.0 K
D1         2.00000000 sec
D11        0.03000000 sec
TDO        1

===== CHANNEL f1 =====
NUC1       131P
P1         10.80 usec
PL1        0.00 dB
PL1W       26.12361908 W
SFO1       161.9674942 MHz

===== CHANNEL f2 =====
CPDPRG2    waltz16
NUC2       1H
PCPD2      80.00 usec
PL2        -2.10 dB
PL12       13.90 dB
PL13       13.90 dB
PL1W       17.72104263 W
PL12W      0.44813249 W
PL13W      0.44813249 W
SFO2       400.1314005 MHz
SI         32768
SF         161.9755930 MHz
WDW        EM
GB         0
LB         1.00 Hz
GB         0
PC         1.40
  
```

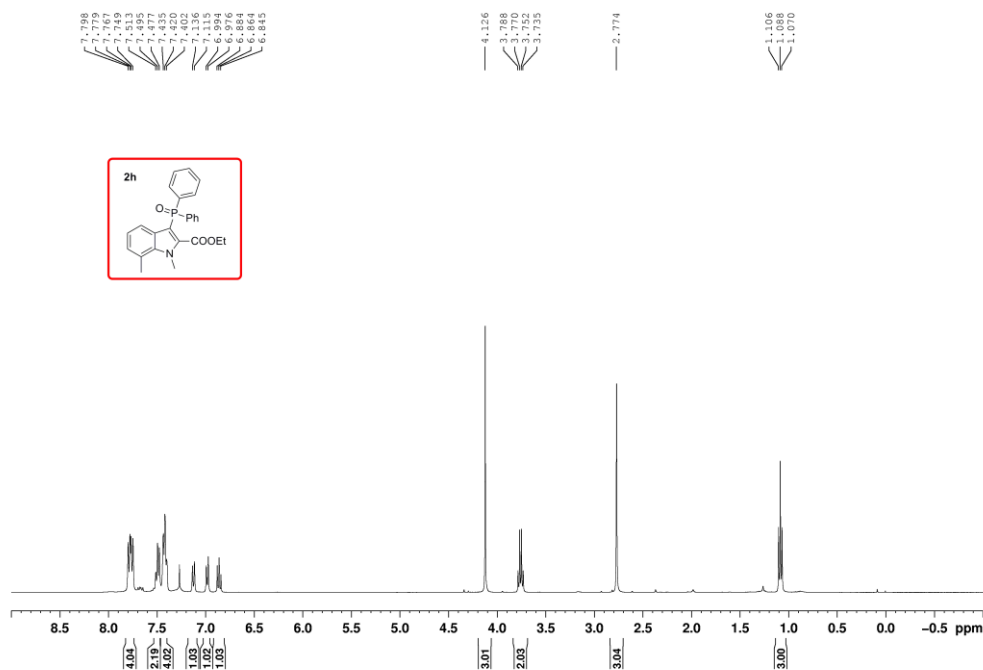



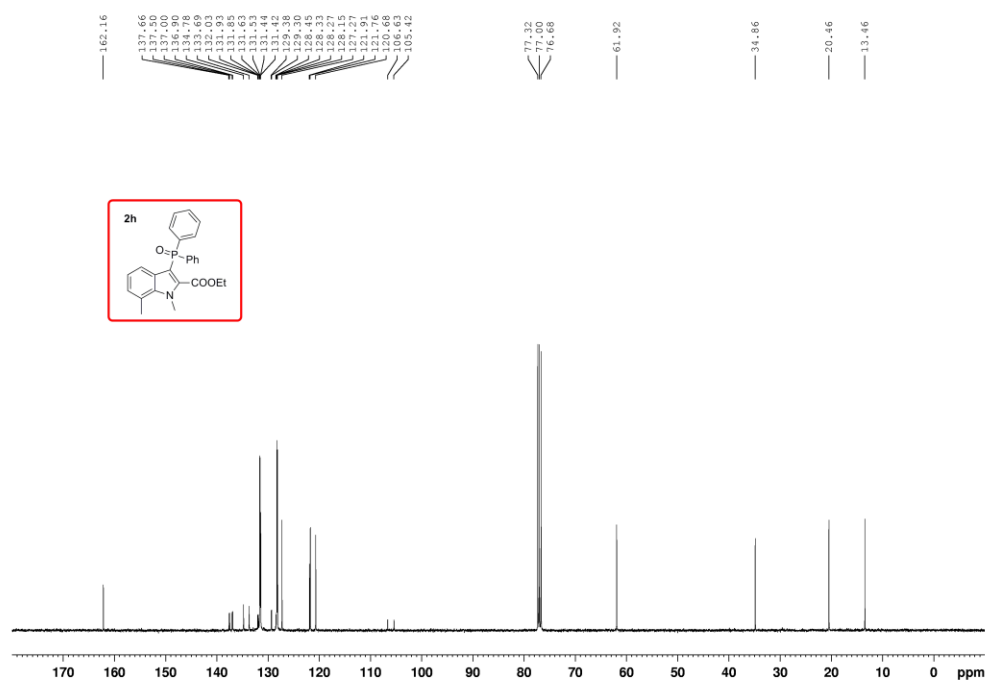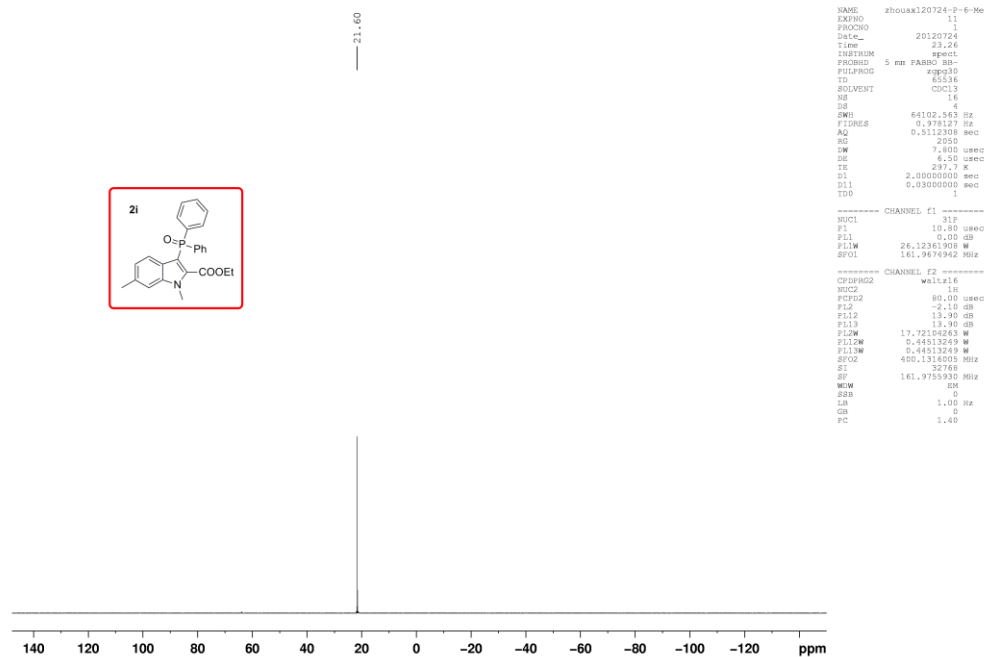

```

NAME      zhouxi20724-p-6-Me
EXPNO     1
PROCNO    1
Date_     20120724
Time      23.26
INSTRUM    spect
PROBHD     5 mm F4BBO BB-
PULPROG    zgpg30
TD         65536
SOLVENT    CDCl3
NS         16
DS         4
SWH         64102.563 Hz
FIDRES     0.978127 Hz
AQ         0.5112308 sec
RG         2050
DSW         7.605 usec
DE         6.50 usec
TE         297.7 K
D1         2.00000000 sec
D11        0.03000000 sec
TD0        1

===== CHANNEL F1 =====
NUC1       31P
P1         10.80 usec
PL1        0.00 dB
PL1W       26.12361908 W
SFO1       161.9674962 MHz

===== CHANNEL F2 =====
CPDPRG2    waltz16
NUC2       13C
PCPD2      80.00 usec
PL2        -2.10 dB
PL12       13.90 dB
PL13       13.90 dB
PL1W       17.72104263 W
PL12W      0.44513249 W
PL13W      0.44513249 W
SFO2       400.1314505 MHz
SI         32768
SF         161.9755930 MHz
WDW         DM
SSB         0
LB         1.00 Hz
GB         0
PC         1.40

```

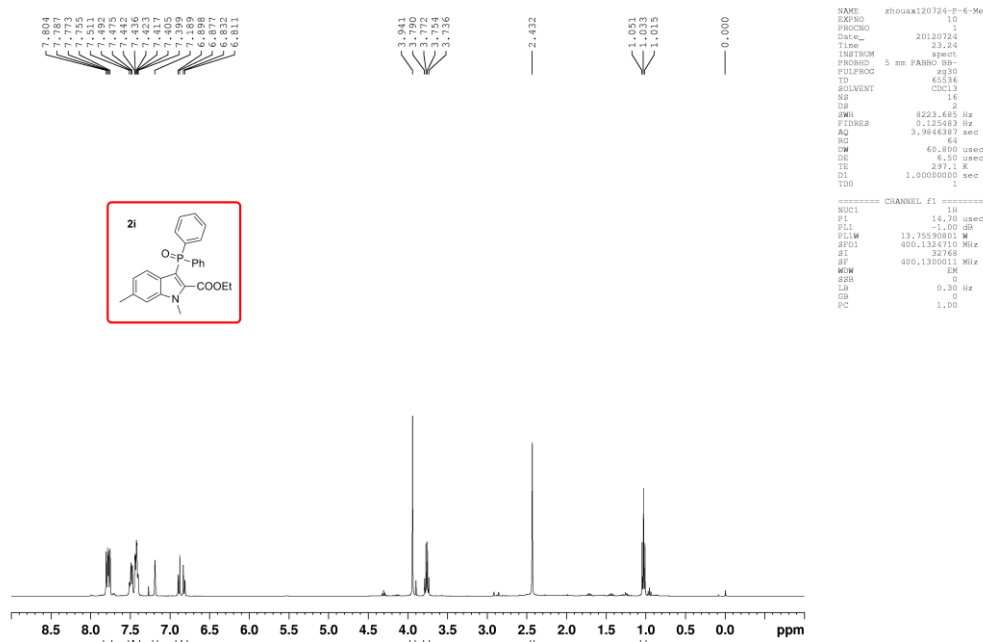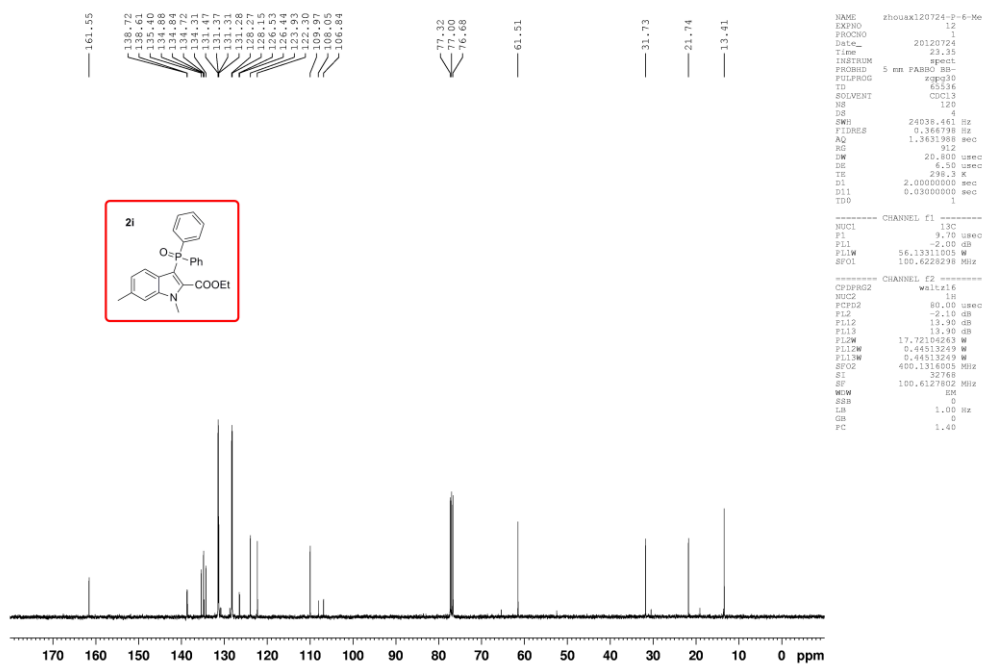

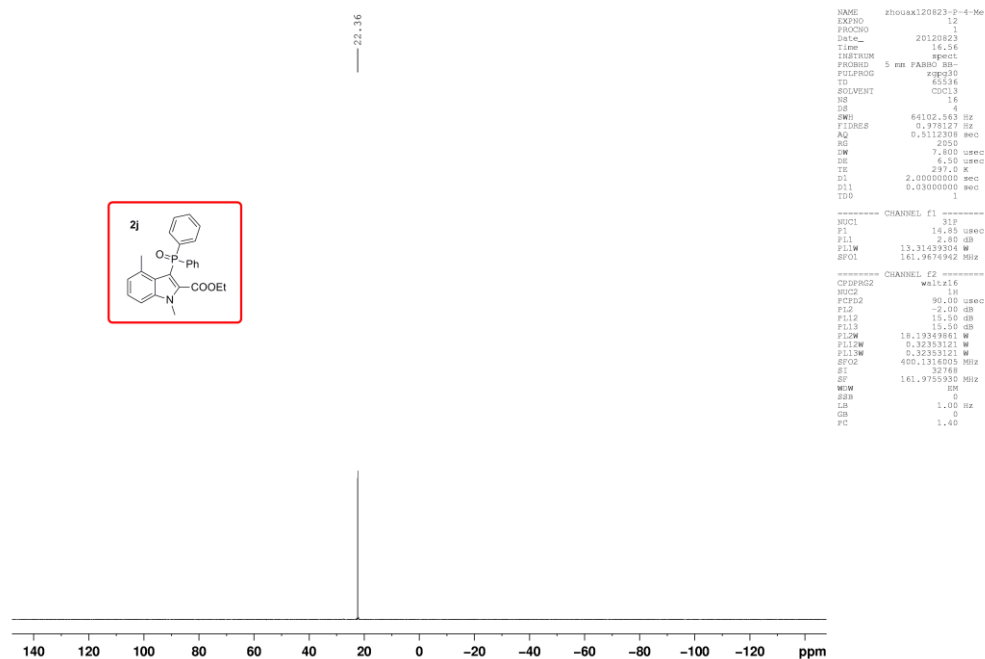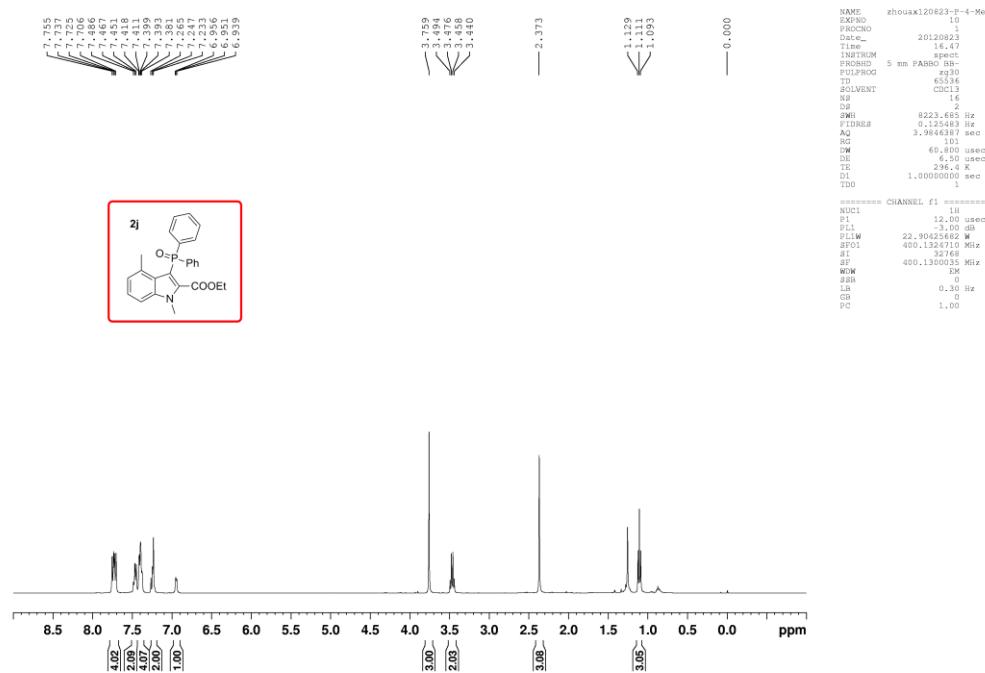

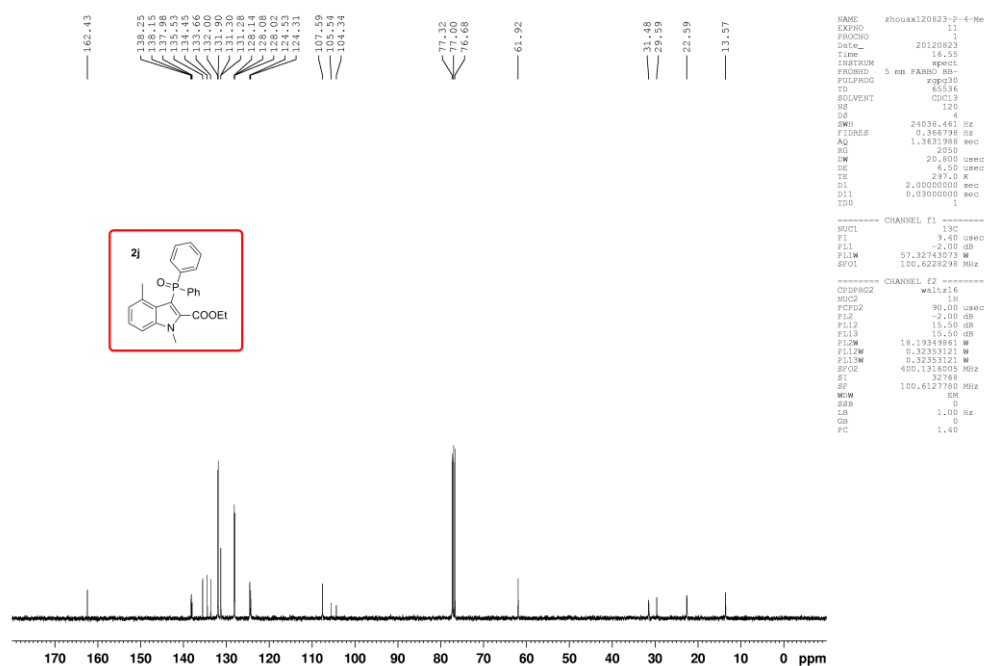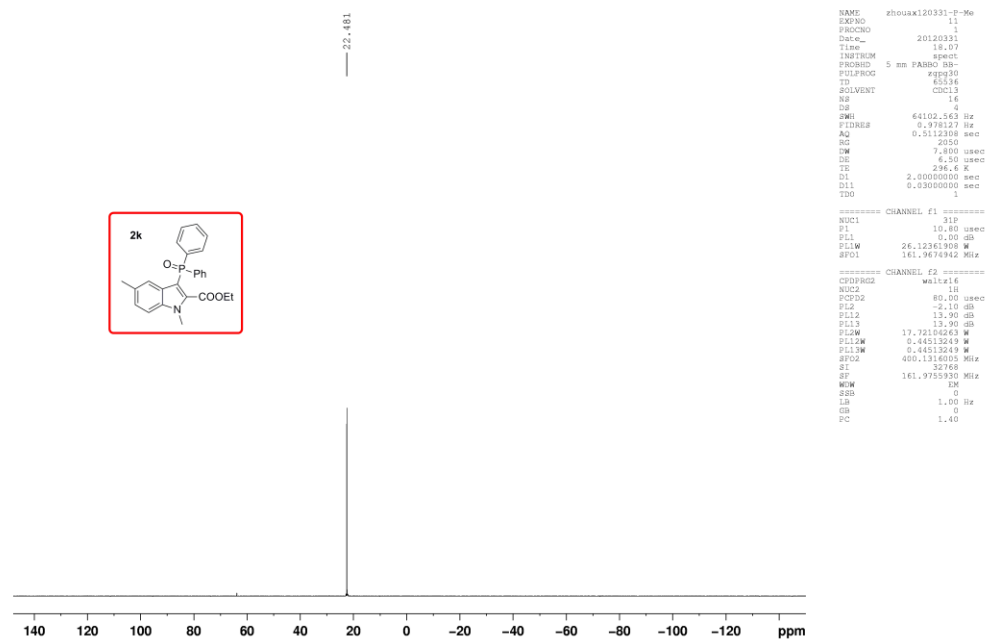

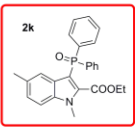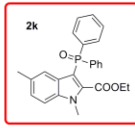

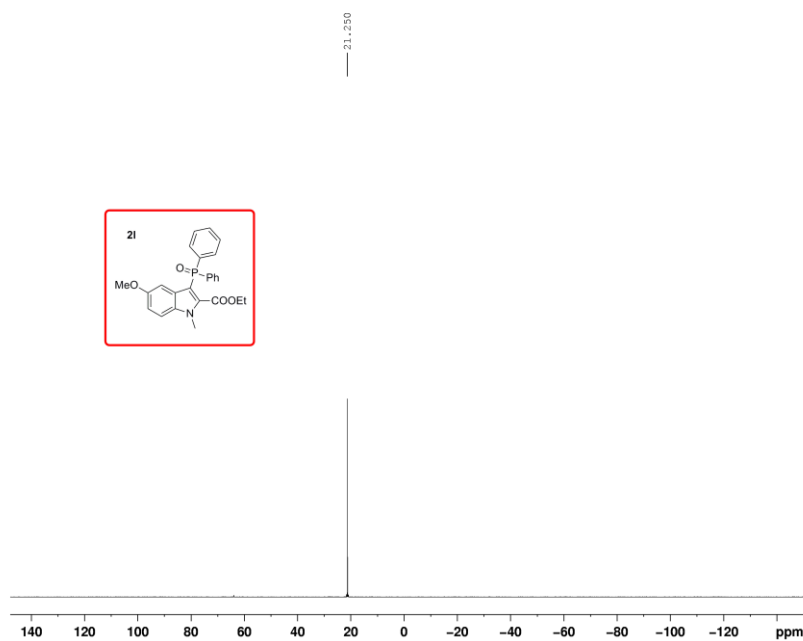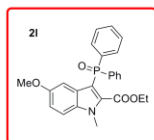

```

NAME      zhouak120331-P-OMe
EXPNO     1
PROCNO    1
Date_     20120331
Time      18.23
INSTRUM   spect
PROBHD    5 mm F4BBO BB-
PULPROG   zgpg30
TD         65536
SOLVENT   CDCl3
NS         16
DS         4
SWH        64102.563 Hz
FIDRES     0.978127 Hz
AQ         0.5112308 sec
RG         2050
CW         7.800 usec
DE         6.50 usec
TE         296.4 K
D1         2.0000000 sec
D11        0.0300000 sec
TDO        1

```

```

===== CHANNEL f1 =====
NUC1       31P
P1         10.80 usec
PL1        0.00 dB
PL1W       26.12361908 W
SFO1       161.3676962 MHz

```

```

===== CHANNEL f2 =====
CPDPRG2    waltz16
NUC2       1H
PCPD2      80.00 usec
PL2         -2.10 dB
PL12        13.90 dB
PL13        13.90 dB
PL2W       17.72104293 W
PL12W       0.44513249 W
PL13W       0.44513249 W
SFO2       400.1316005 MHz
S1         32768
SF         161.9755930 MHz
WDW         EM
SSB         0
LB          1.00 Hz
GB          0
PC          1.60

```

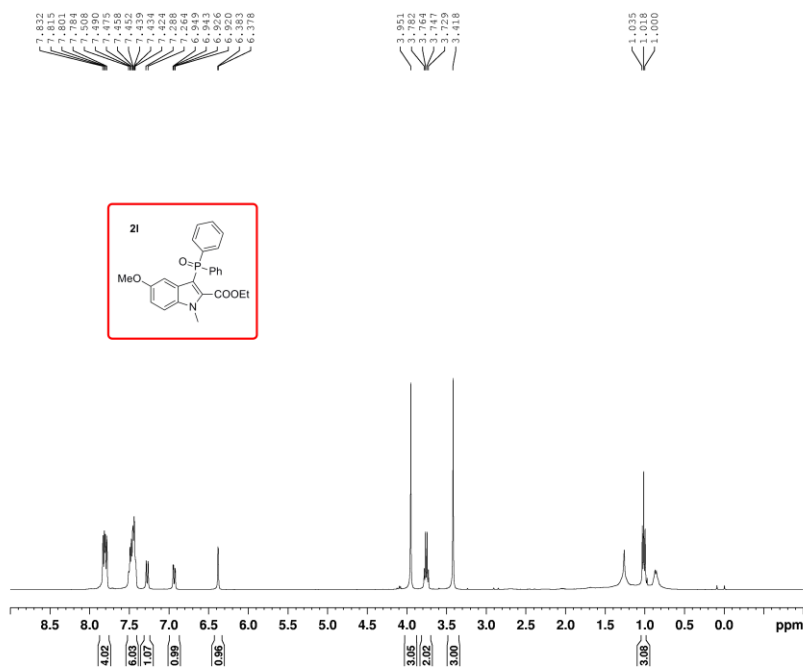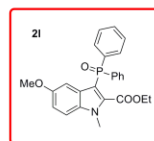

```

NAME      zhouak120331-P-OMe
EXPNO     1
PROCNO    1
Date_     20120331
Time      18.23
INSTRUM   spect
PROBHD    5 mm F4BBO BB-
PULPROG   zgpg30
TD         65536
SOLVENT   CDCl3
NS         16
DS         4
SWH        8223.685 Hz
FIDRES     0.125483 Hz
AQ         3.3646387 sec
RG         60.3
CW         6.800 usec
DE         6.50 usec
TE         295.4 K
D1         1.0000000 sec
TDO        1

```

```

===== CHANNEL f1 =====
NUC1       1H
P1         14.70 usec
PL1        -1.00 dB
PL1W       13.75590801 W
SFO1       400.1324710 MHz
S1         32768
SF         400.1299932 MHz
WDW         EM
SSB         0
LB          0.30 Hz
GB          0
PC          1.00

```

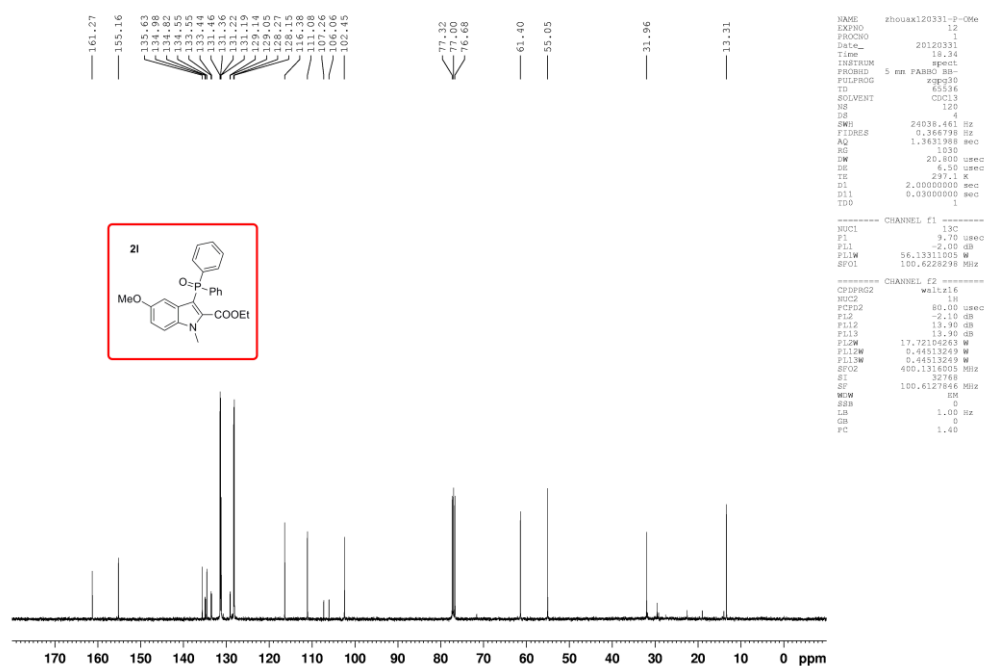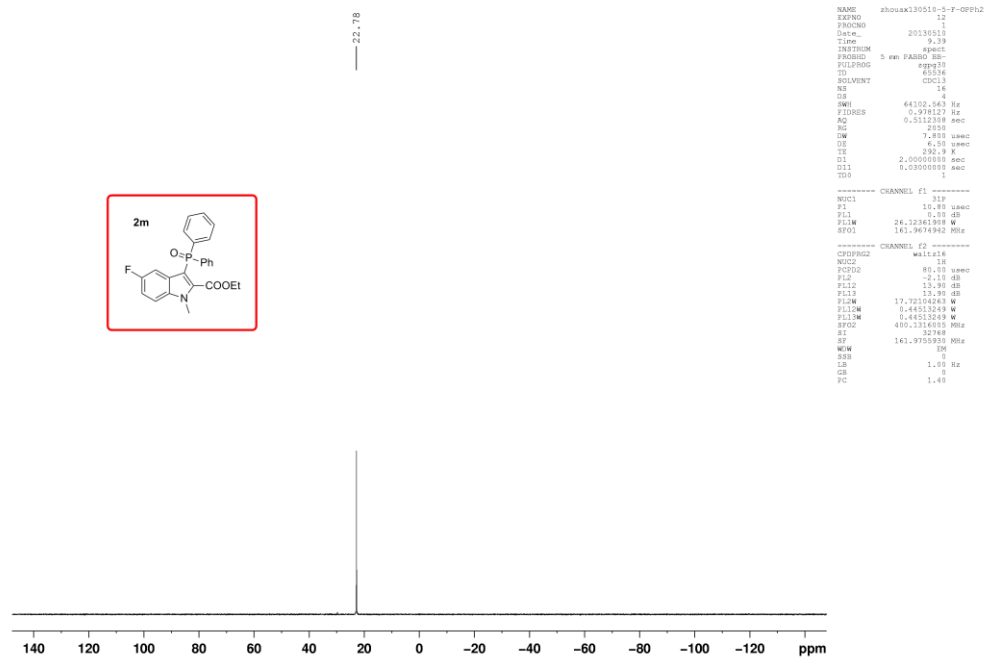





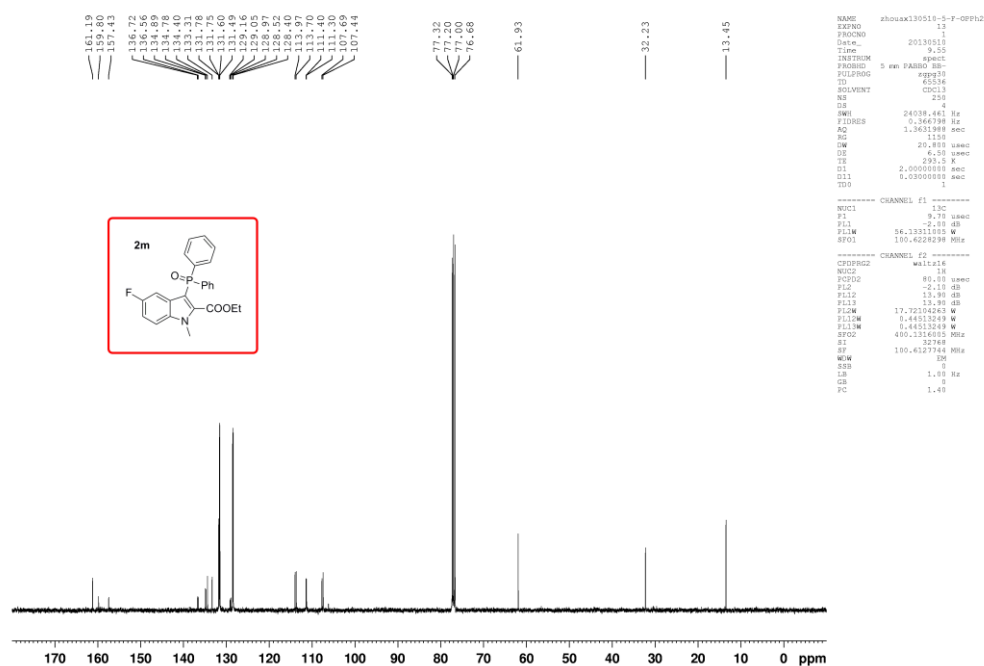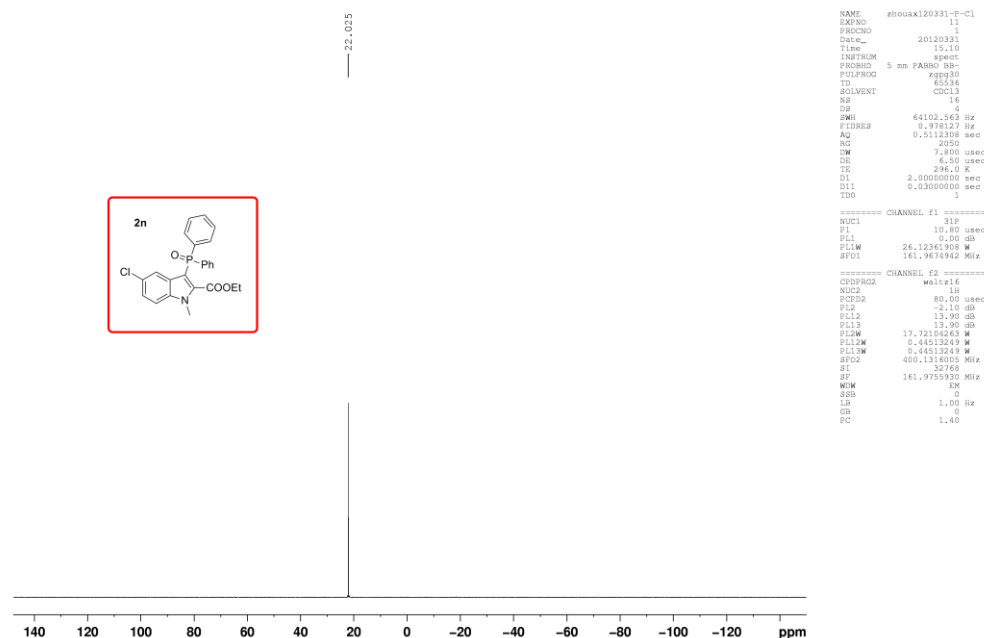

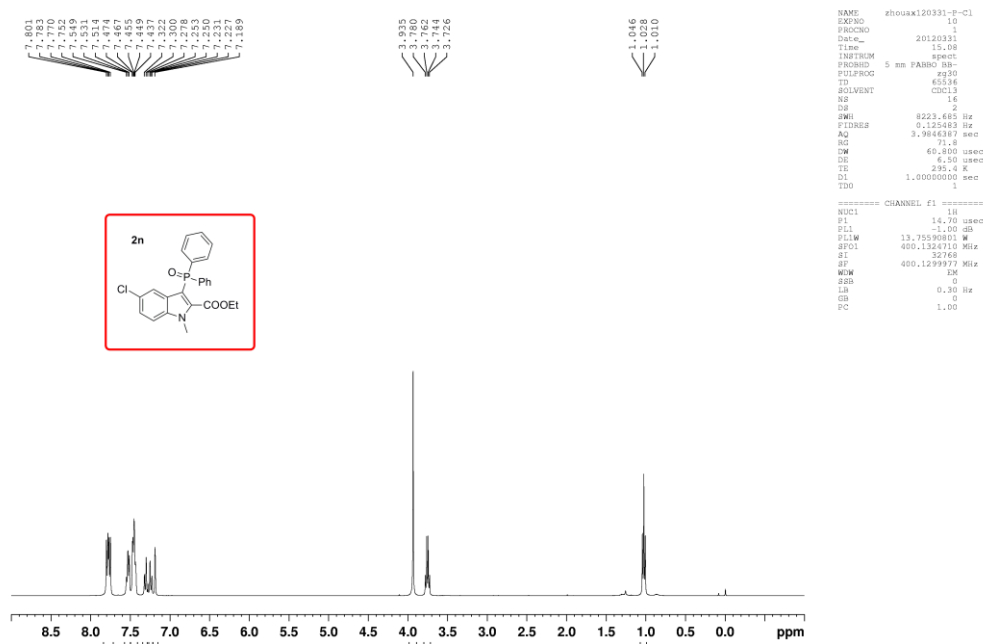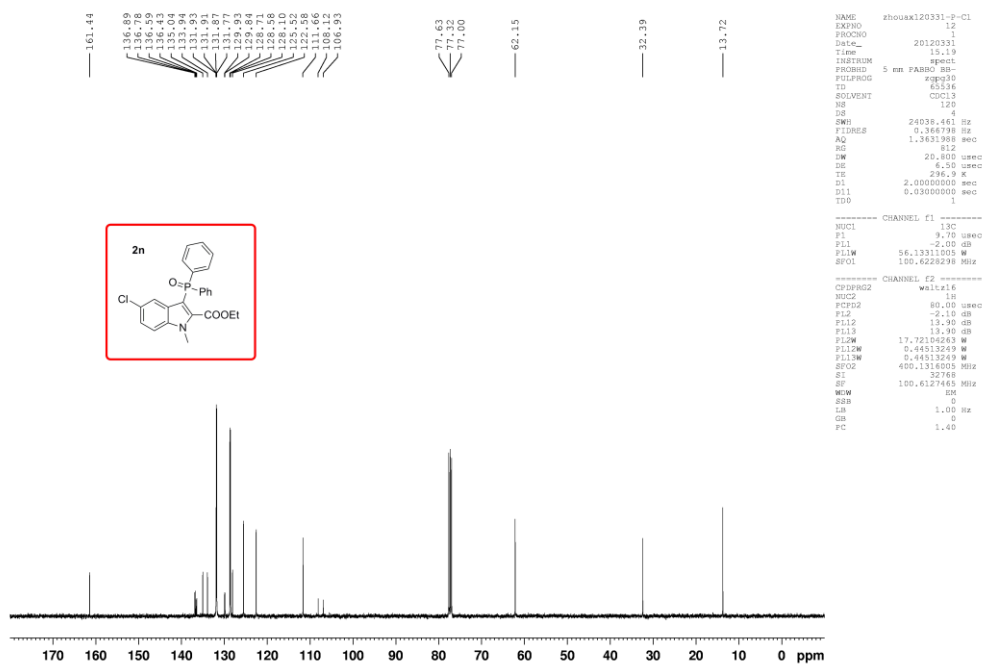

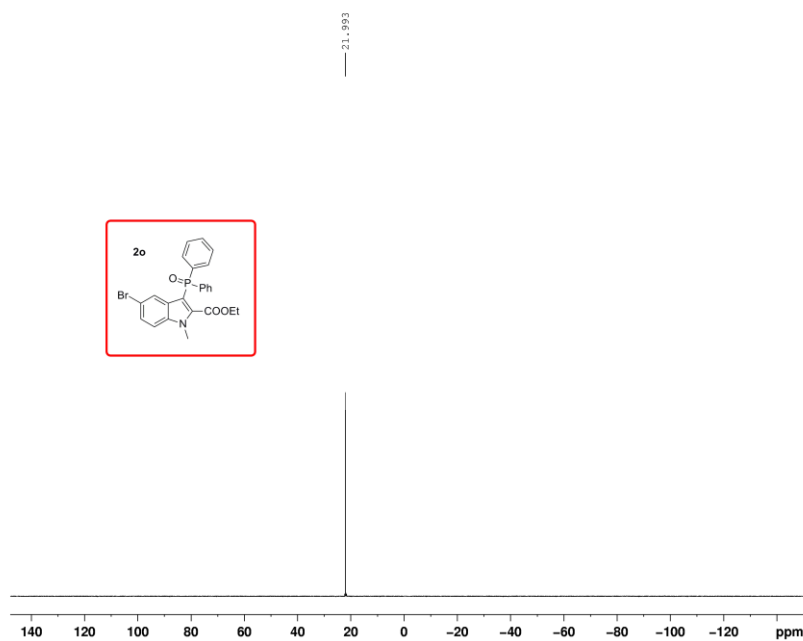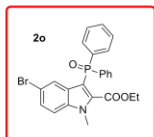

```

NAME      zhouax120331-F-Br
EXPNO     1
PROCNO    1
Date_     20120331
Time      14.53
INSTRUM    spect
PROBHD     5 mm F4BBO BB-
PULPROG    zgpg30
TD         65536
SOLVENT    CDCl3
NS         16
DS         4
SWH         64102.563 Hz
FIDRES     0.978127 Hz
AQ         0.5112308 sec
RG         2050
CW         7.800 usec
DE         6.50 usec
TE         295.2 K
D1         2.0000000 sec
D11        0.0300000 sec
TDO        1

```

```

===== CHANNEL f1 =====
NUC1       31P
P1         10.80 usec
PL1        0.00 dB
PL1W       26.12361908 W
SFO1       161.9676962 MHz

```

```

===== CHANNEL f2 =====
CPDPRG2    waltz16
NUC2        1H
PCPD2      80.00 usec
PL2         -2.10 dB
PL12        13.90 dB
PL13        13.90 dB
PL12W       17.72104263 W
PL13W       0.44513249 W
PL14W       0.44513249 W
SFO2        400.1316025 MHz
S1         32768
SF         161.9755930 MHz
WDW         EM
SSB         0
LB         1.00 Hz
GB         0
PC         1.60

```

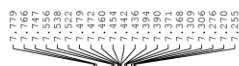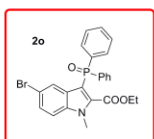

```

NAME      zhouax120331-F-Br
EXPNO     1
PROCNO    1
Date_     20120331
Time      14.51
INSTRUM    spect
PROBHD     5 mm F4BBO BB-
PULPROG    zg30
TD         65536
SOLVENT    CDCl3
NS         16
DS         4
SWH         8223.685 Hz
FIDRES     0.125483 Hz
AQ         3.3044387 sec
RG         11.8
CW         60.800 usec
DE         6.50 usec
TE         295.2 K
D1         1.0000000 sec
TDO        1

```

```

===== CHANNEL f1 =====
NUC1       1H
P1         14.70 usec
PL1        -1.00 dB
PL1W       13.75590801 W
SFO1       400.1324710 MHz
S1         32768
SF         400.1300015 MHz
WDW         EM
SSB         0
LB         0.30 Hz
GB         0
PC         1.00

```

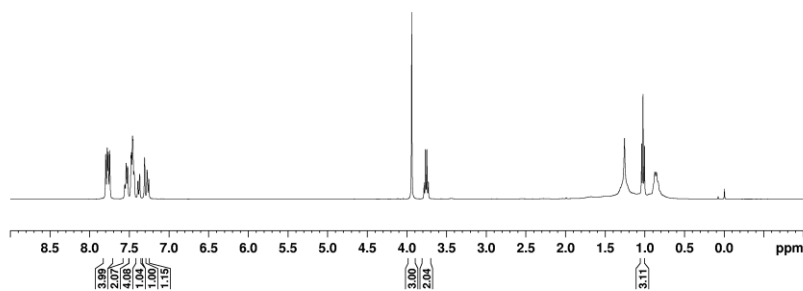

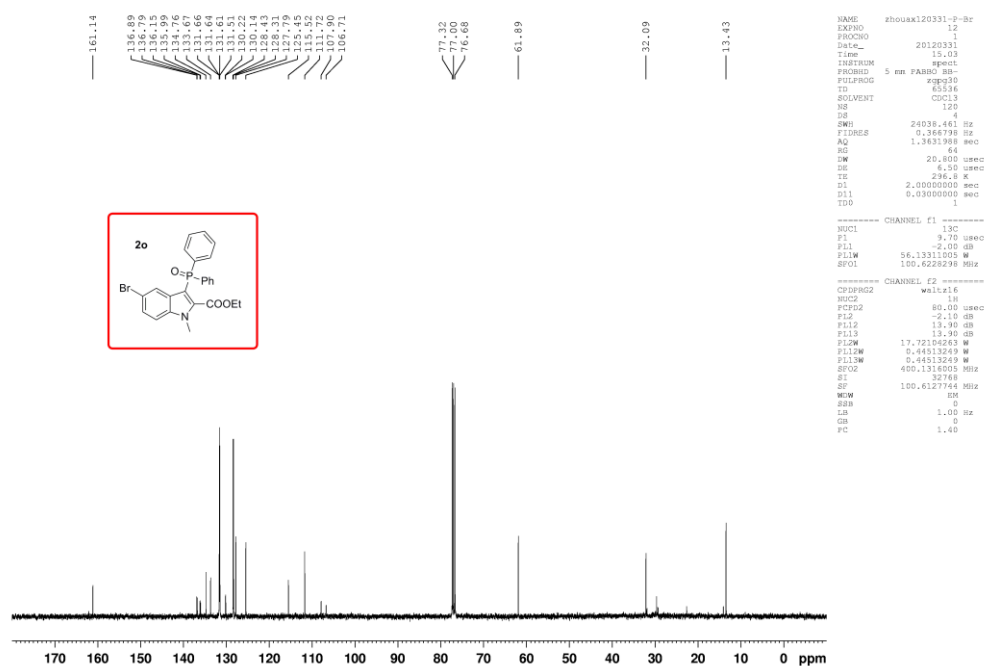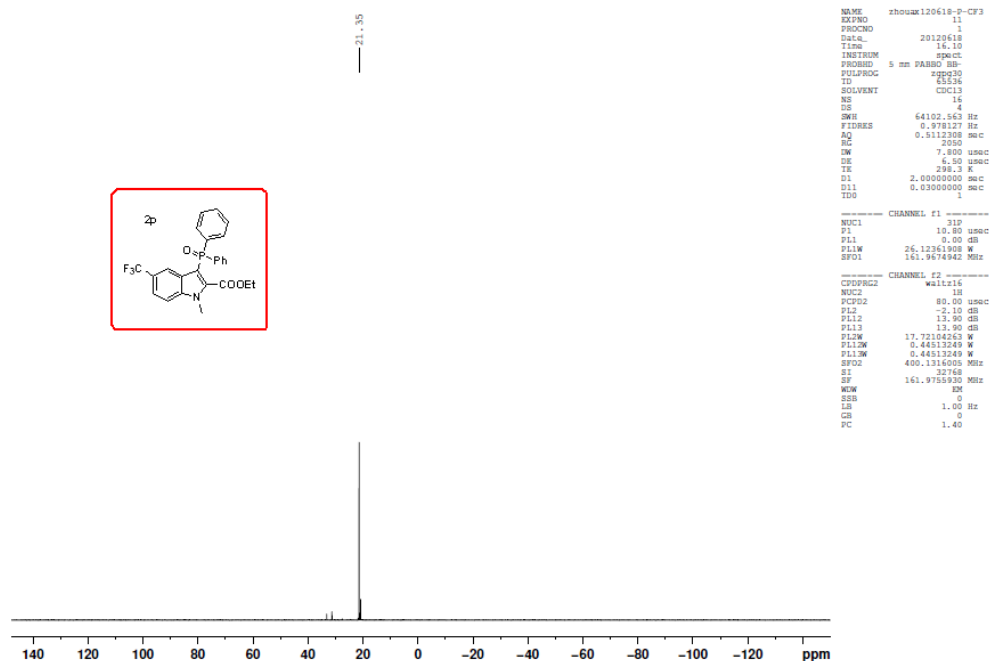

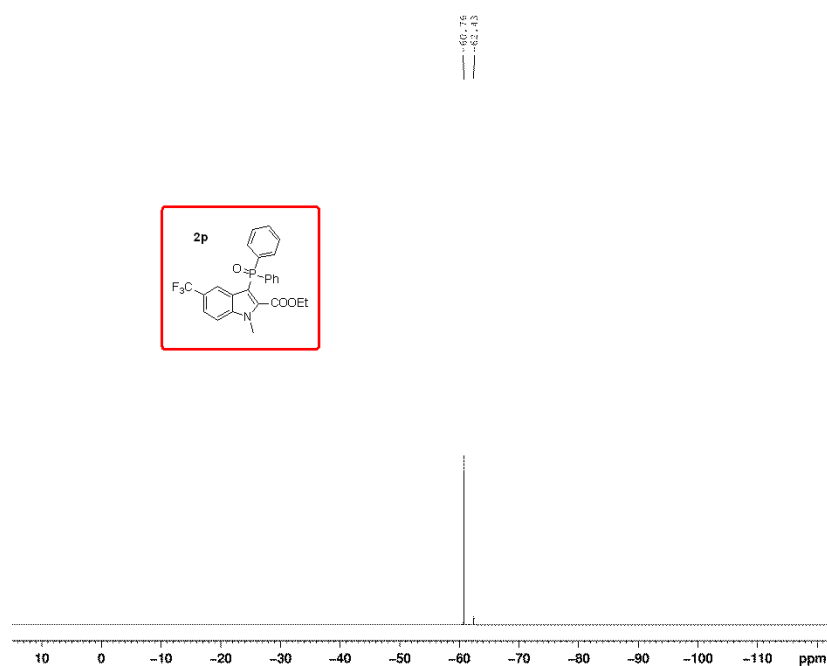

```

NAME      400MHz12018-0-CP3
EXPNO    1
PROCNO    1
DATE_     20120123
TIME      9.49
INSTRUM    spect
PROBHD    5 mm PABBO BB-
PULPROG    zgpg30
TD        65536
SOLVENT    CDCl3
NS         16
DS         4
SWH        8223.655 Hz
FIDRES     0.125483 Hz
AQ         3.984337 sec
RG         655
WDW         EM
SSB         0
LB          0.30 Hz
GB          0
PC          1.00
  
```

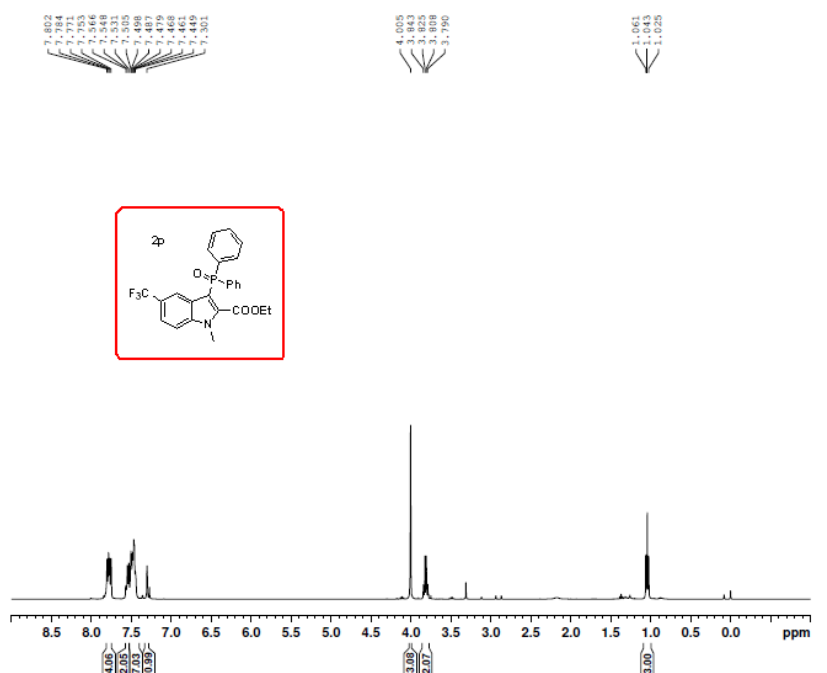

```

NAME      shouei120618-0-CP3
EXPNO    1
PROCNO    1
DATE_     20120618
TIME      16.07
INSTRUM    spect
PROBHD    5 mm PABBO BB-
PULPROG    zgpg30
TD        65536
SOLVENT    CDCl3
NS         16
DS         4
SWH        8223.655 Hz
FIDRES     0.125483 Hz
AQ         3.984337 sec
RG         655
WDW         EM
SSB         0
LB          0.30 Hz
GB          0
PC          1.00
  
```

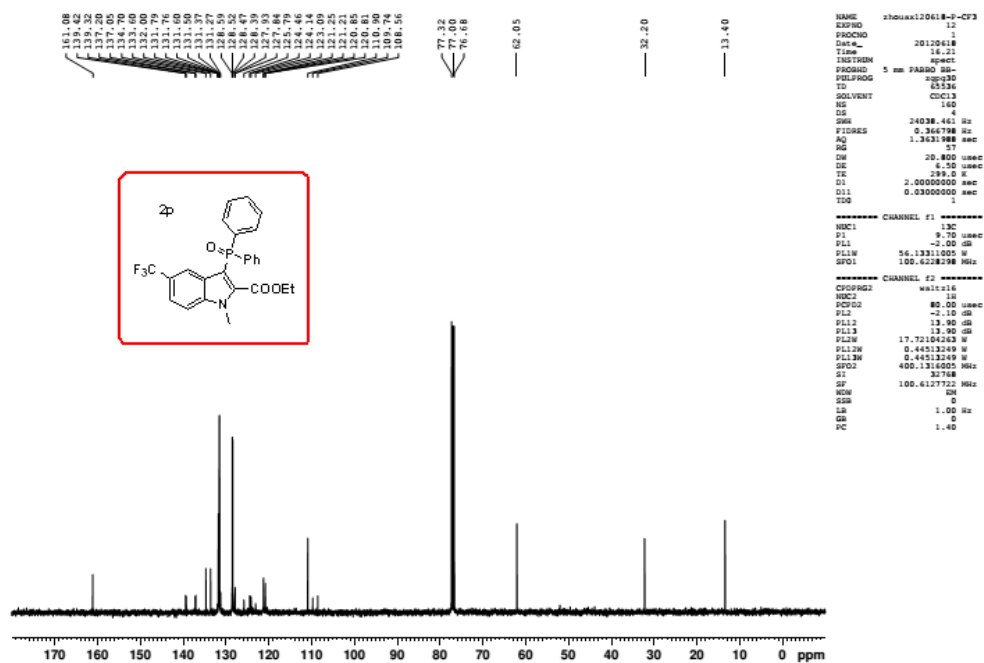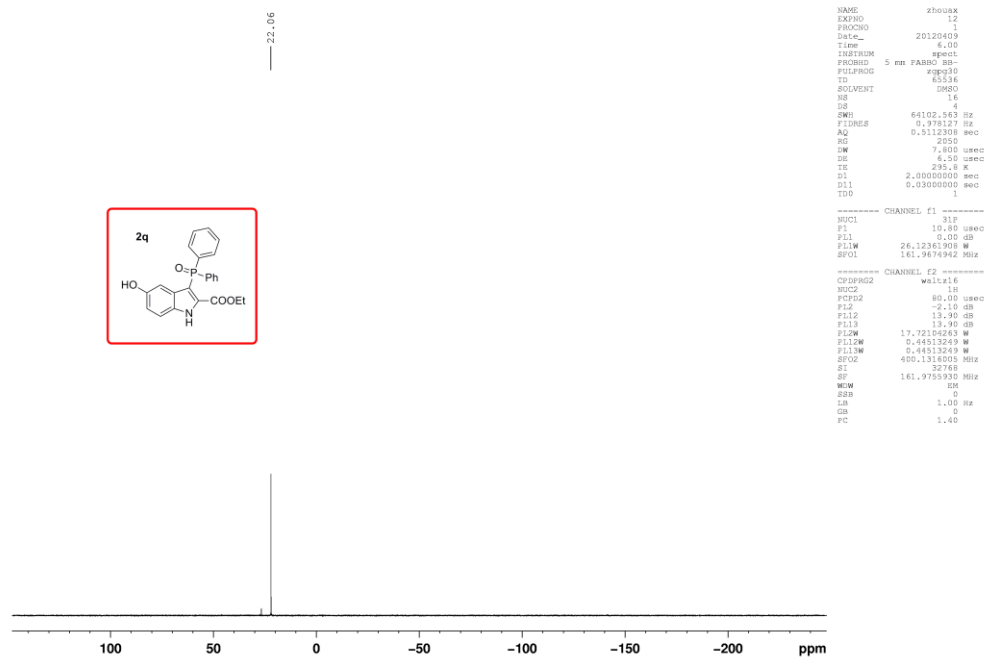



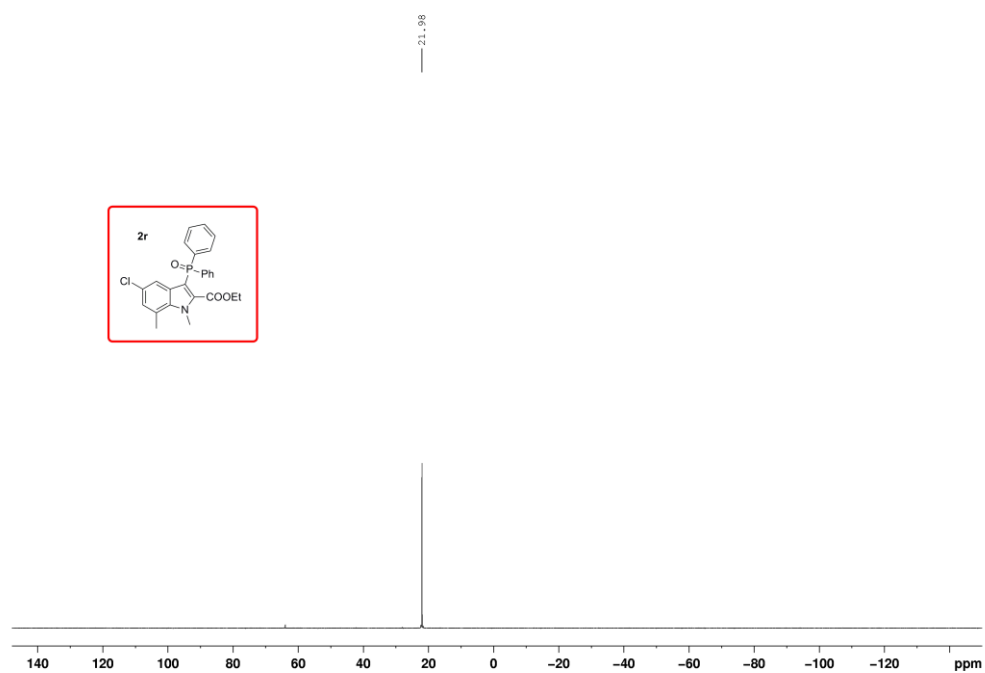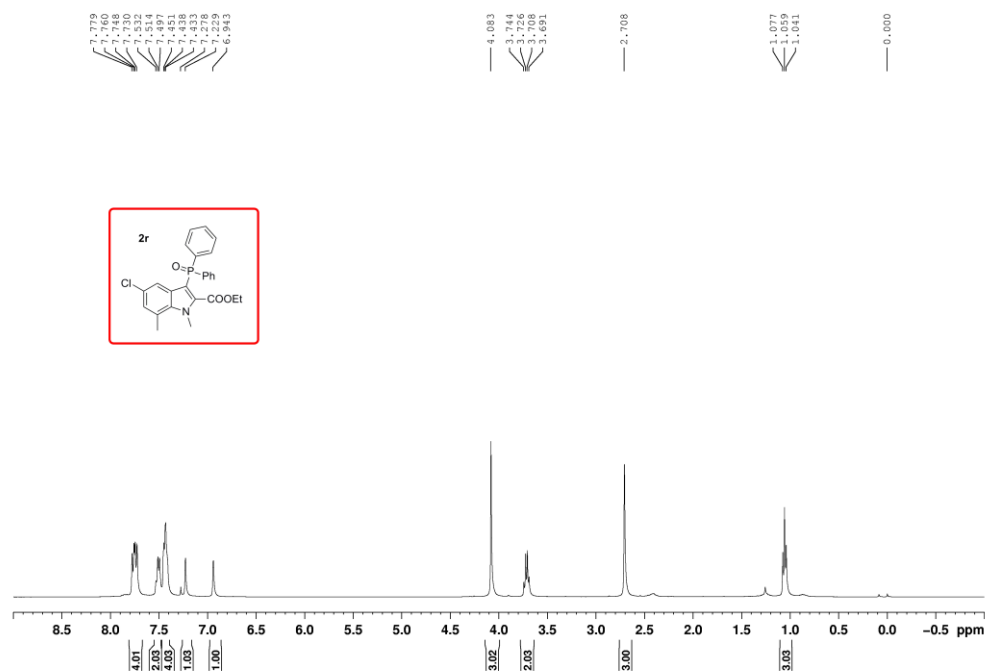



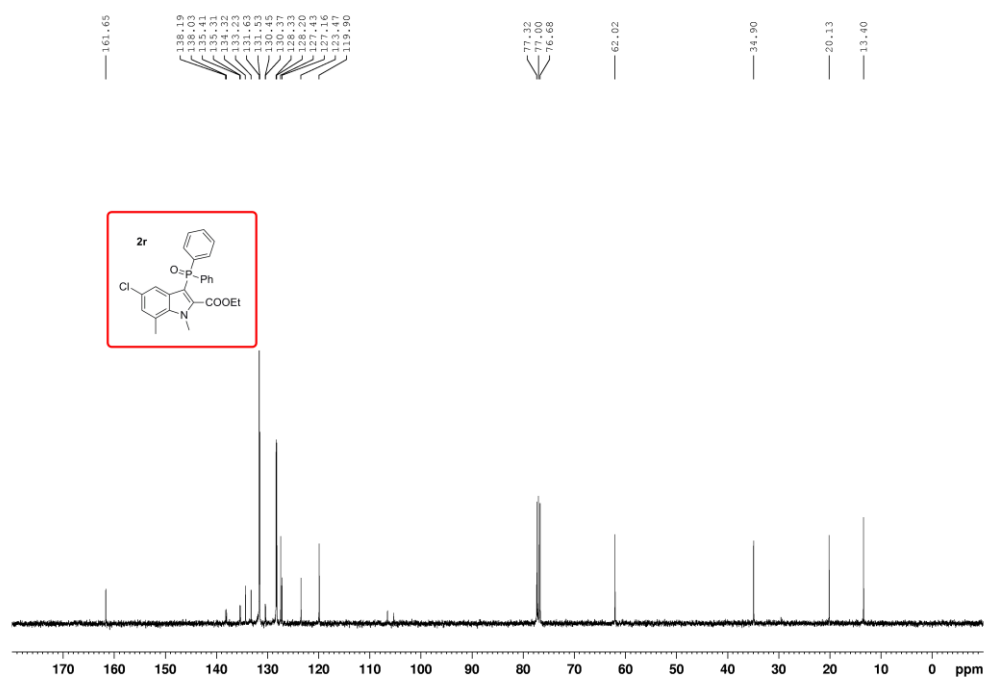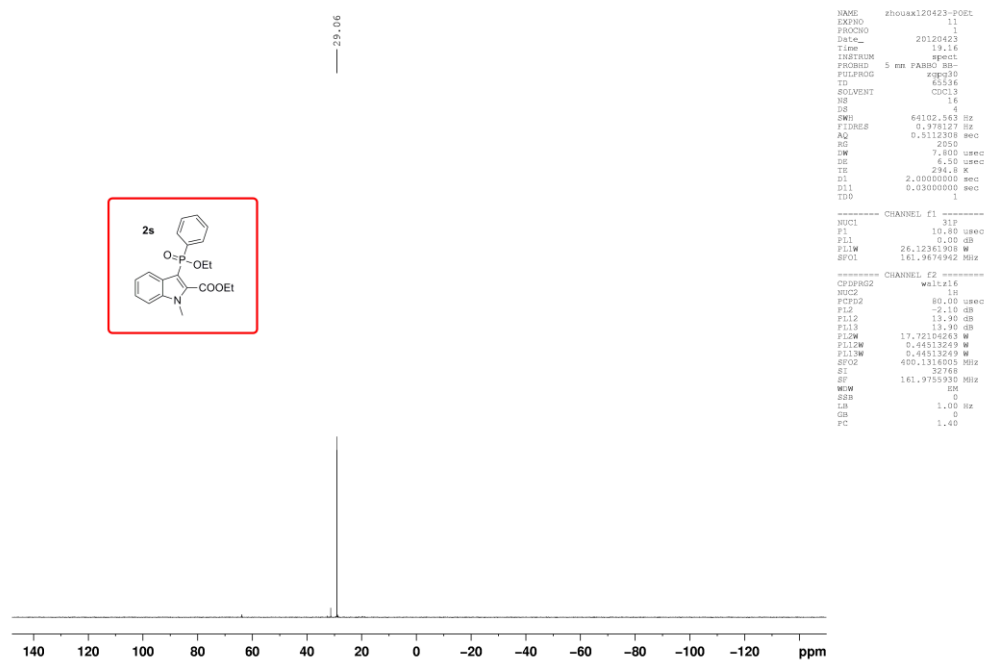

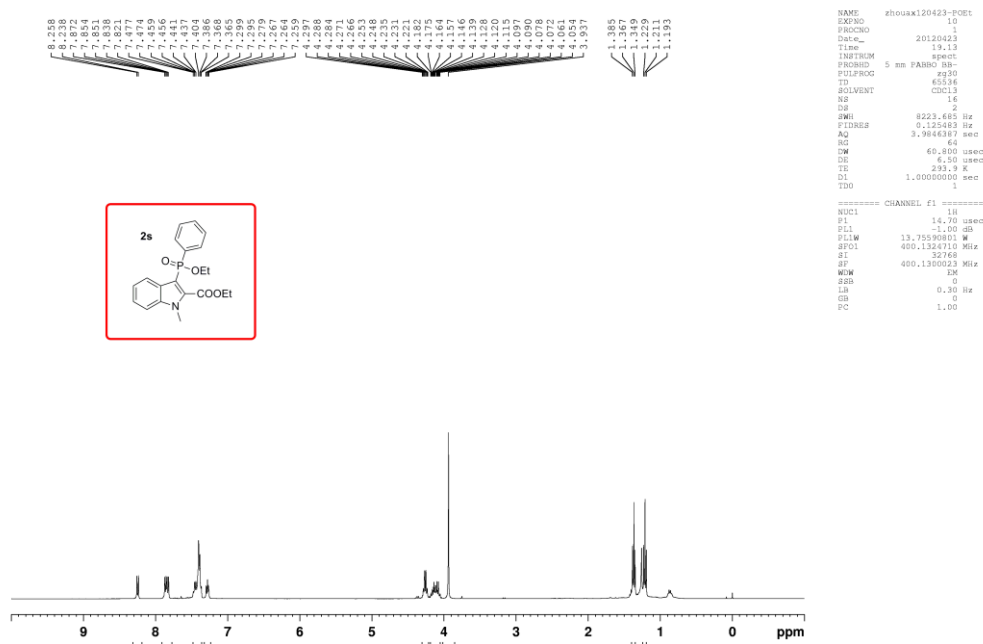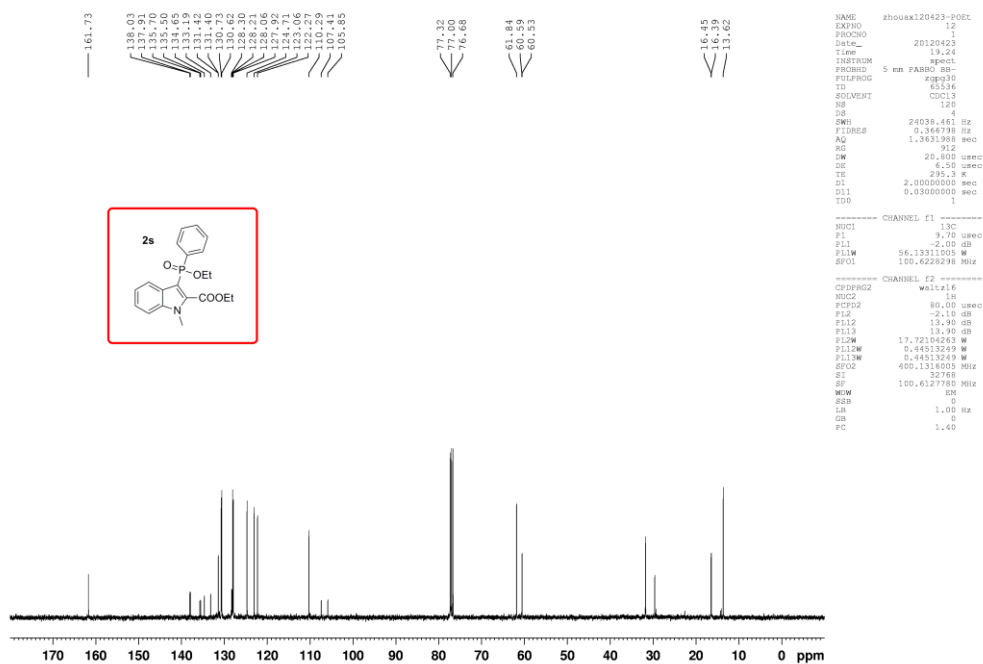

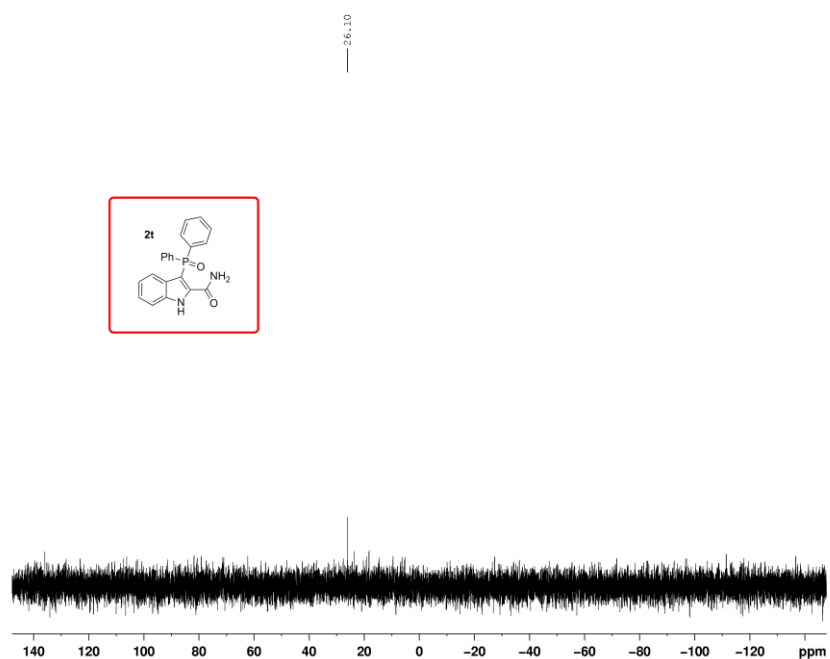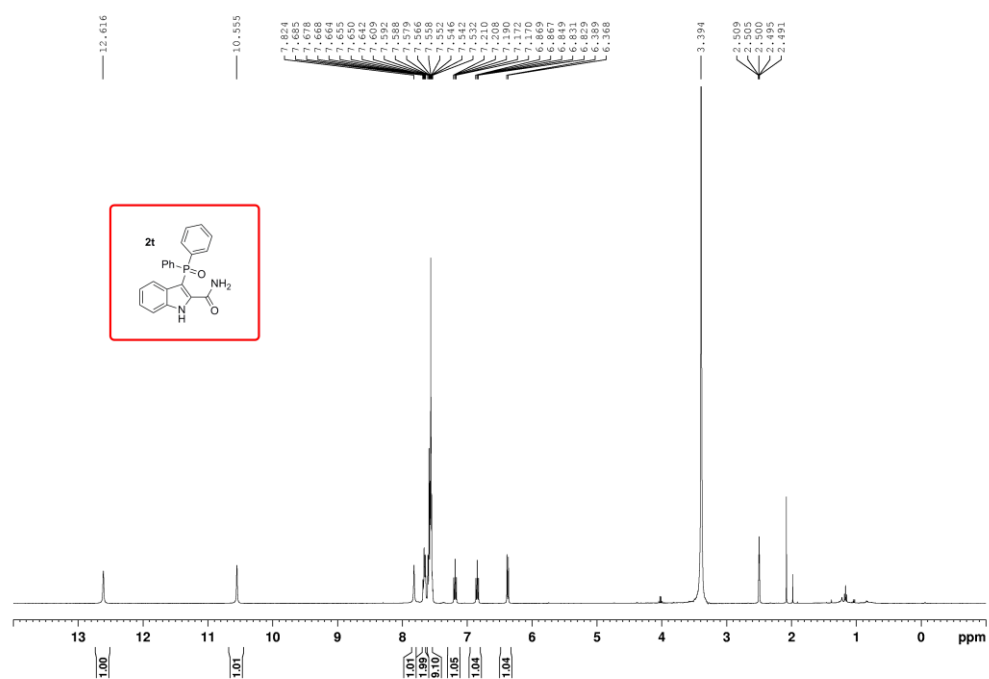

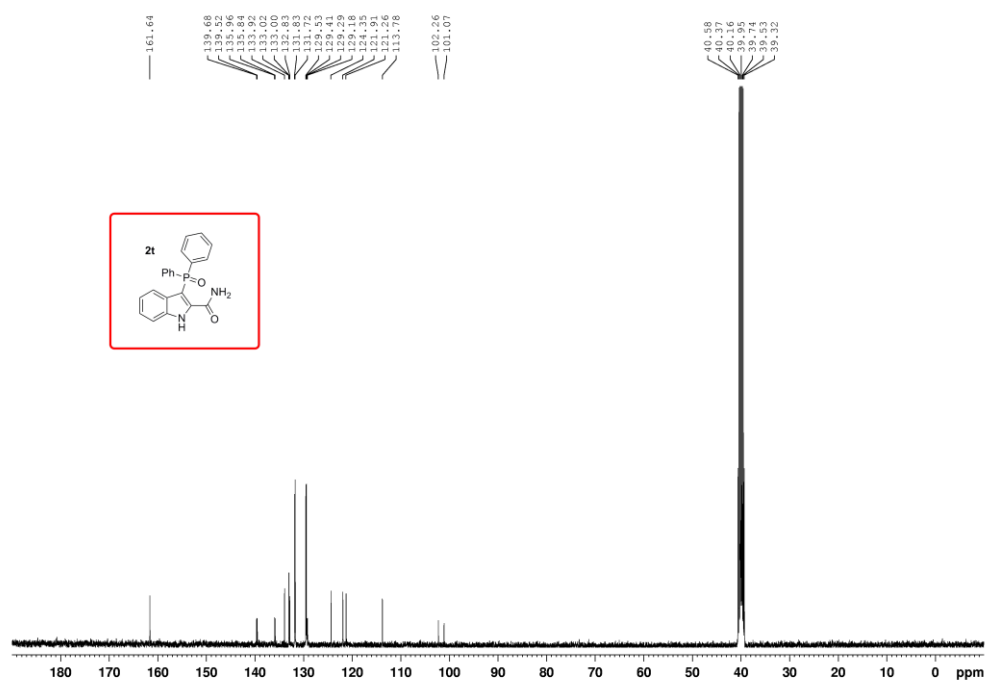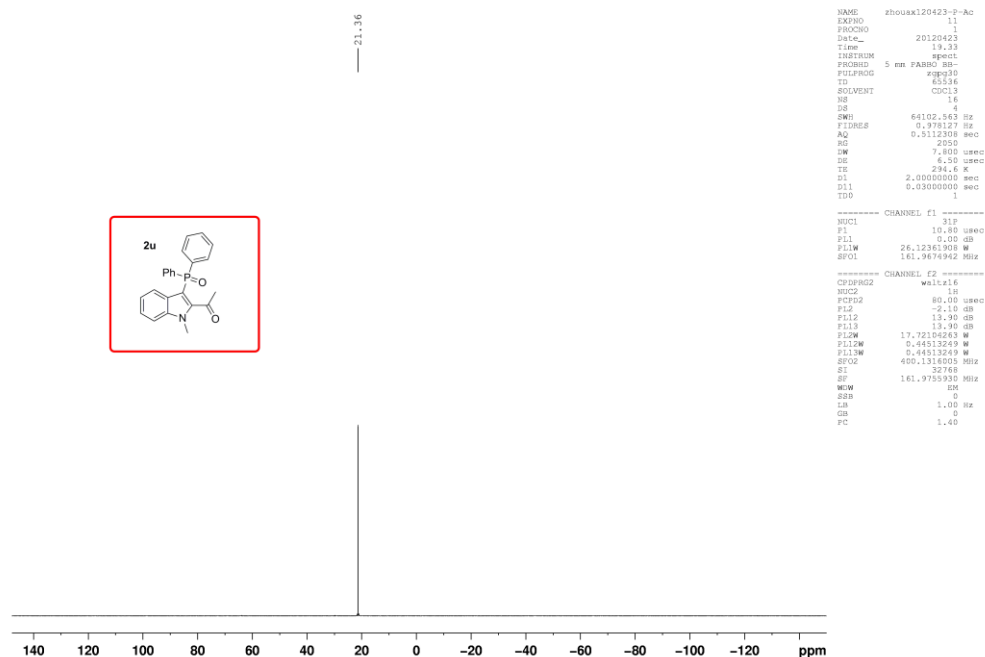

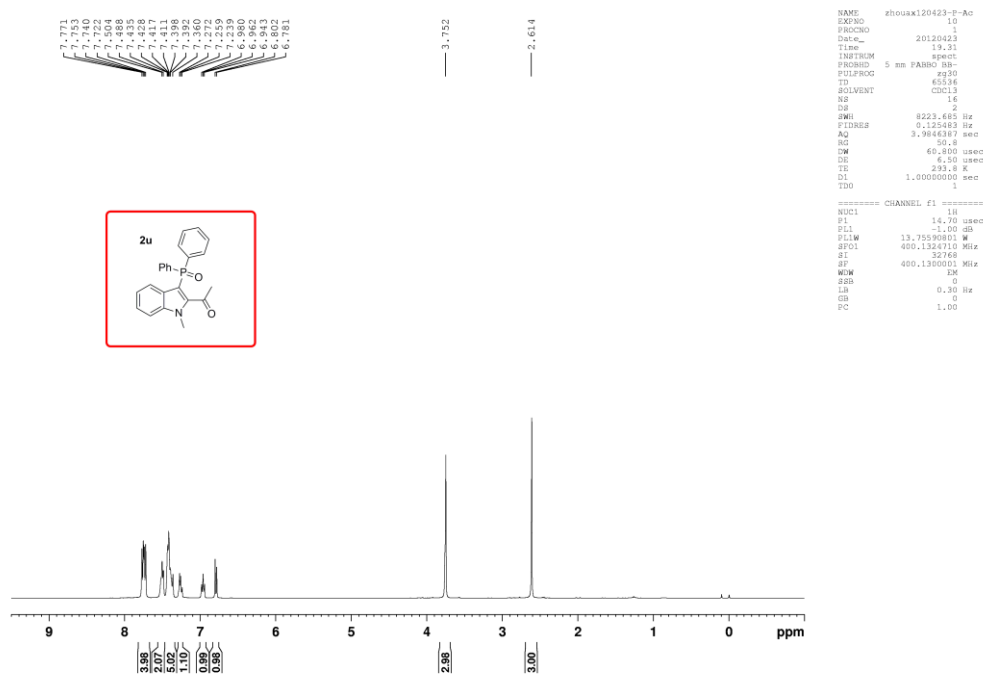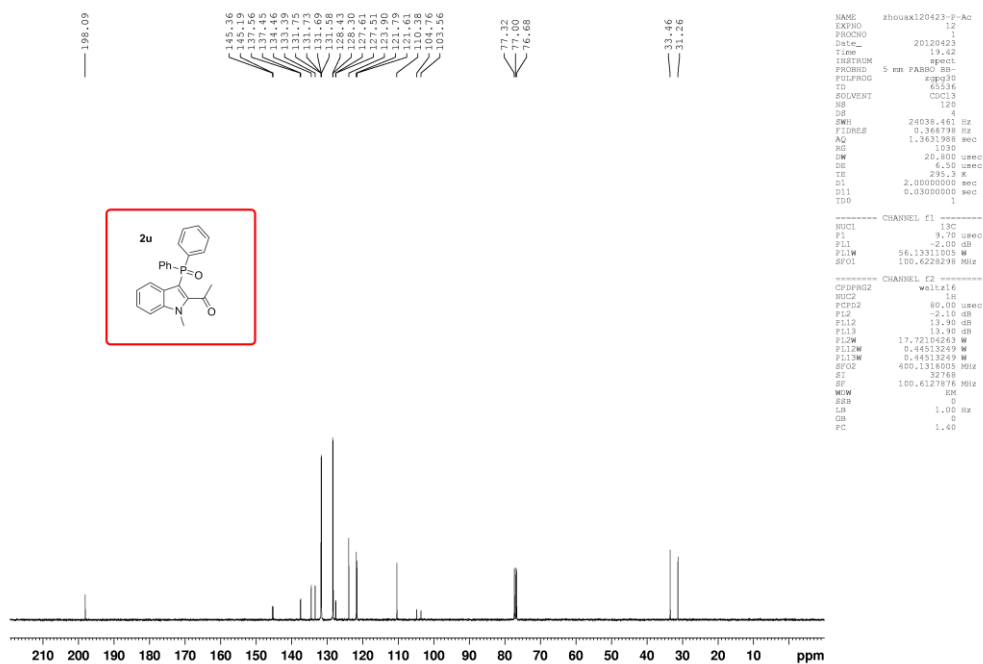

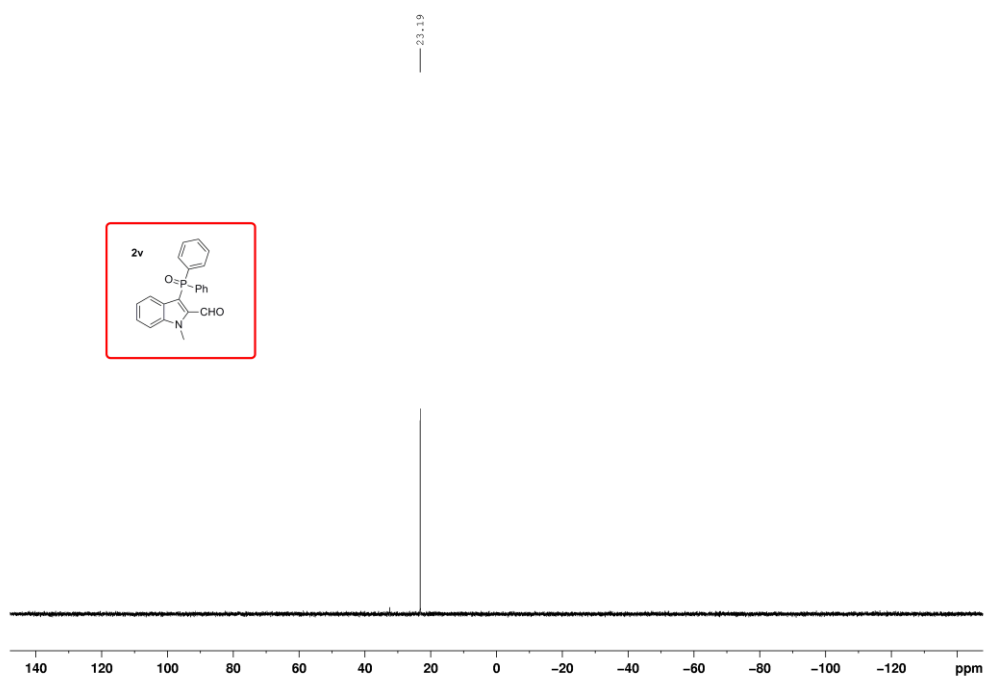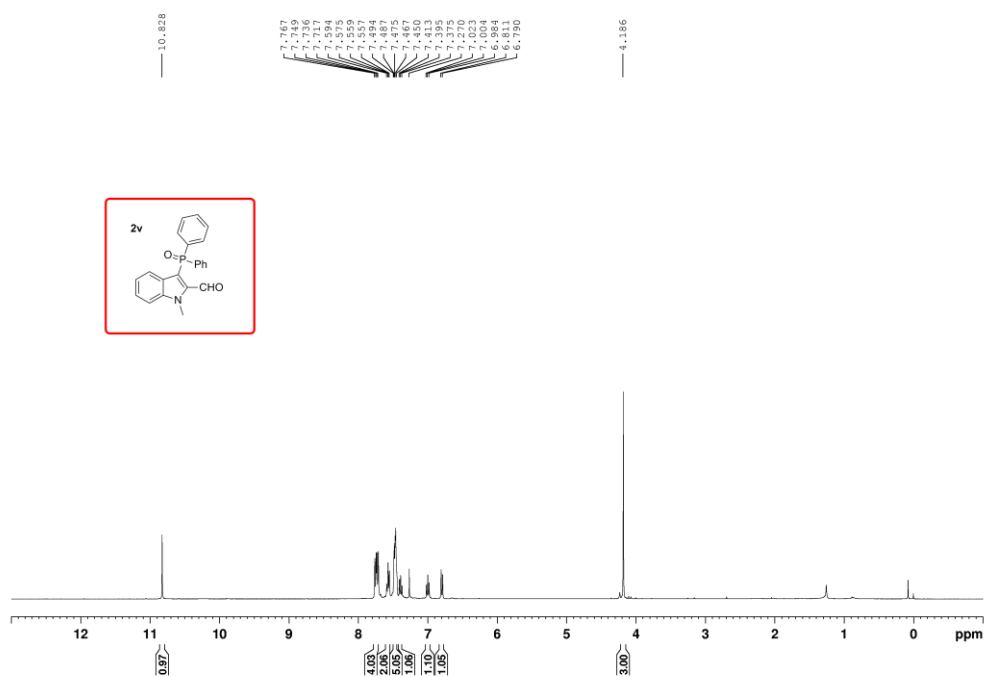

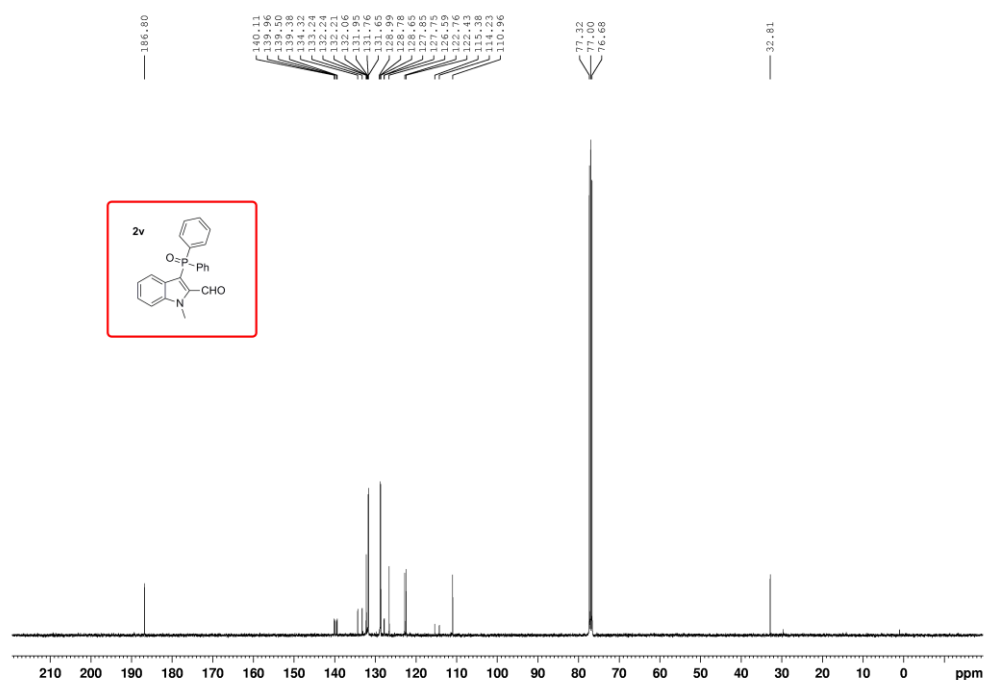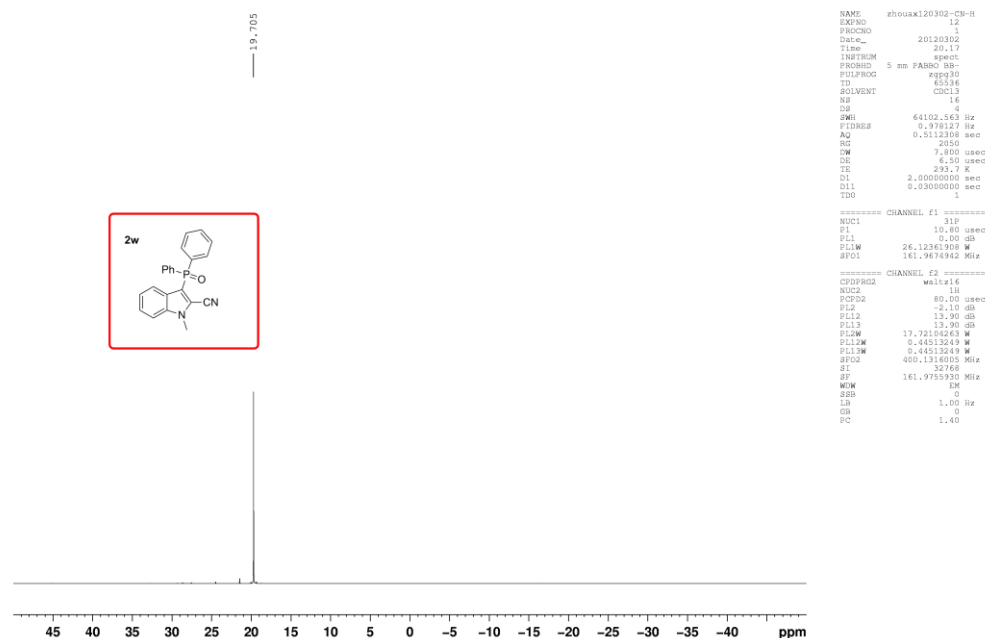

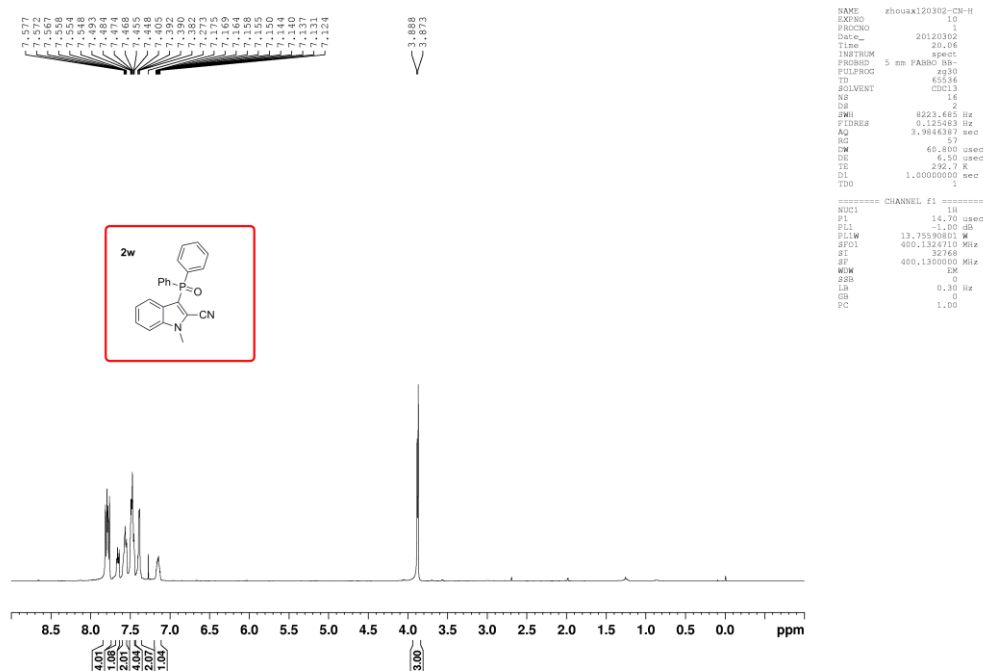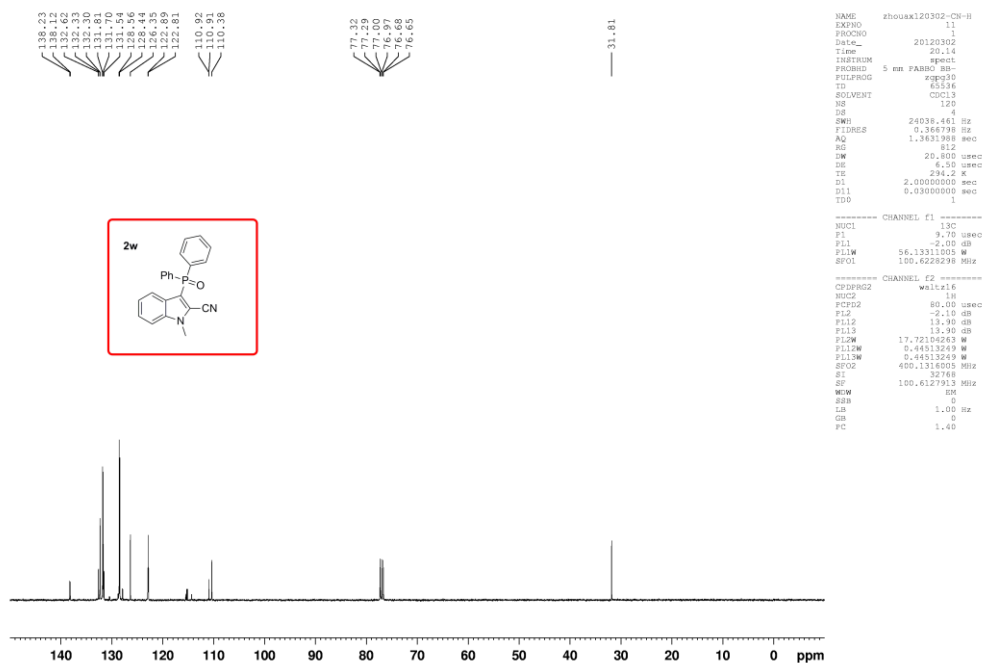



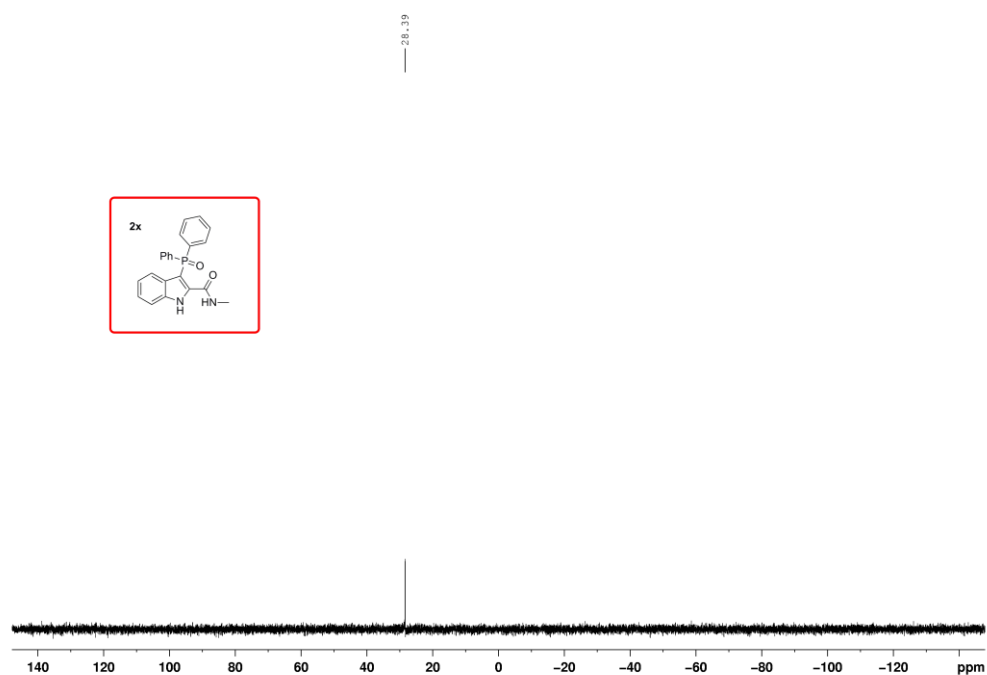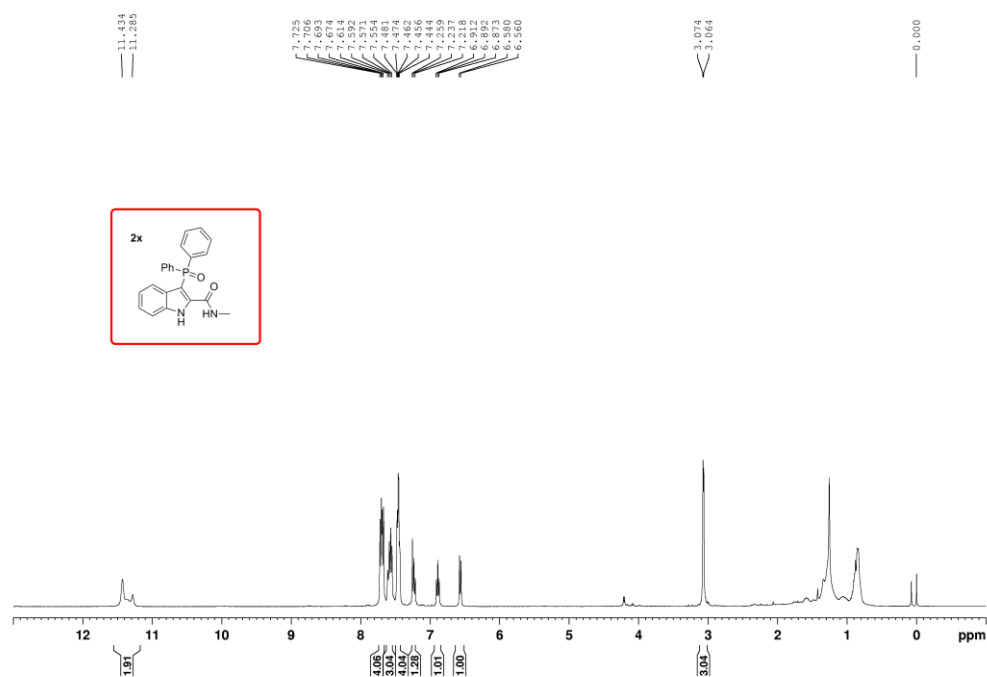

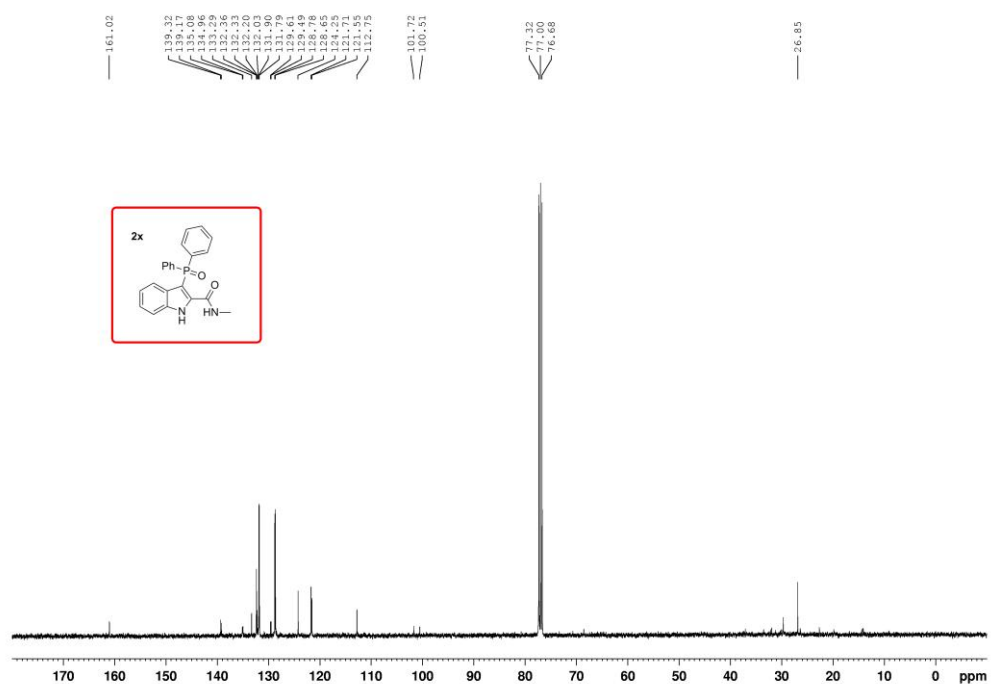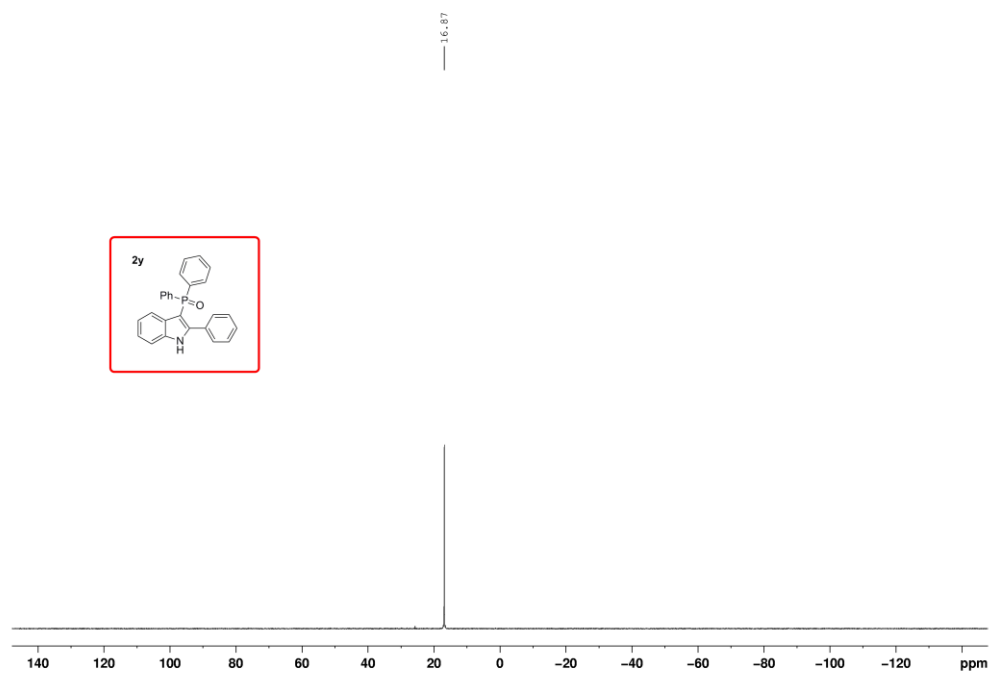

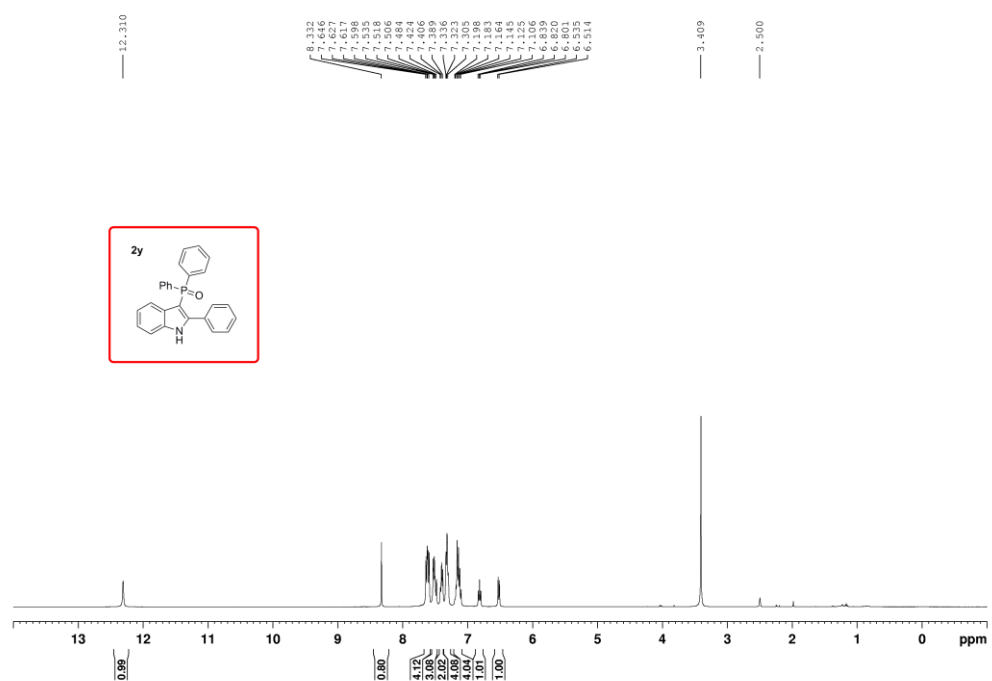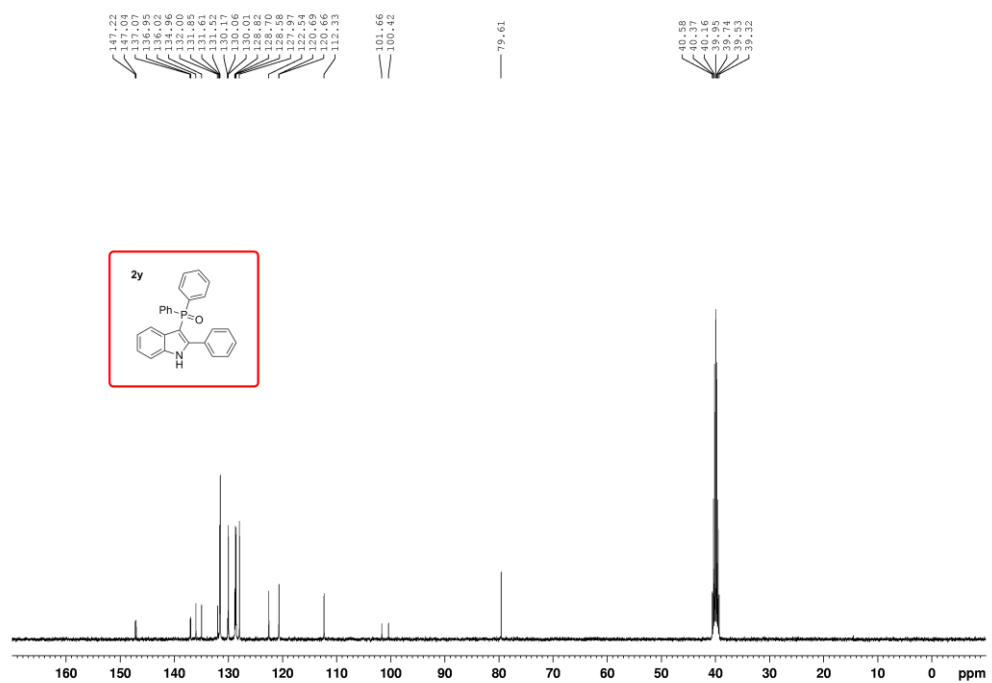

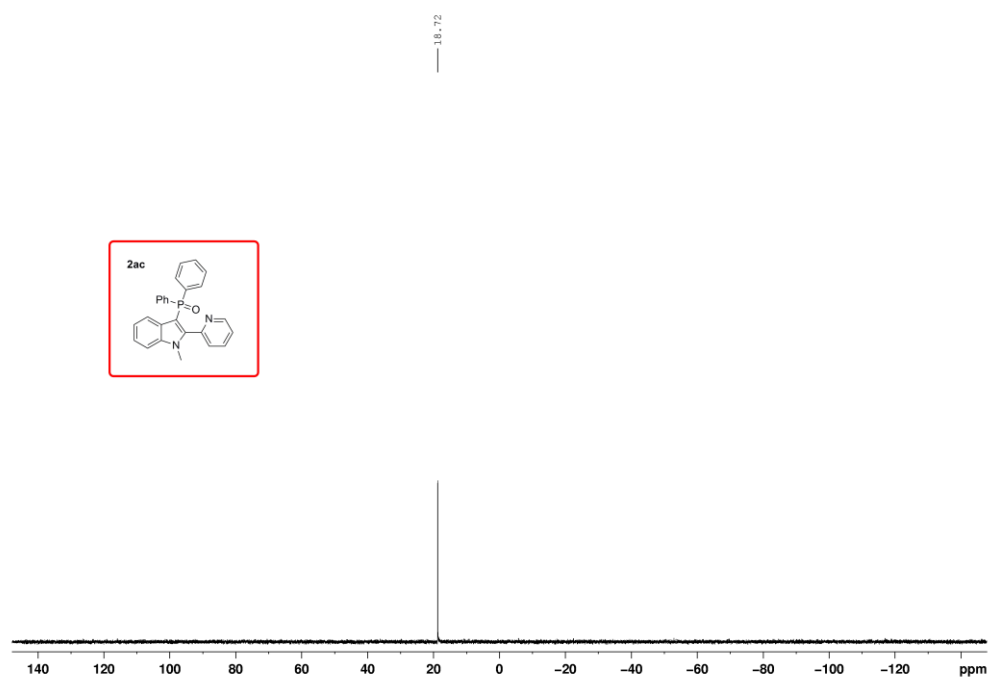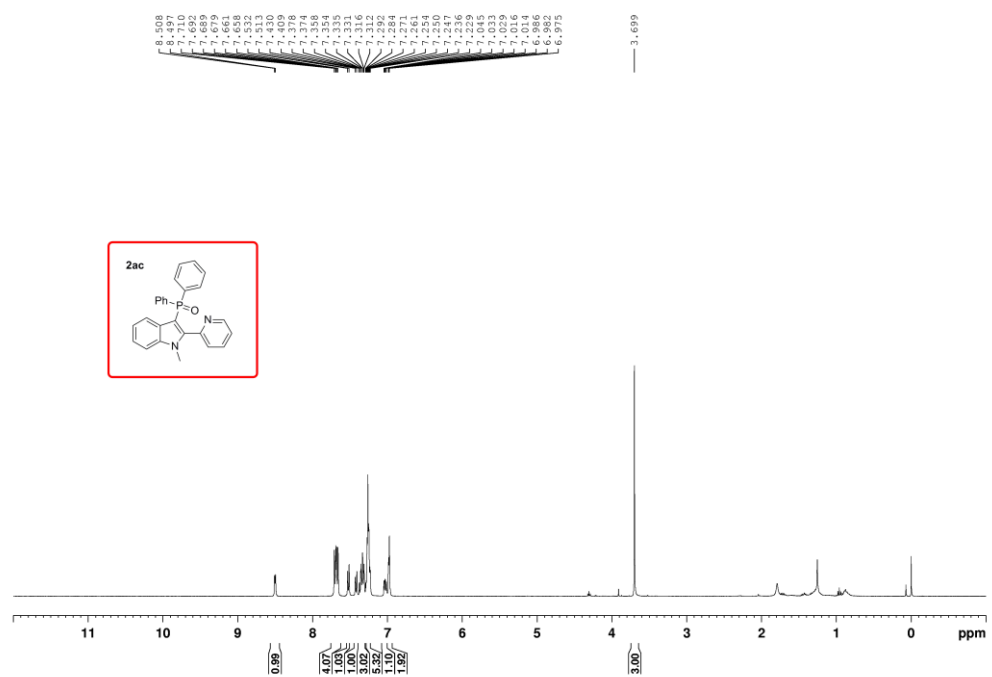

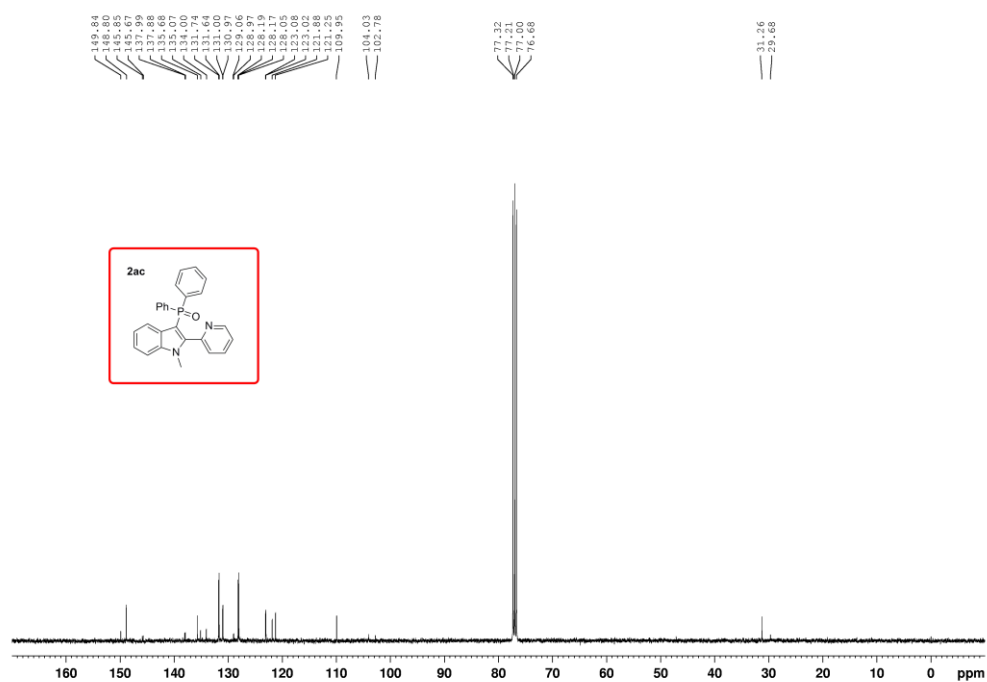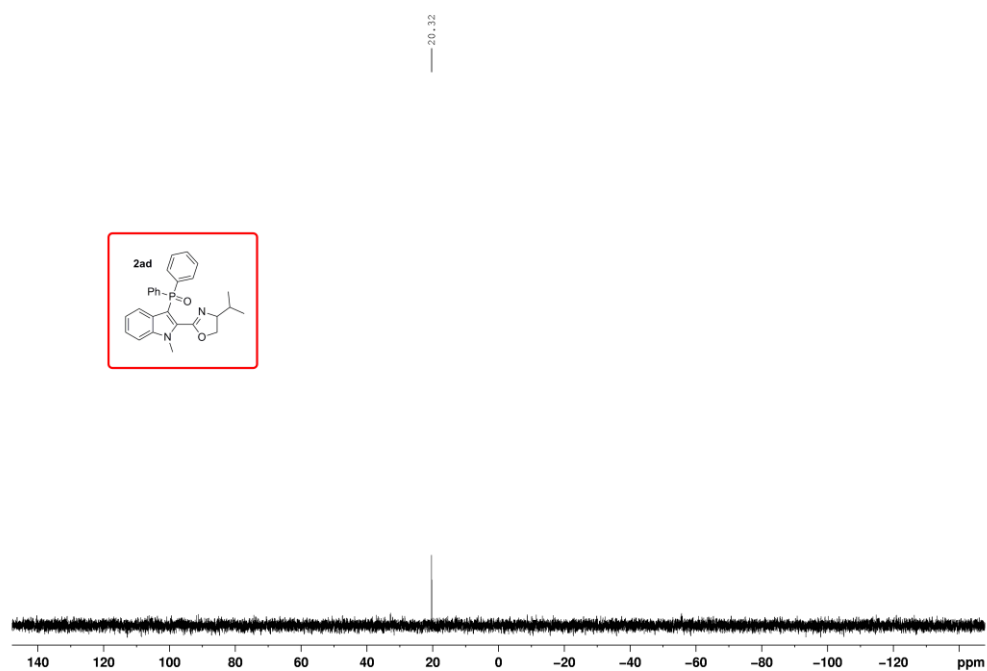

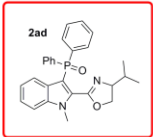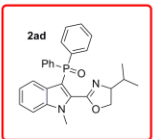

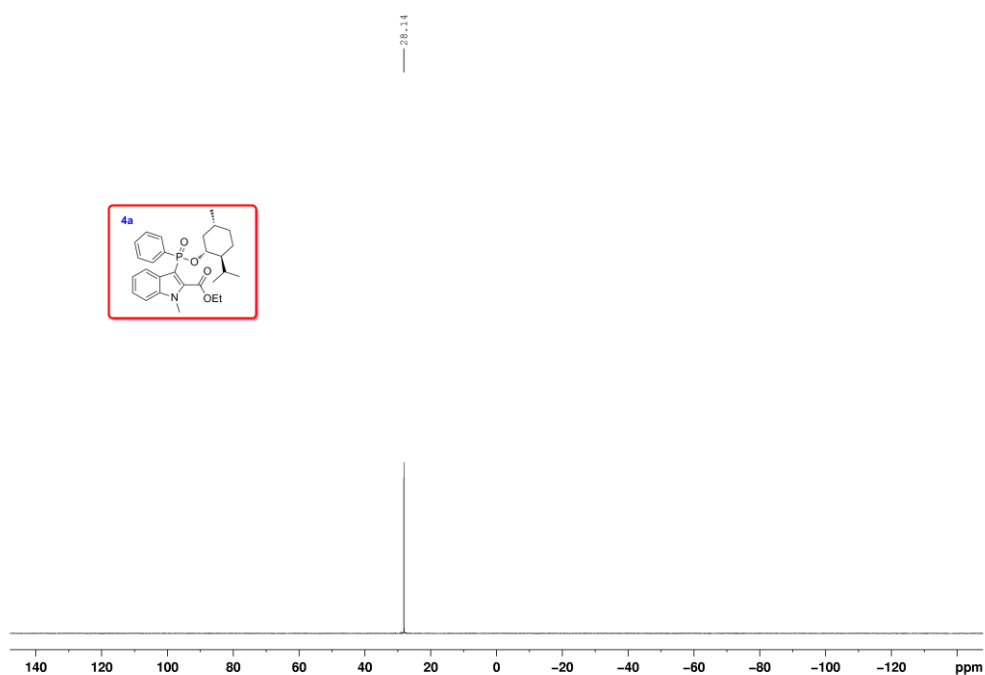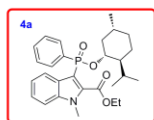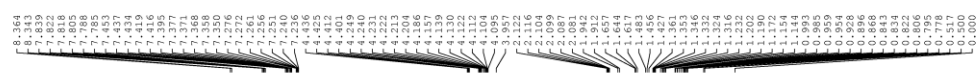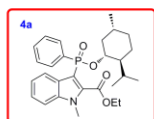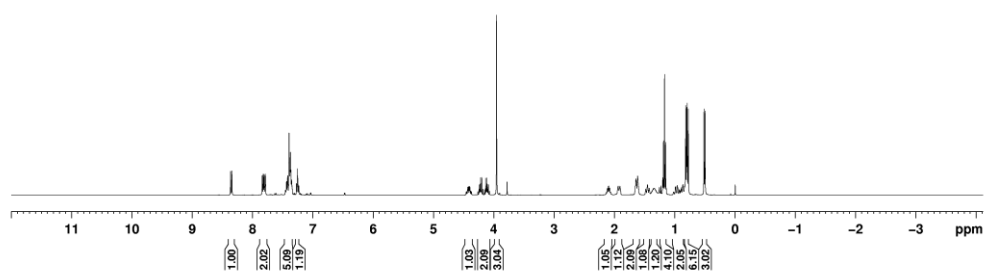

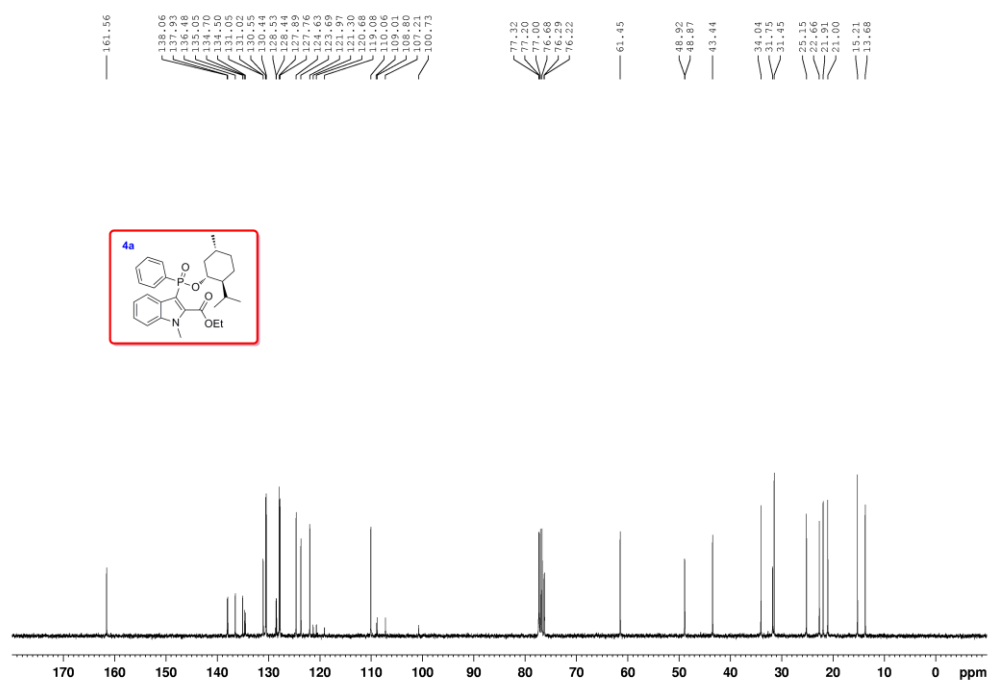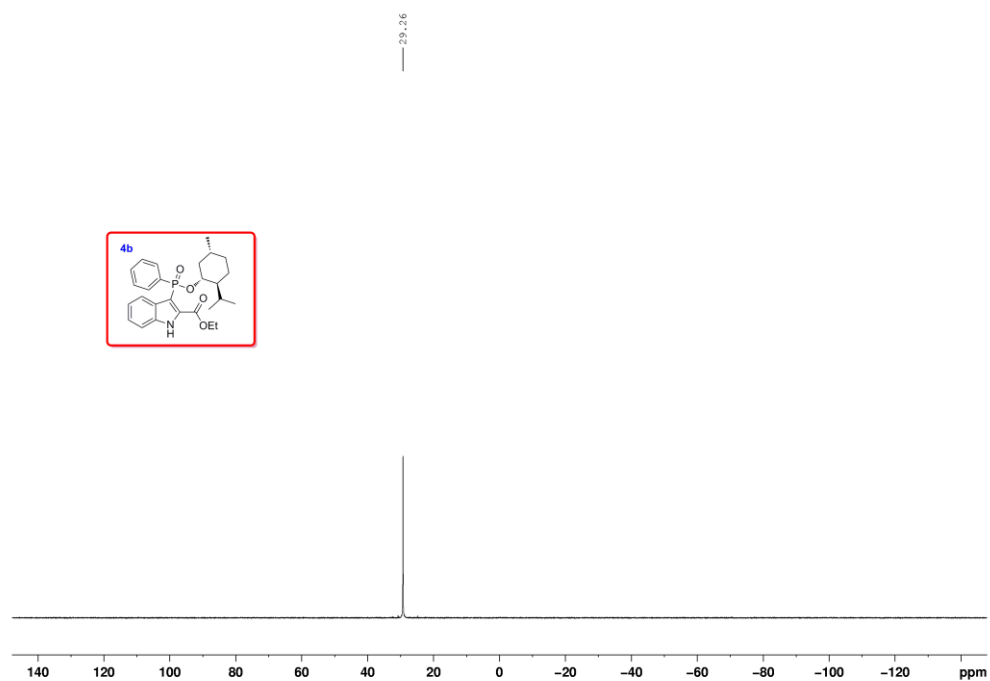



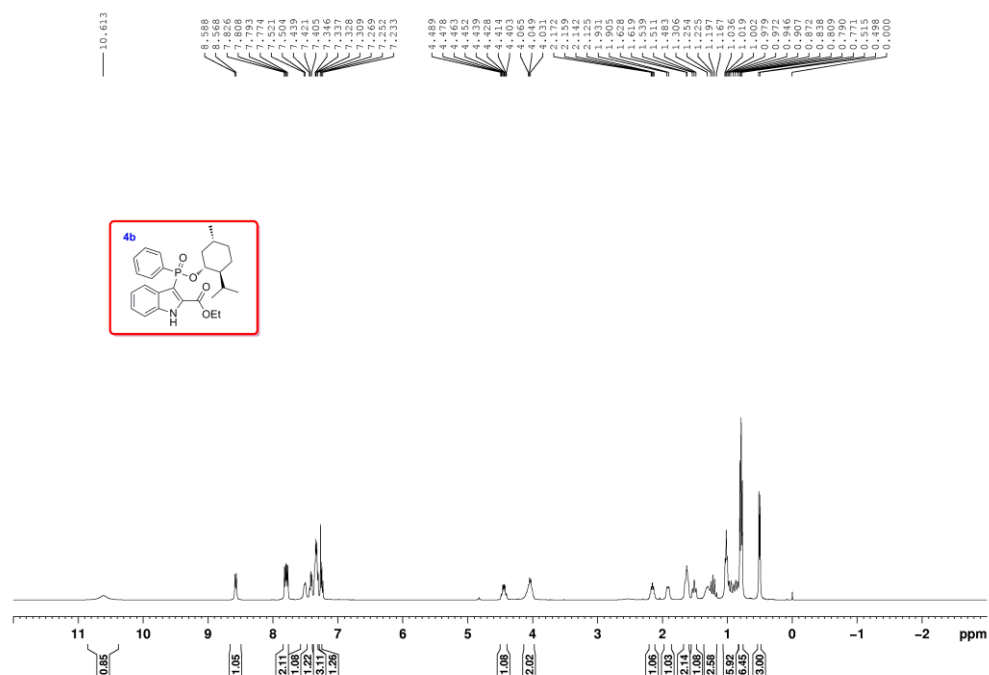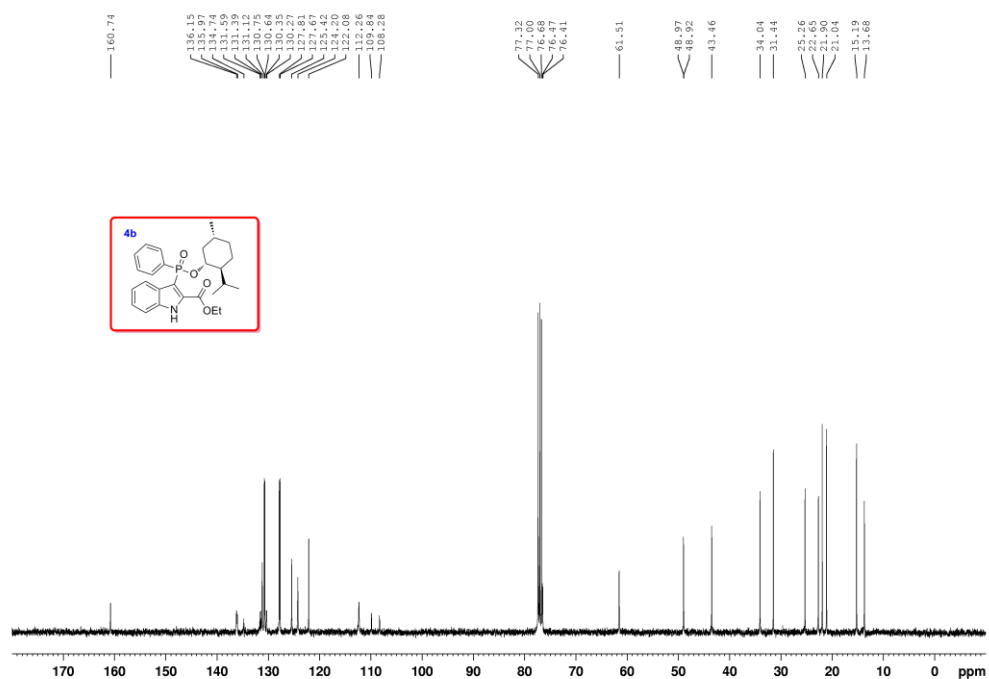

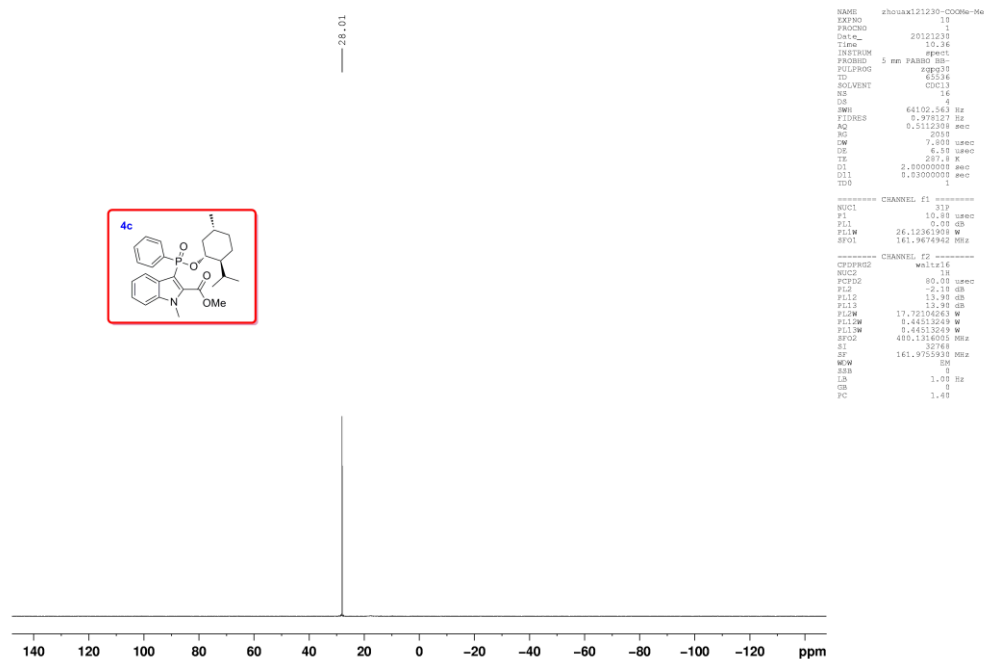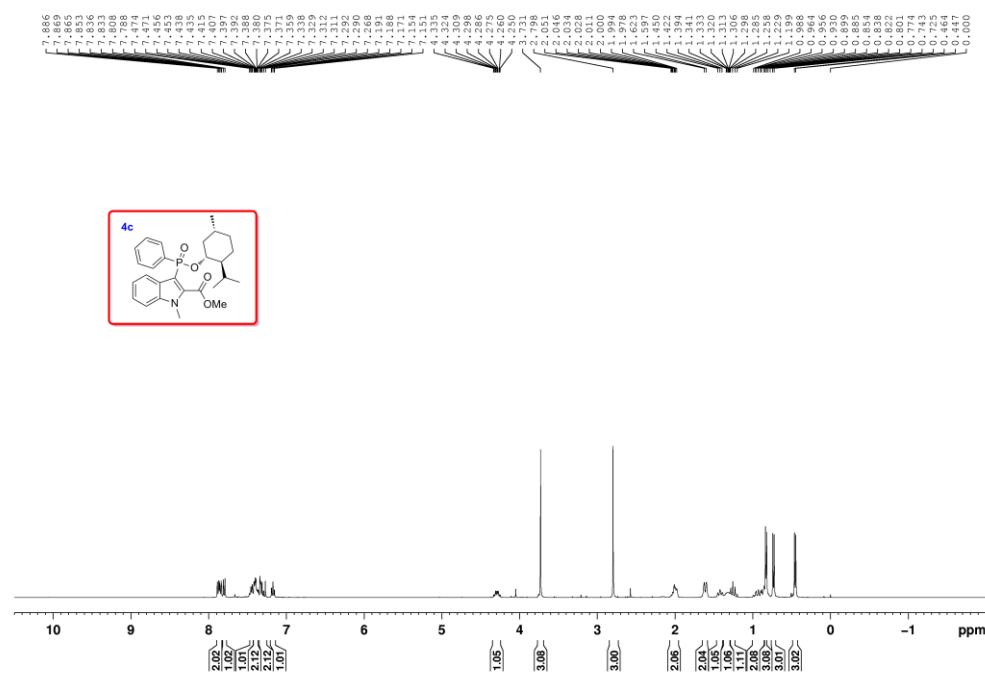

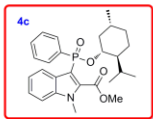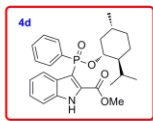

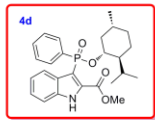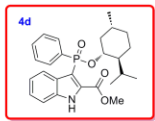

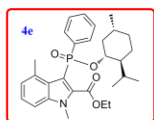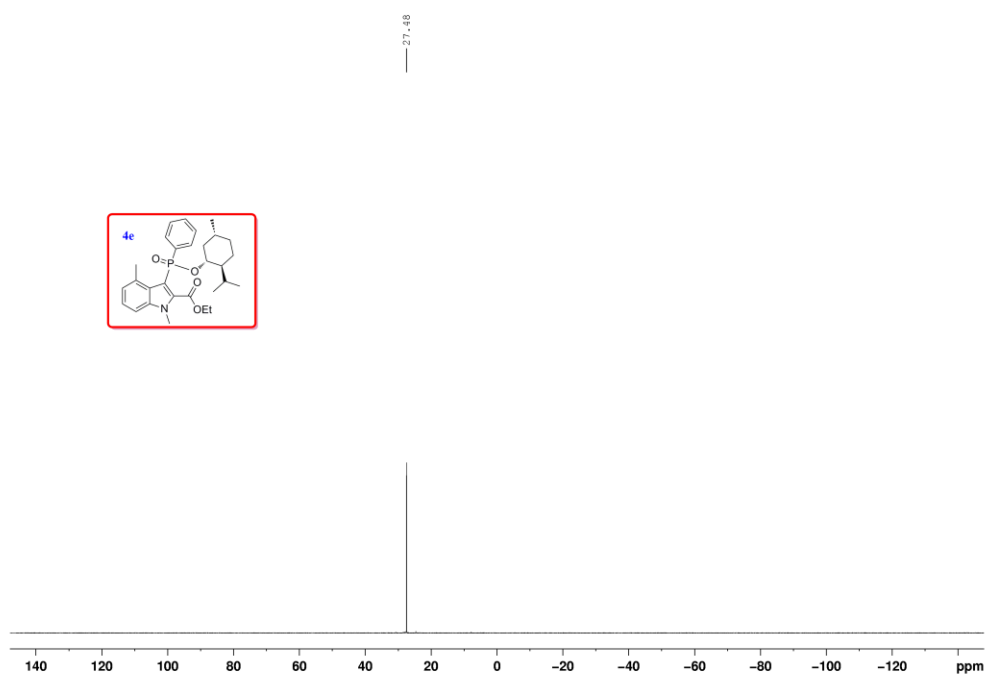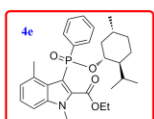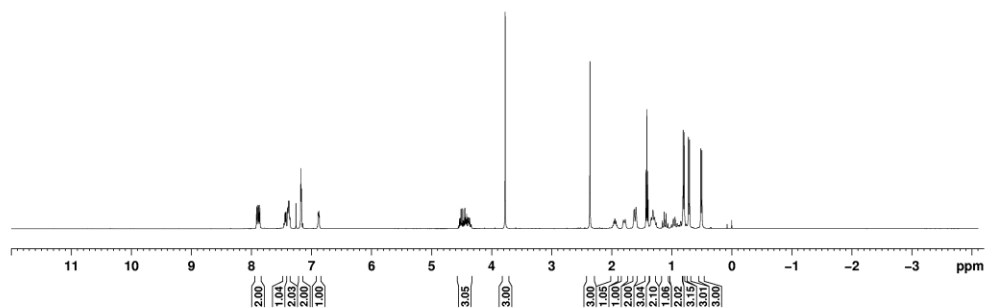

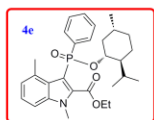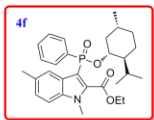

S82



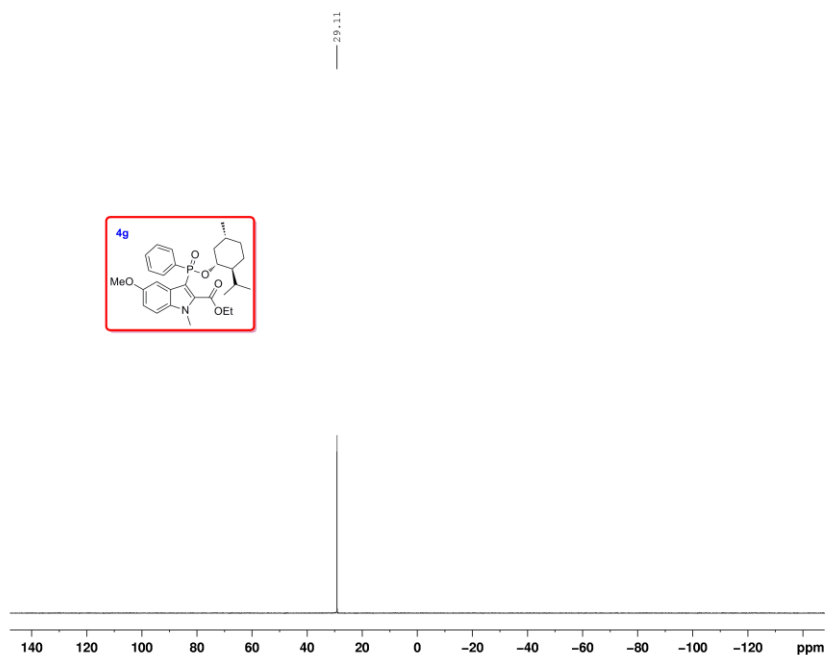

```

NAME      zhouax130104-325
EXPNO     1
PROCNO    1
Date_     20130104
Time      10.18
INSTRUM    spect
PROBHD     5 mm PABBO BB-
PULPROG    zg30
TD         65536
SOLVENT    CDCl3
NS         16
DS         4
SWH         64102.563 Hz
FIDRES     0.978127 Hz
AQ         0.5112308 sec
RG         2050
DW         7.400 usec
DE         6.50 usec
TE         288.0 K
D1         2.00000000 sec
D11        0.03000000 sec
TDO        1

===== CHANNEL f1 =====
NUC1       13C
P1         10.00 usec
PL1        0.00 dB
PL1W       26.12361908 W
SFO1       161.9674942 MHz

===== CHANNEL f2 =====
CPDPRG2    waltz16
NUC2       1H
PCPD2      80.00 usec
PL2        -2.10 dB
PL12       13.90 dB
PL13       13.90 dB
PL1W       17.72104283 W
PL12W      0.44513249 W
PL13W      0.44513249 W
SFO2       400.1360005 MHz
SI         32768
SF         161.9755930 MHz
WDW         EM
SSB         0
LB         1.00 Hz
GB         0
PC         1.40

```

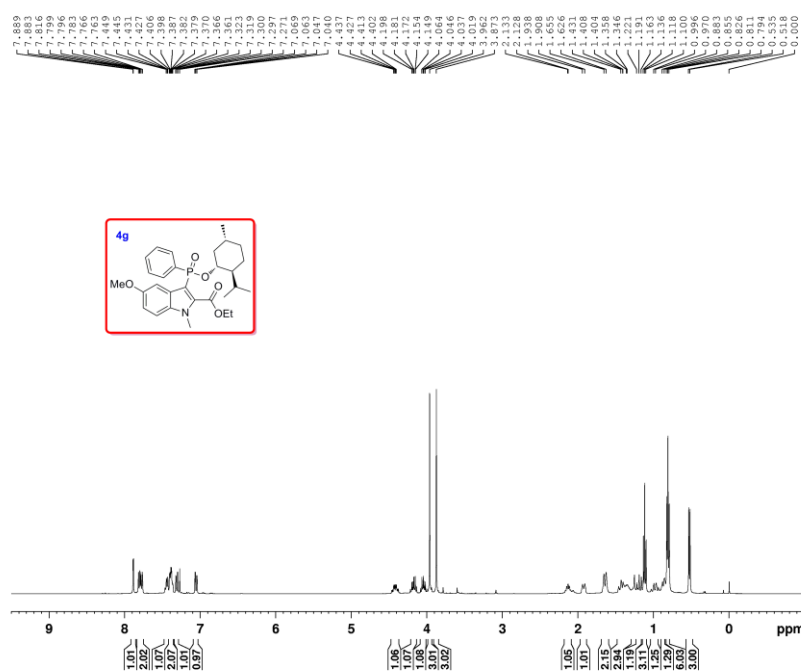

```

NAME      zhouax130104-325
EXPNO     10
PROCNO    1
Date_     20130104
Time      10.16
INSTRUM    spect
PROBHD     5 mm PABBO BB-
PULPROG    zg30
TD         65536
SOLVENT    CDCl3
NS         8
DS         2
JWH        8223.685 Hz
FIDRES     0.125483 Hz
AQ         3.9846387 sec
RG         64
DW         60.800 usec
DE         6.50 usec
TE         287.3 K
D1         1.00000000 sec
TDO        1

===== CHANNEL f1 =====
NUC1       1H
P1         14.70 usec
PL1        -1.00 dB
PL1W       13.75590801 W
SFO1       400.1324710 MHz
SI         32768
SF         400.1300006 MHz
WDW         EM
SSB         0
LB         0.30 Hz
GB         0
PC         1.00

```



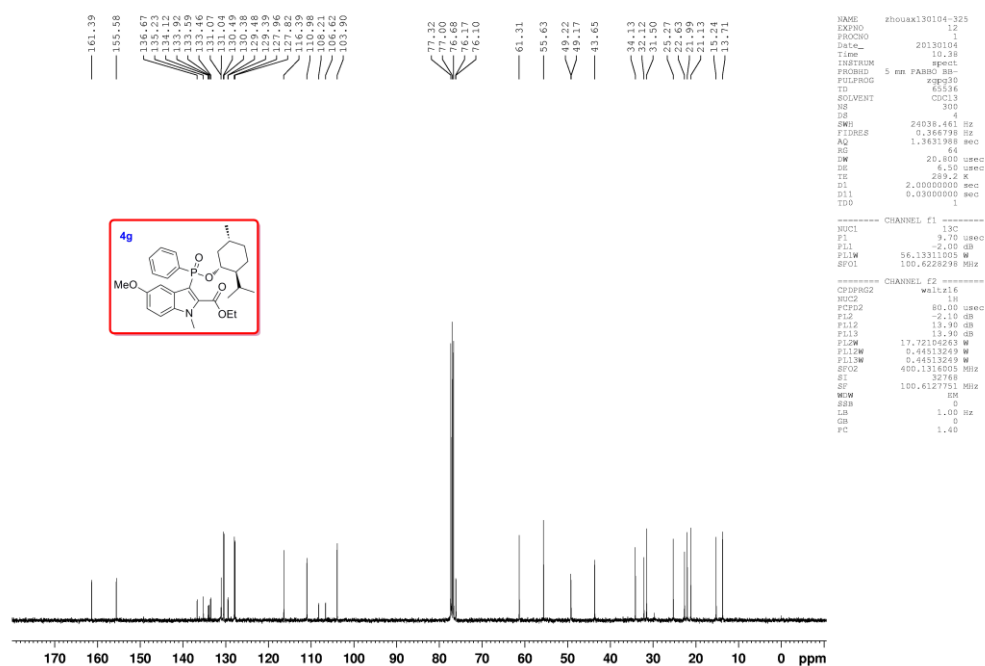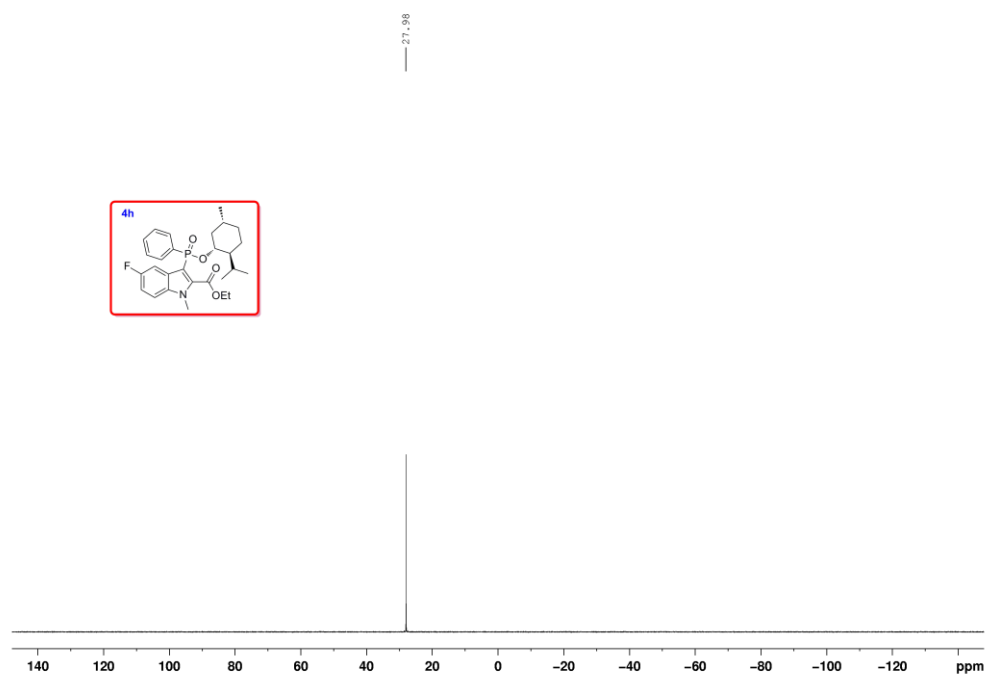

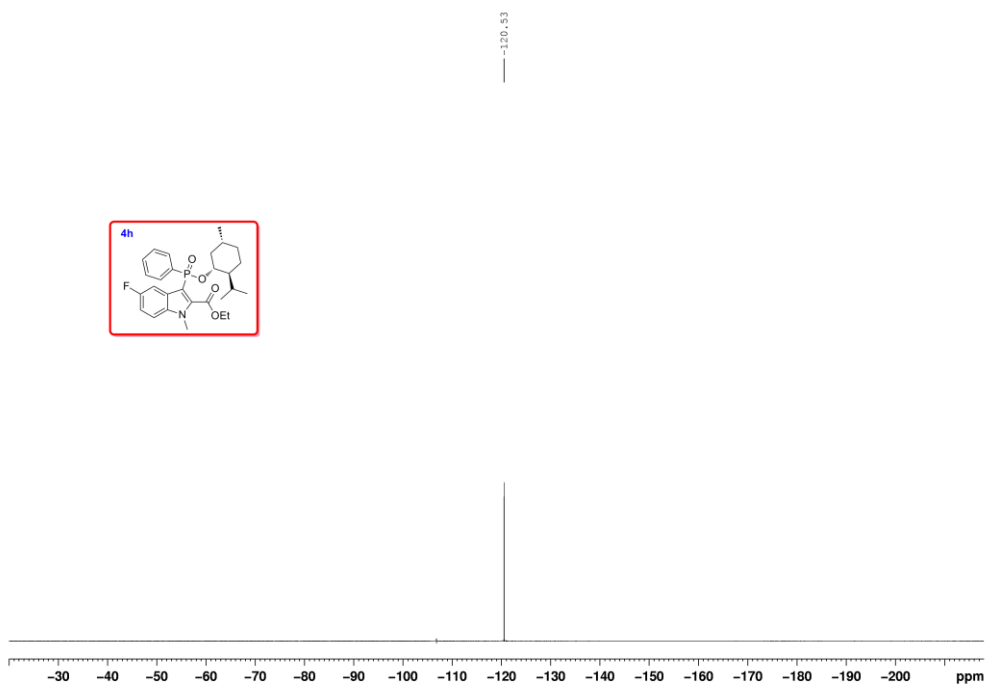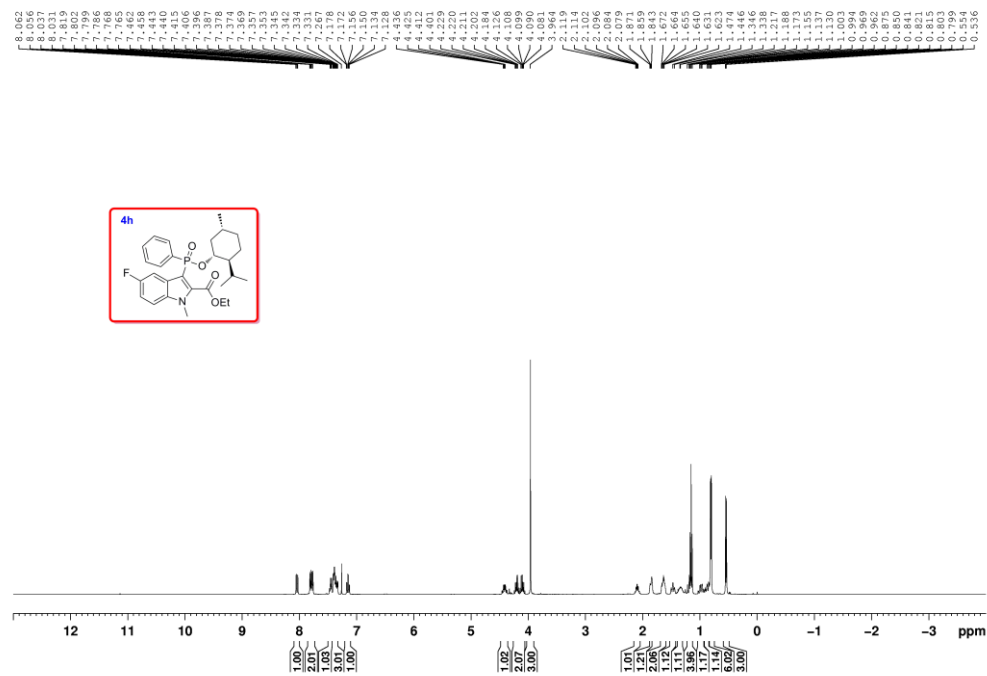

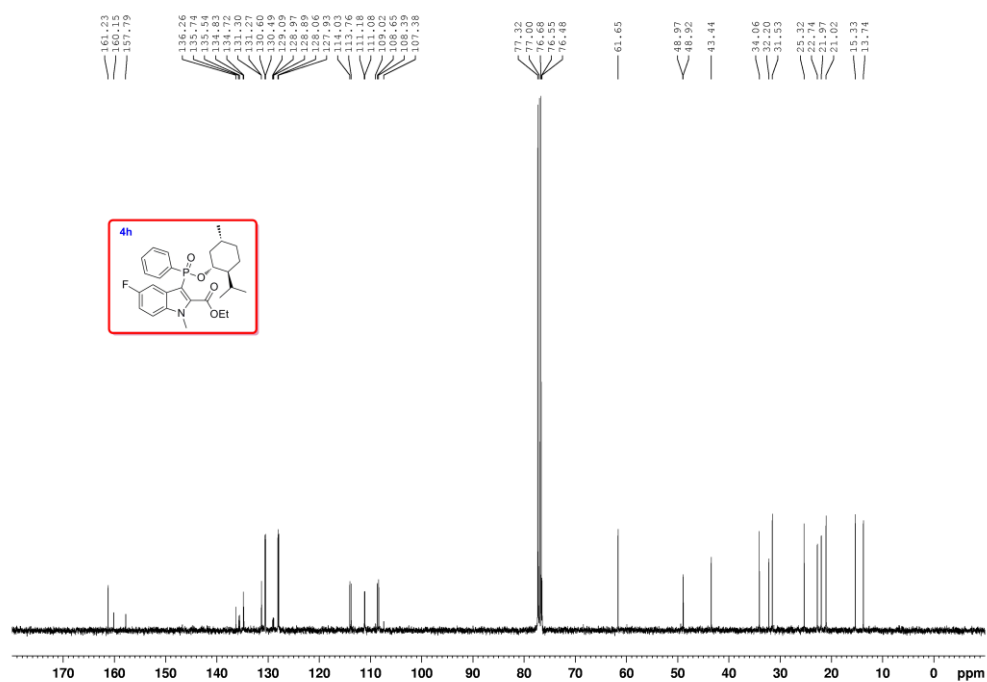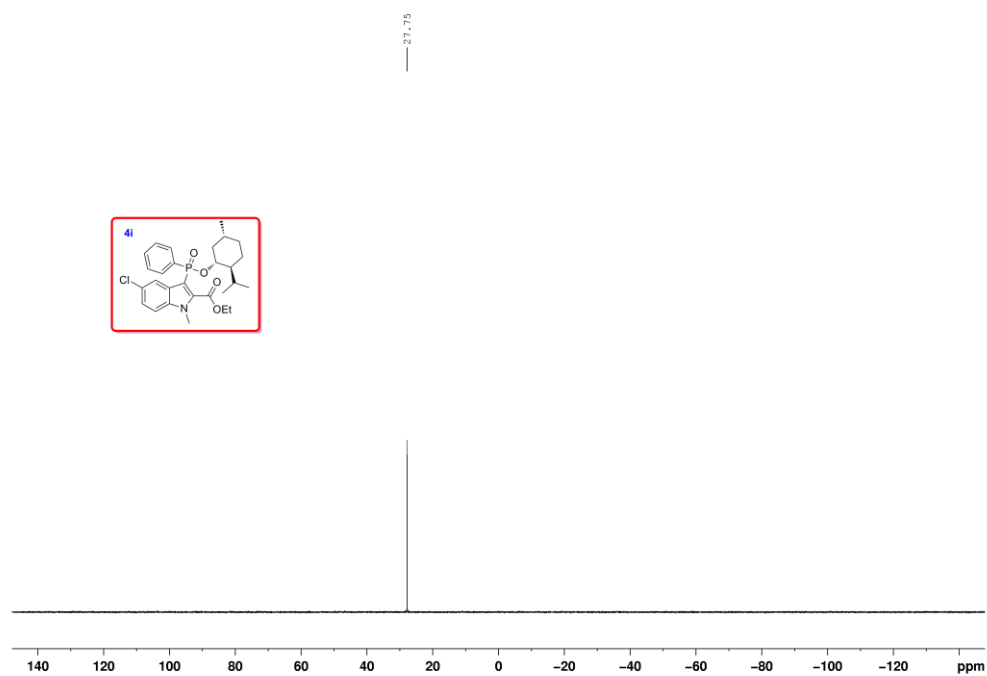

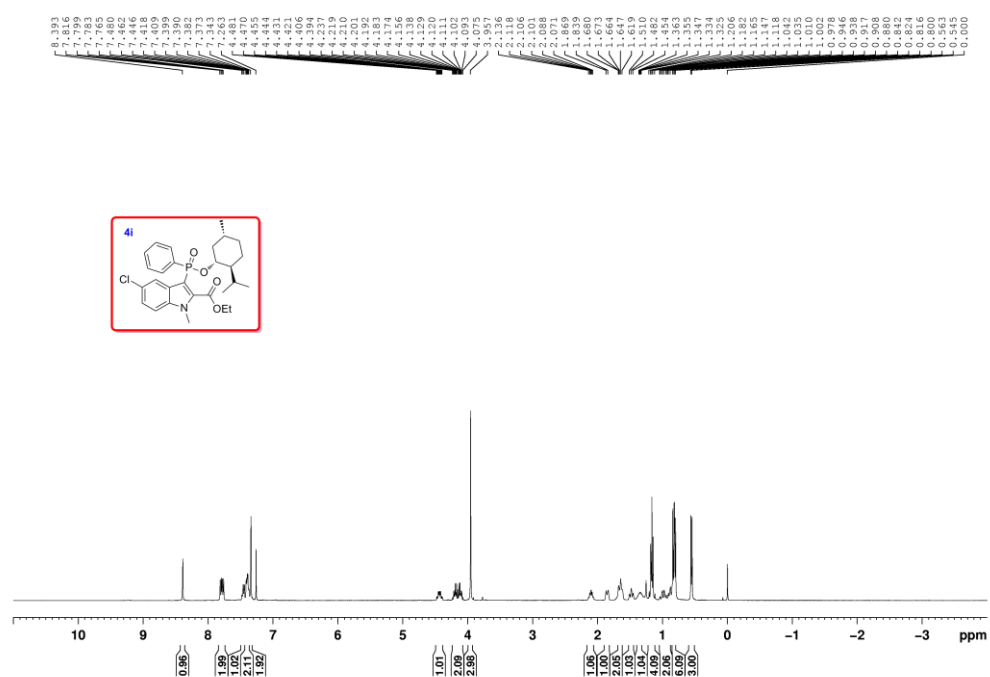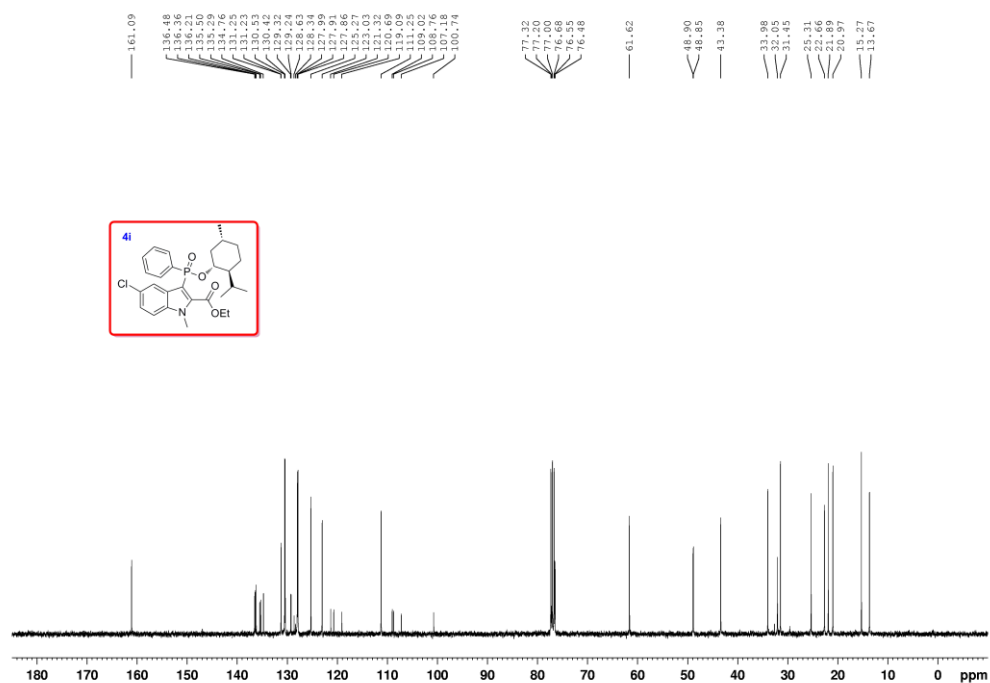

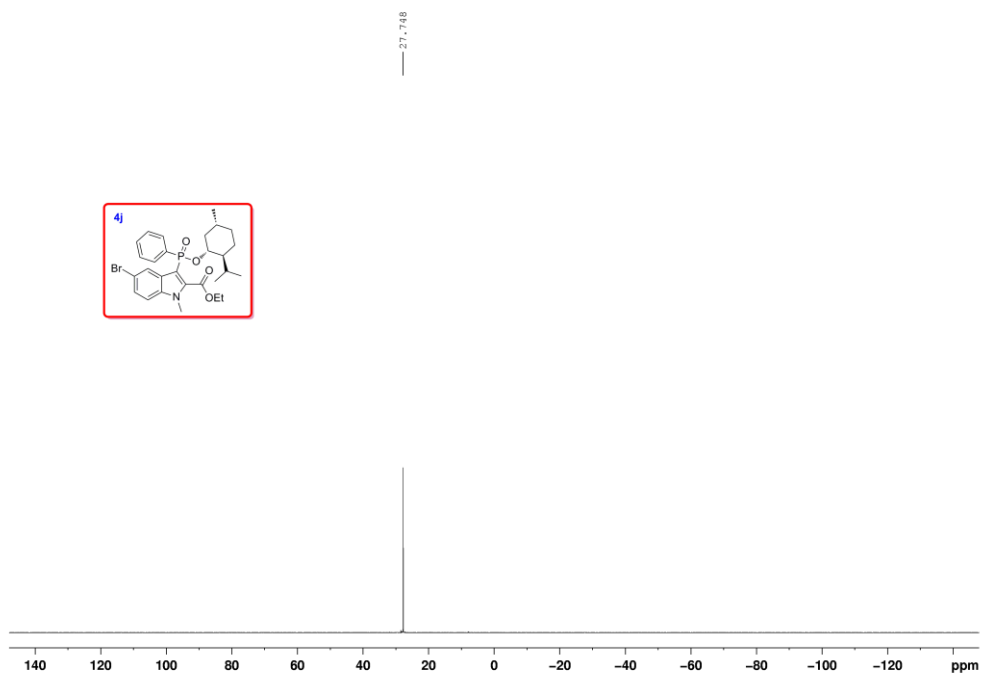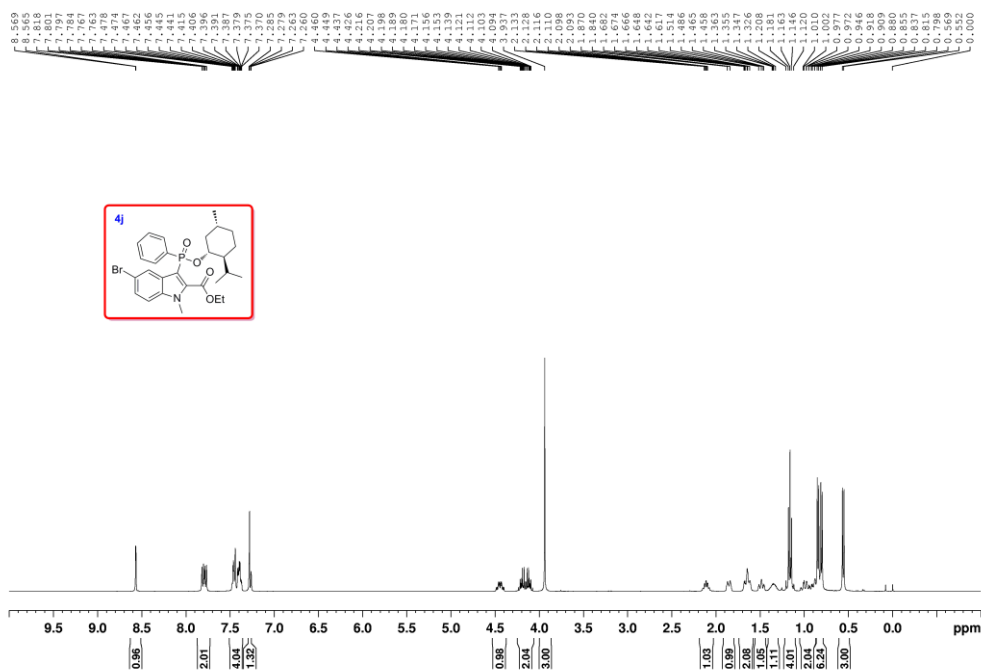

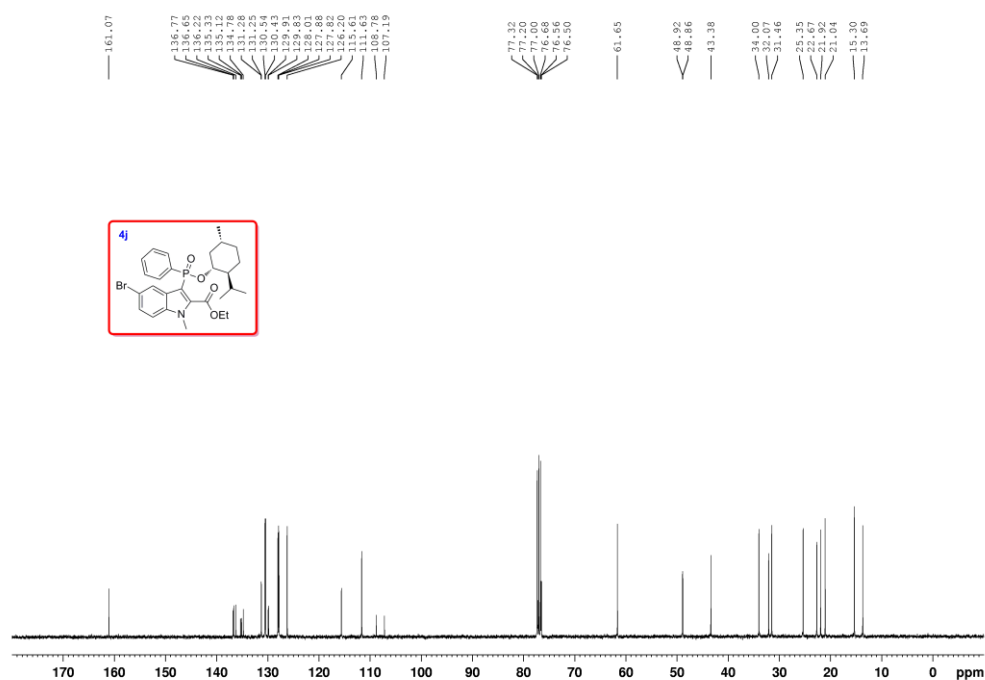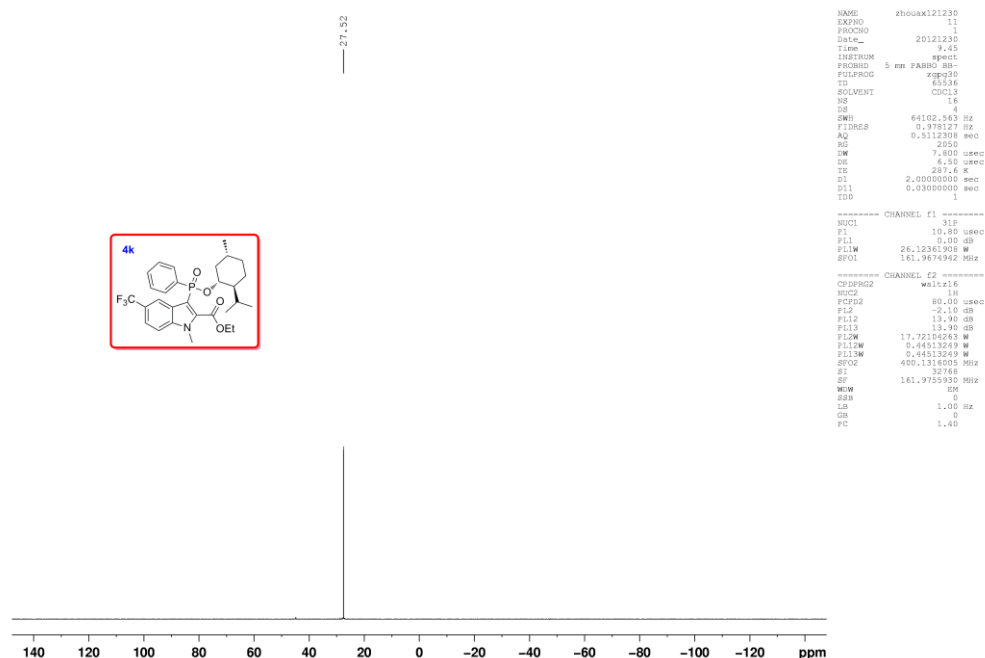

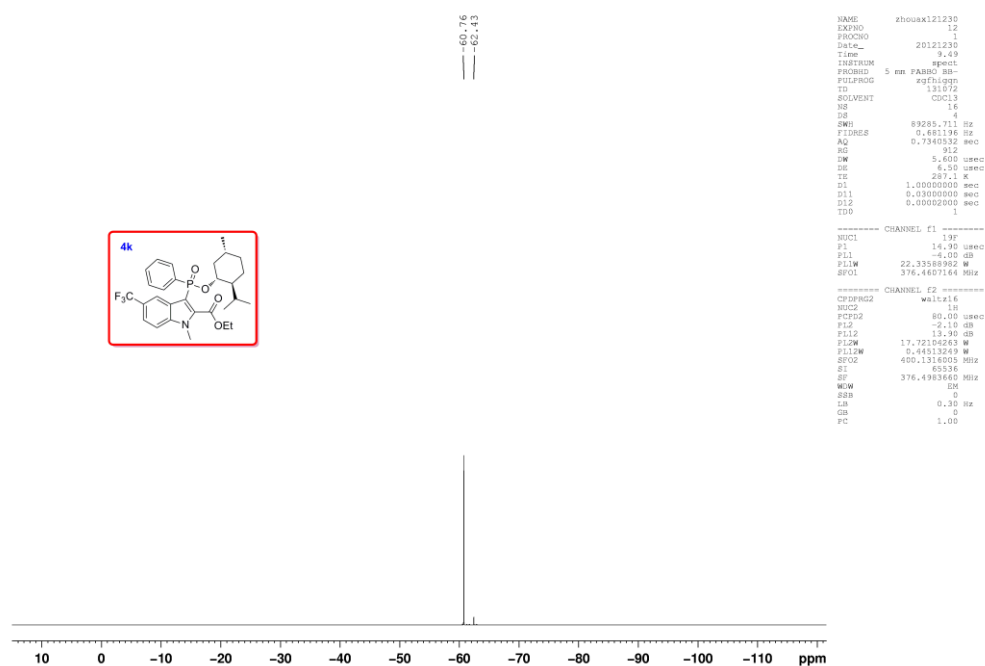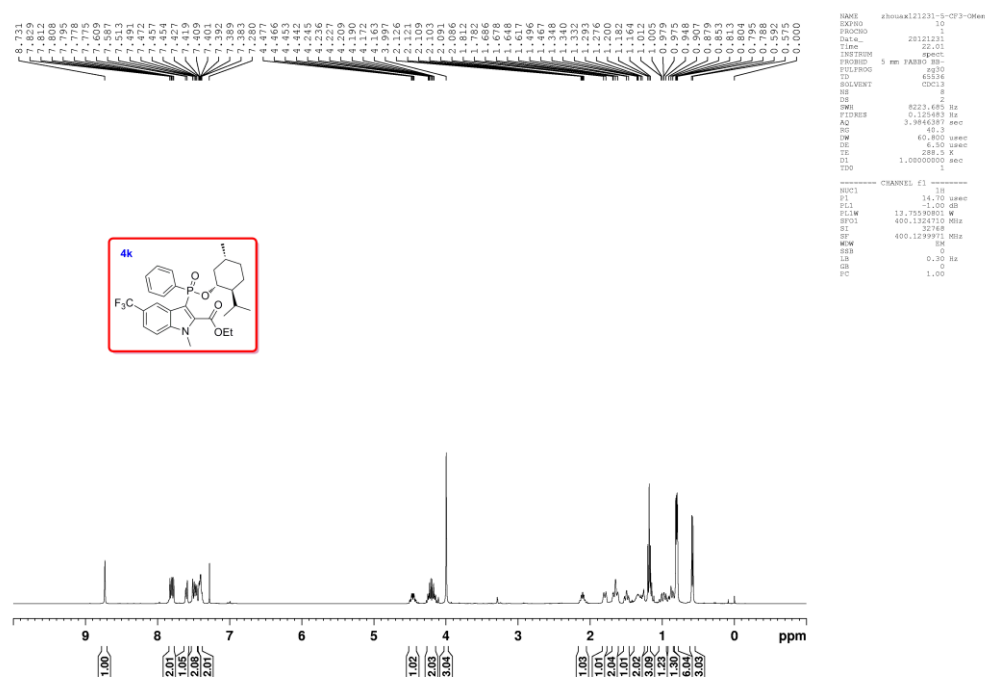

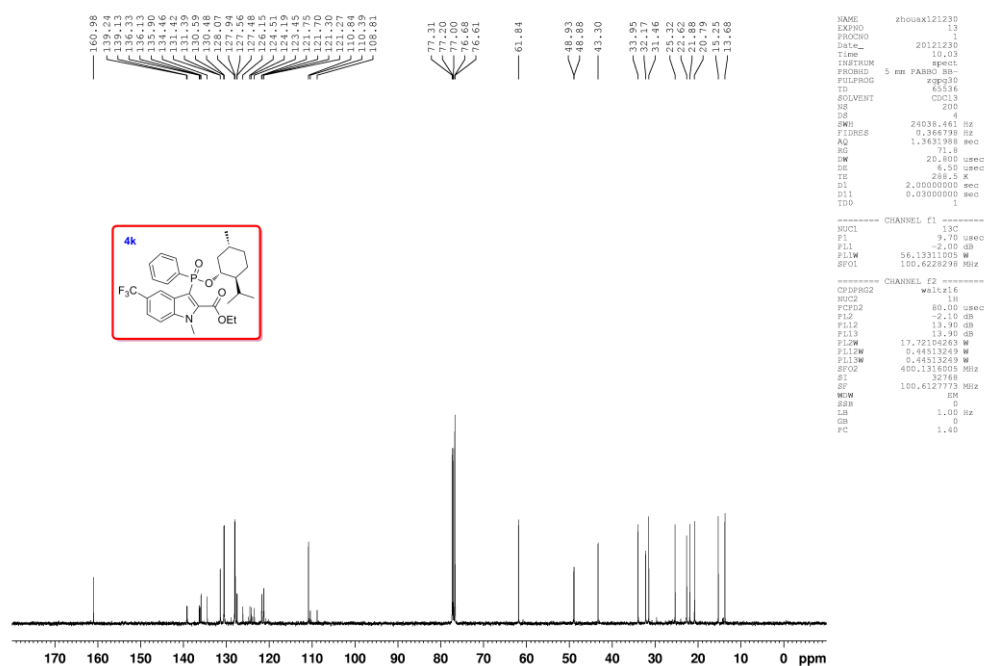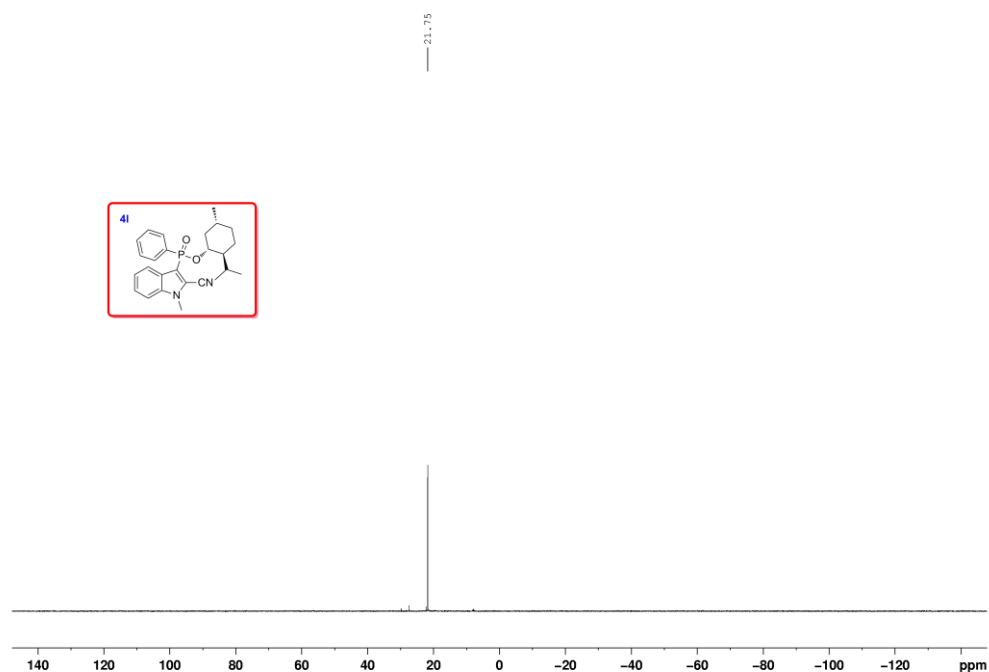



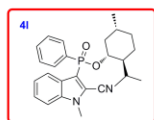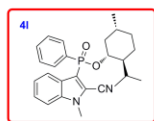

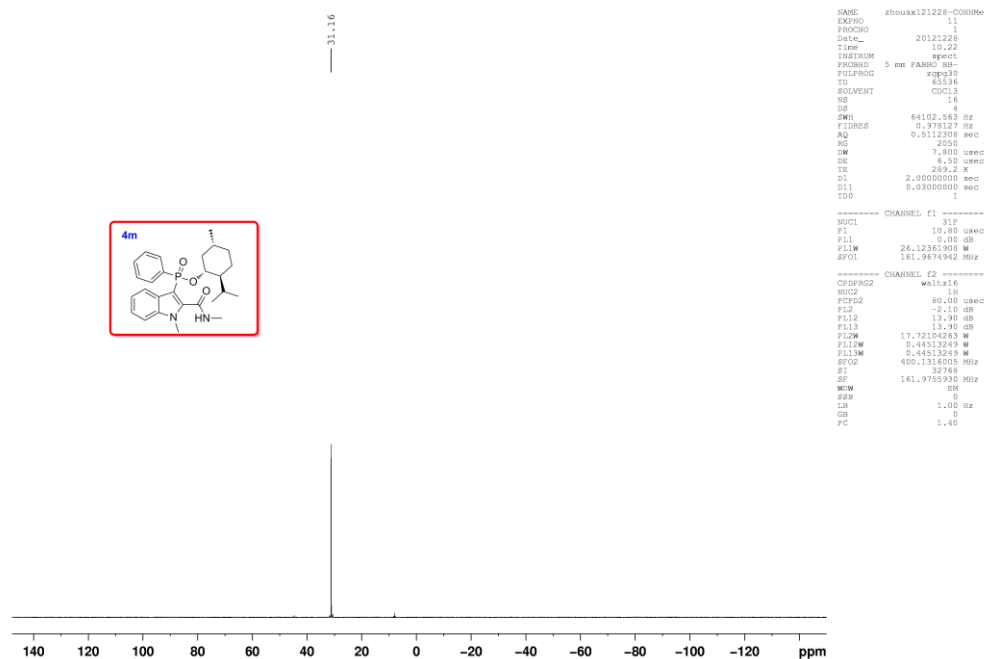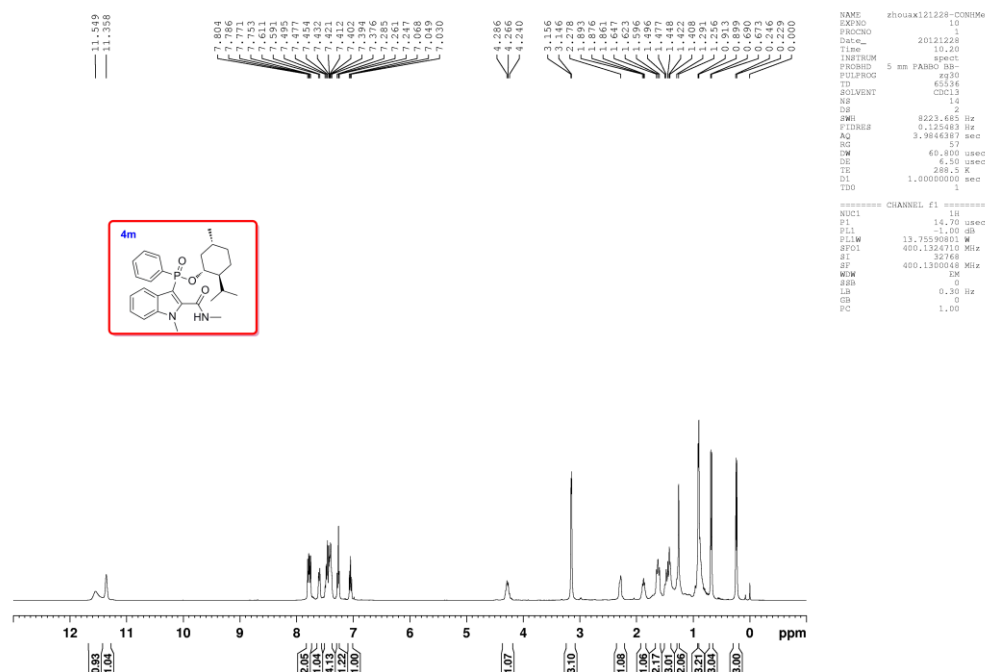



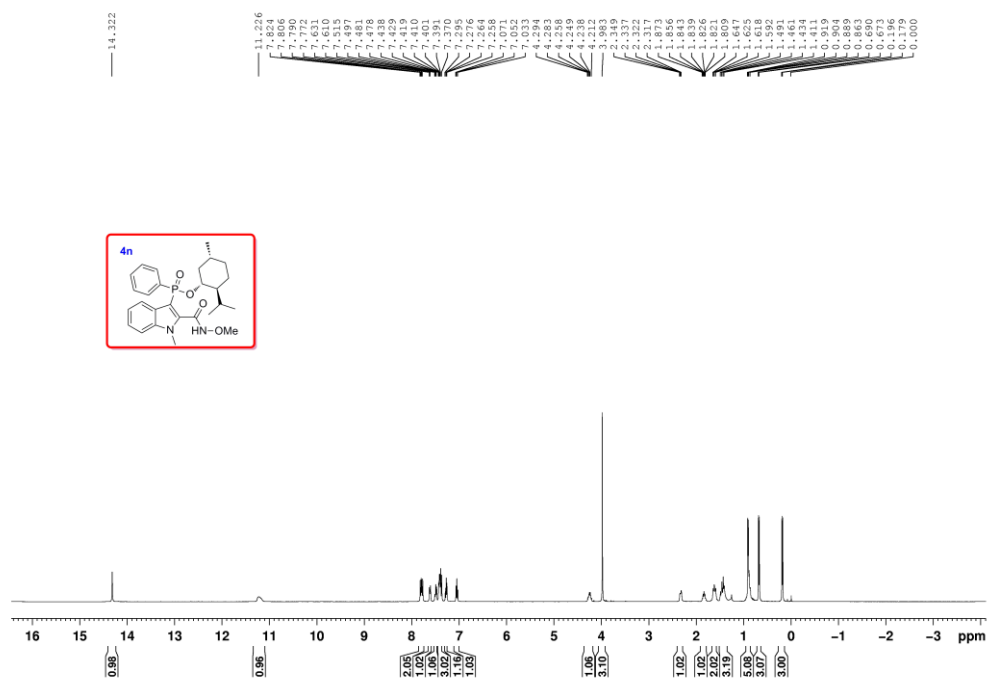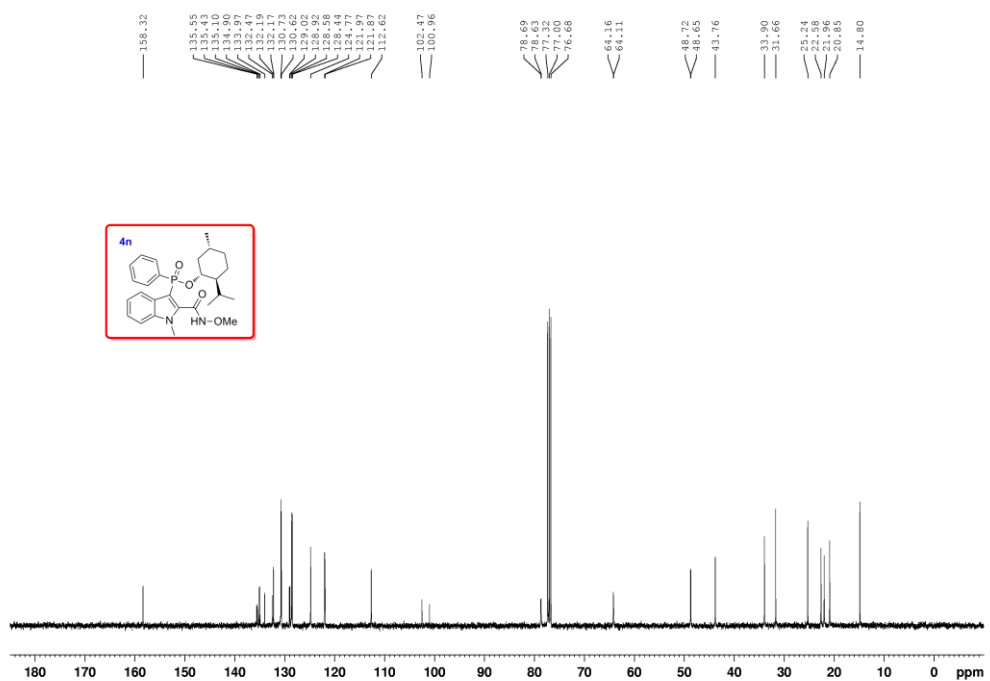

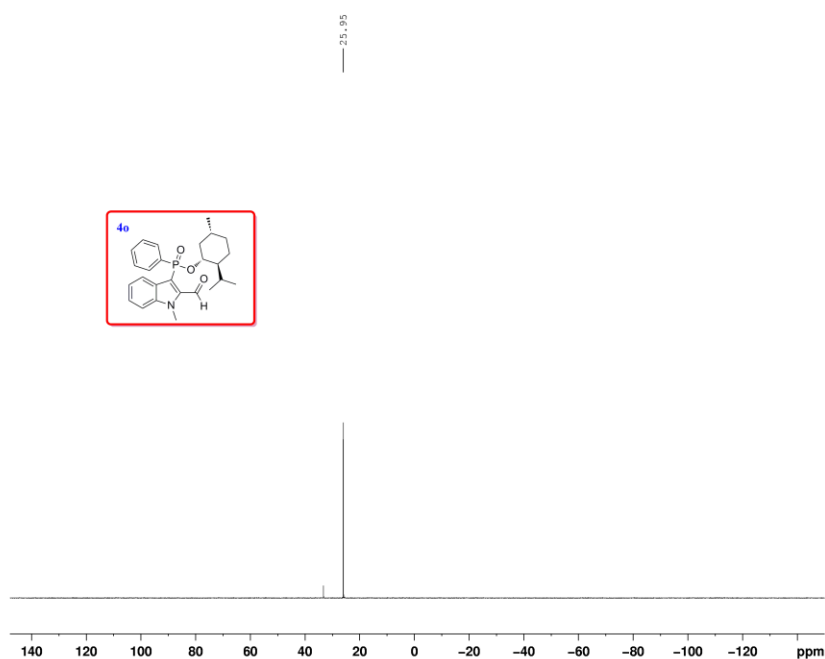

NAME zhouax121227-289  
EXPNO 1  
PROCNO 1  
Date\_ 20121228  
Time 10.15  
INSTRUM spect  
PROBHD 5 mm FASBO 80  
PULPROG zgpg30  
TD 65536  
SOLVENT CDCl3  
NS 16  
DS 4  
SWH 64102.563 Hz  
FIDRES 0.178127 Hz  
AQ 0.5112308 sec  
RG 2550  
DW 7.800 usec  
DE 4.50 usec  
TE 288.9 K  
DT 2.00000000 sec  
D11 0.03000000 sec  
TDO 1

===== CHANNEL f1 =====  
NUC1 13C  
P1 10.00 usec  
PL1 0.00 dB  
PL1W 26.12361908 W  
SFO1 161.9674942 MHz

===== CHANNEL f2 =====  
CPDPRG2 waltz16  
NUC2 1H  
PCPD2 80.00 usec  
PL2 -2.10 dB  
PL12 13.90 dB  
PL13 13.90 dB  
PL1W 17.92104263 W  
PL12W 0.44513249 W  
PL13W 0.44513249 W  
SFO2 400.1316005 MHz  
ST 32768  
SF 161.9755930 MHz  
WUW EM  
SFB 0  
LB 1.00 Hz  
GB 0  
PC 1.40

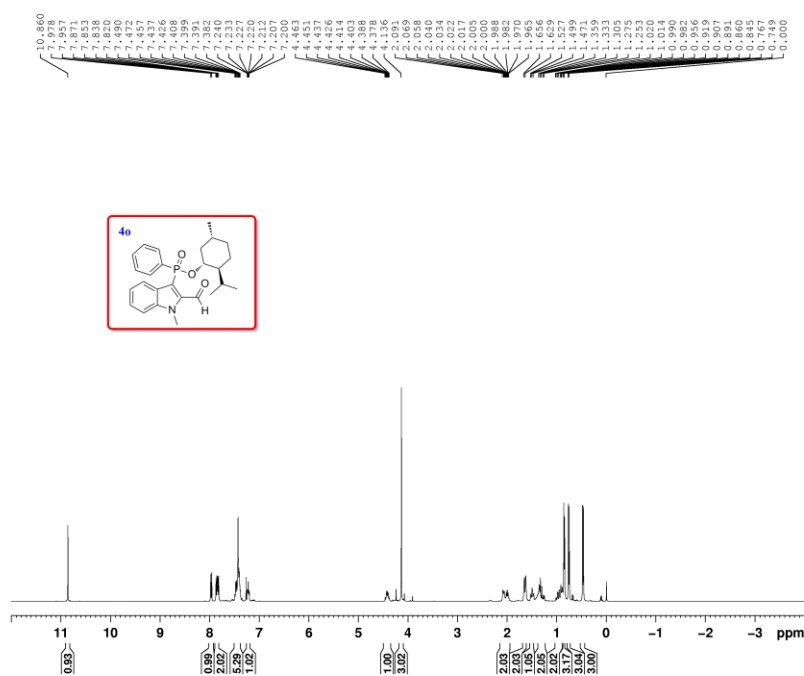

NAME zhouax121227-289  
EXPNO 20  
PROCNO 1  
Date\_ 20121228  
Time 18.51  
INSTRUM spect  
PROBHD 5 mm FASBO 80  
PULPROG zg30  
TD 65536  
SOLVENT CDCl3  
NS 16  
DS 4  
SWH 8223.485 Hz  
FIDRES 0.125883 Hz  
AQ 3.9846387 sec  
RG 80.5  
DW 65.800 usec  
DE 6.50 usec  
TE 288.6 K  
DT 1.00000000 sec  
TDO 1

===== CHANNEL f1 =====  
NUC1 1H  
P1 12.00 usec  
PL1 -3.00 dB  
PL1W 22.90425882 W  
SFO1 400.1324710 MHz  
ST 32768  
SF 400.1300033 MHz  
WUW EM  
SFB 0  
LB 0.30 Hz  
GB 0  
PC 1.00

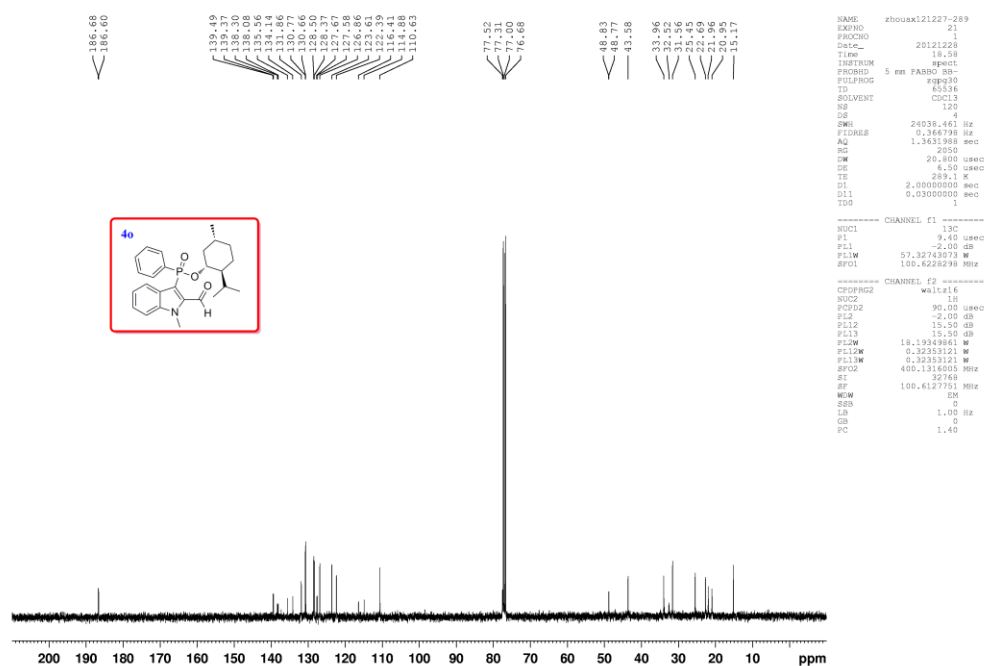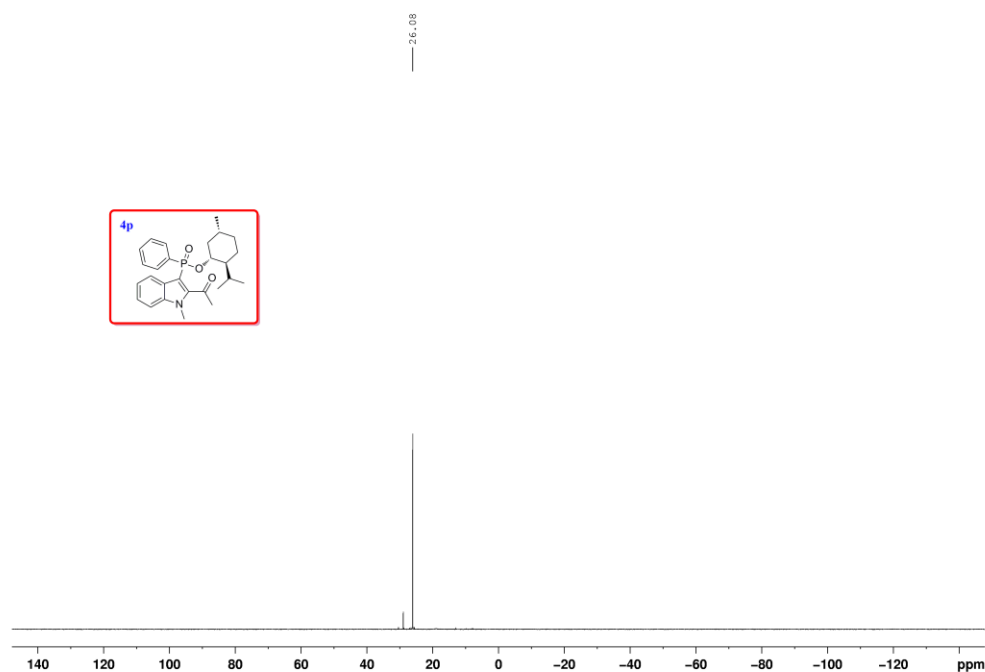

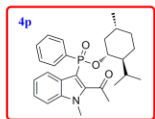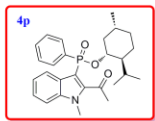

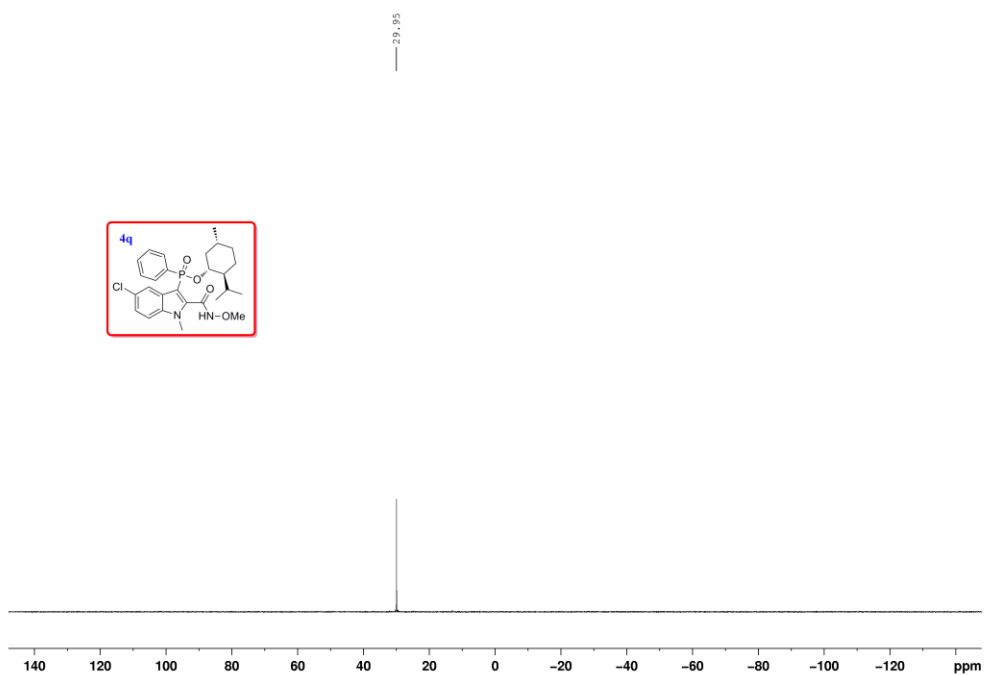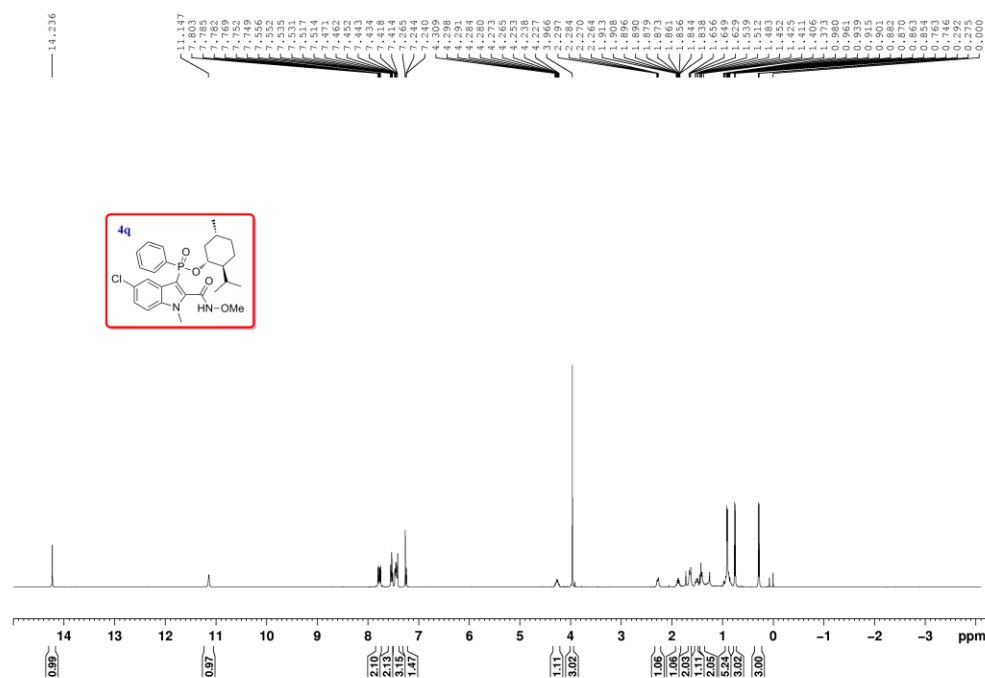



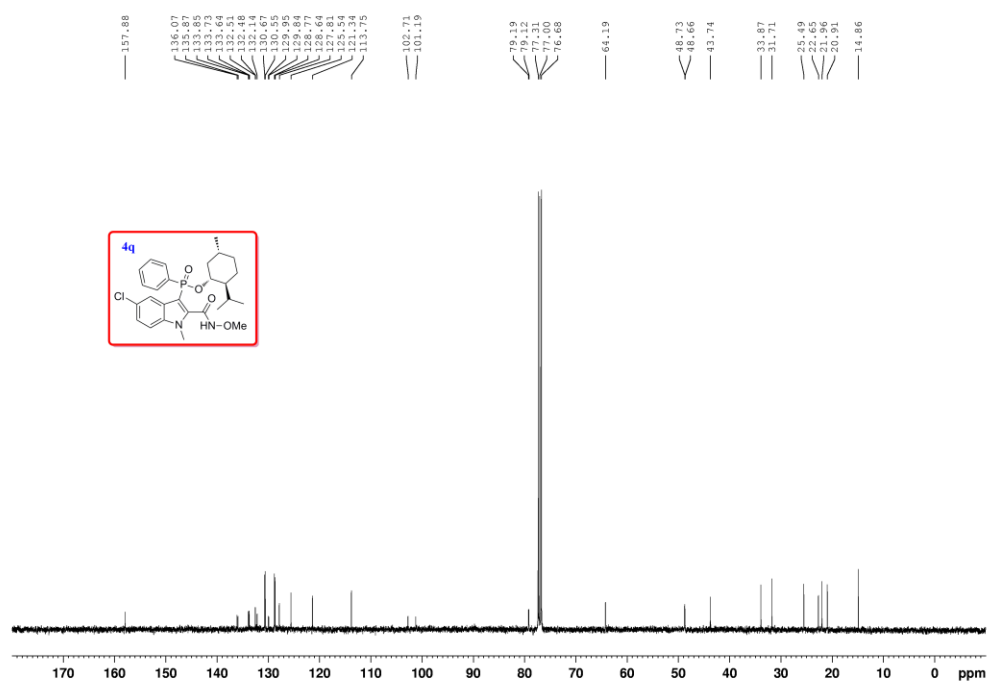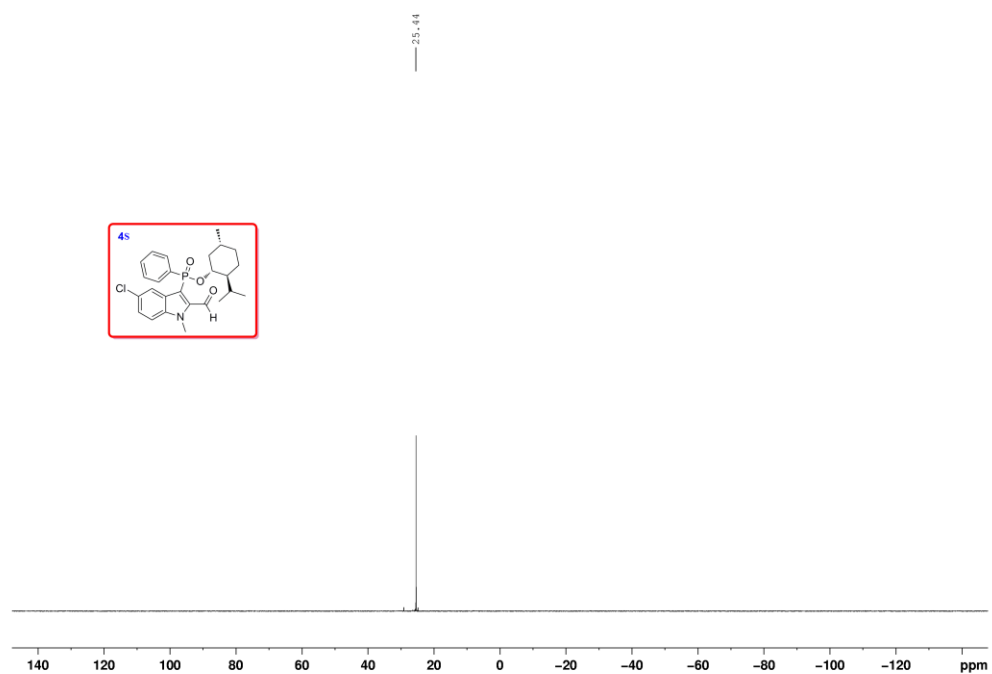

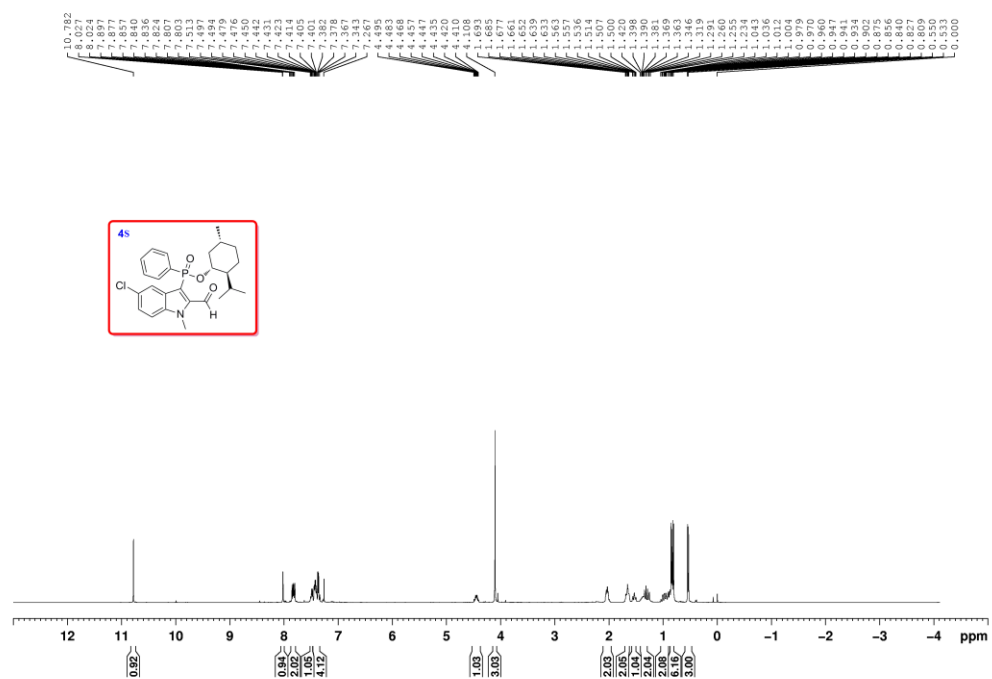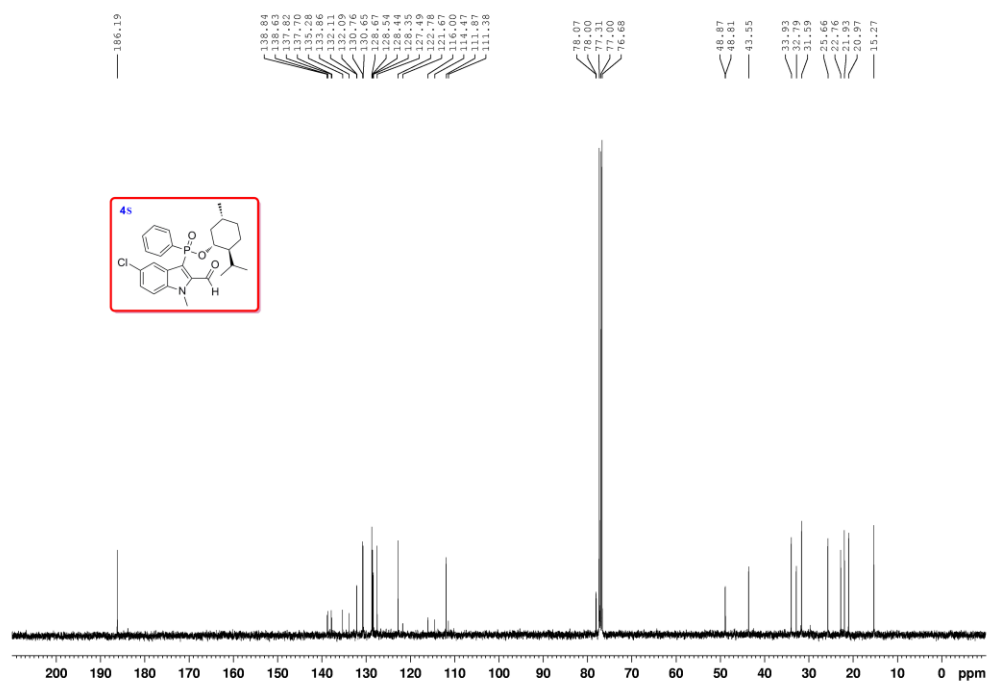

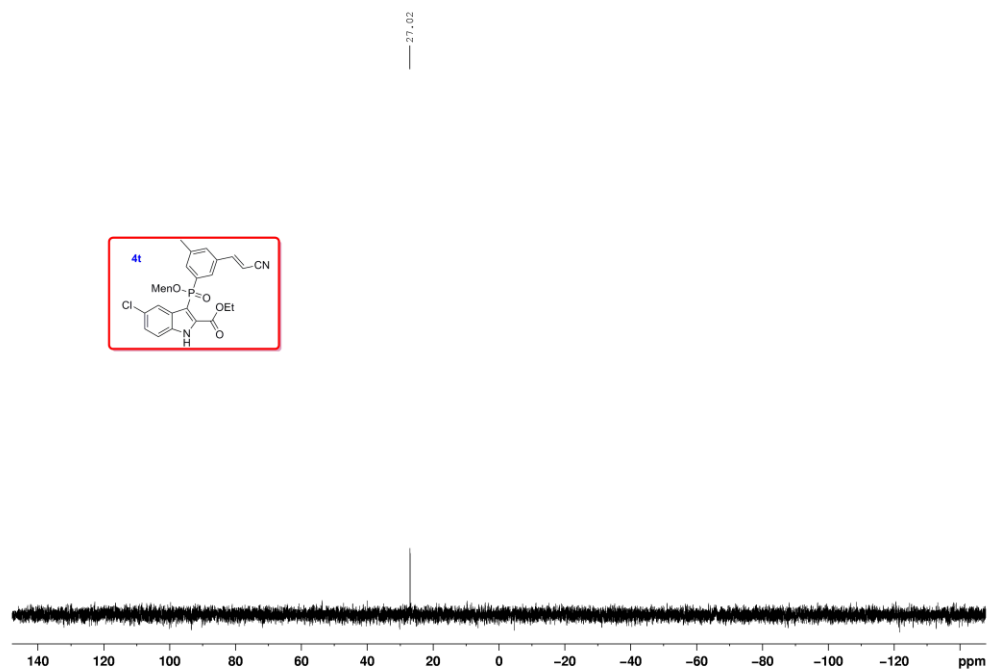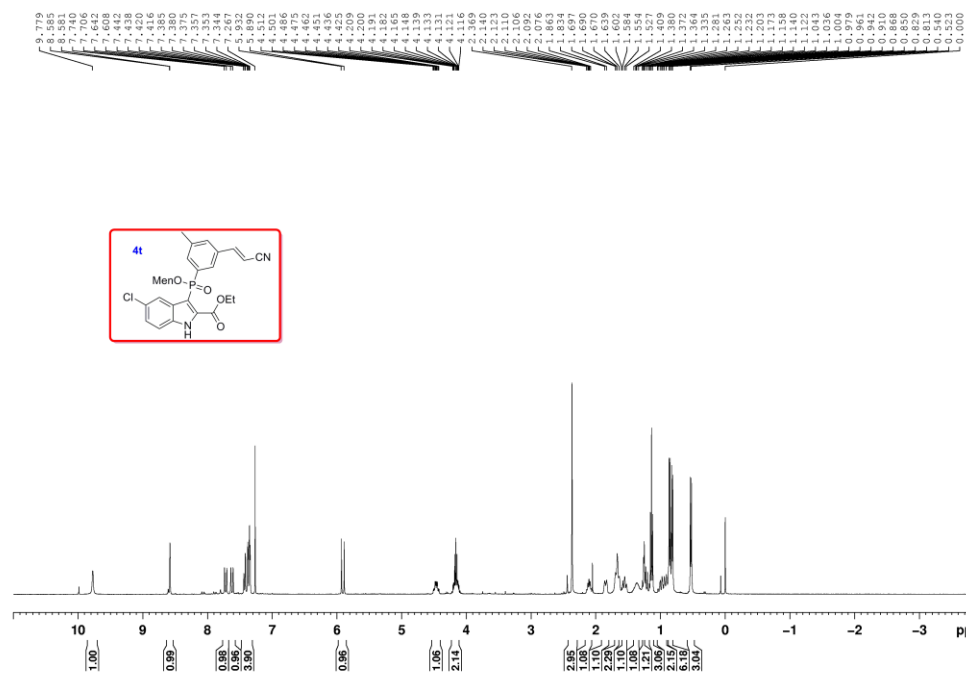

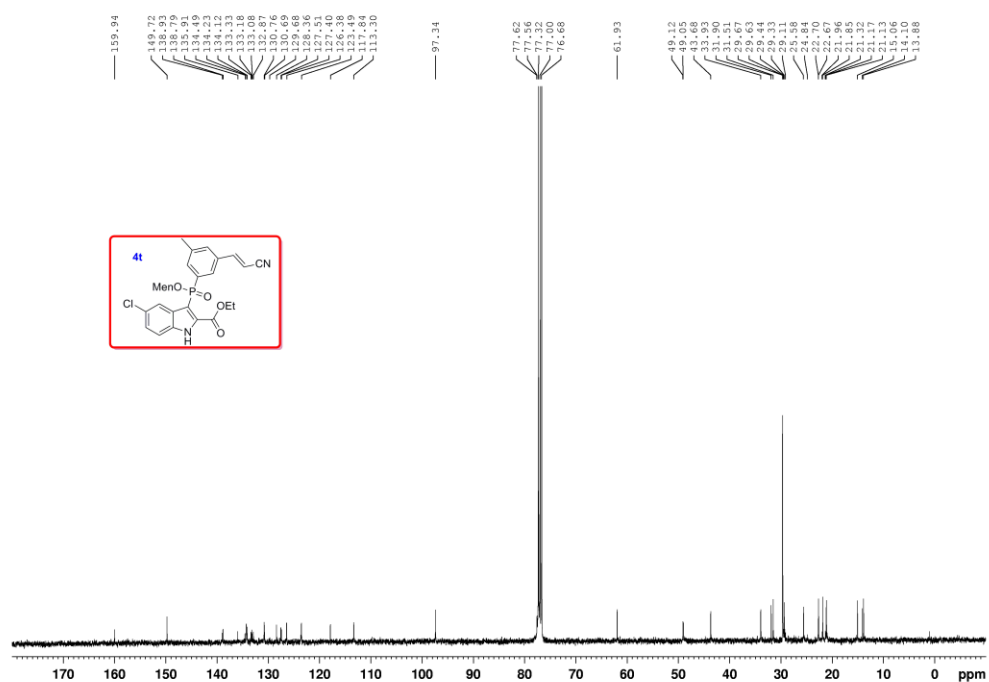

Supplement: c4cc01815j1.pdf [file c4cc01815j1.pdf]
